# Supplementary material
Source: PubMed Central journal article supplement (PMC6289179)

## Supporting Information

### Catalyst-Controlled and Tunable, Chemoselective Silver-Catalyzed Intermolecular Nitrene Transfer: Experimental and Computational Studies

Nicholas S. Dolan,<sup>†</sup> Ryan J. Scamp,<sup>†</sup> Tzuhsiung Yang,<sup>†</sup> John F. Berry\* and Jennifer M. Schomaker\*

*Department of Chemistry, University of Wisconsin-Madison, 1101 University Avenue  
Madison, Wisconsin, 53706-1396*

|                                |      |
|--------------------------------|------|
| <b>Table of Contents</b> ..... | S2-1 |
| <b>I. NMR spectra</b> .....    | S2-2 |

**Compound 3a.**

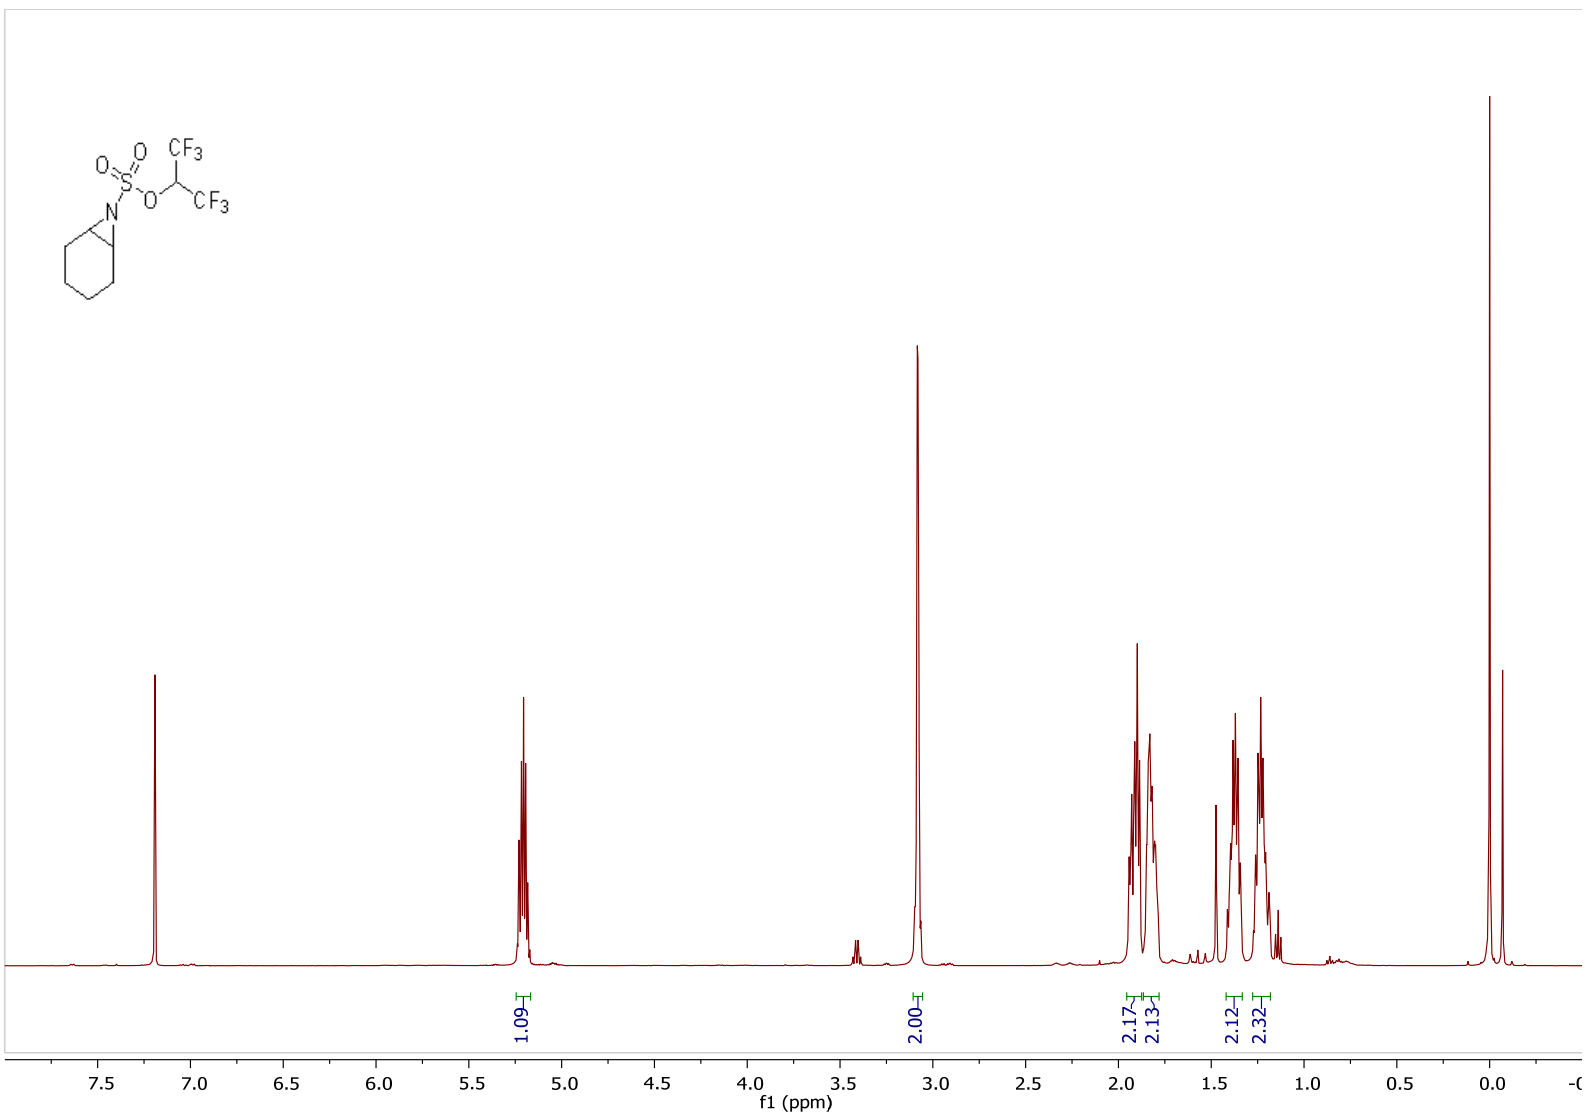

**Compound 3a.**

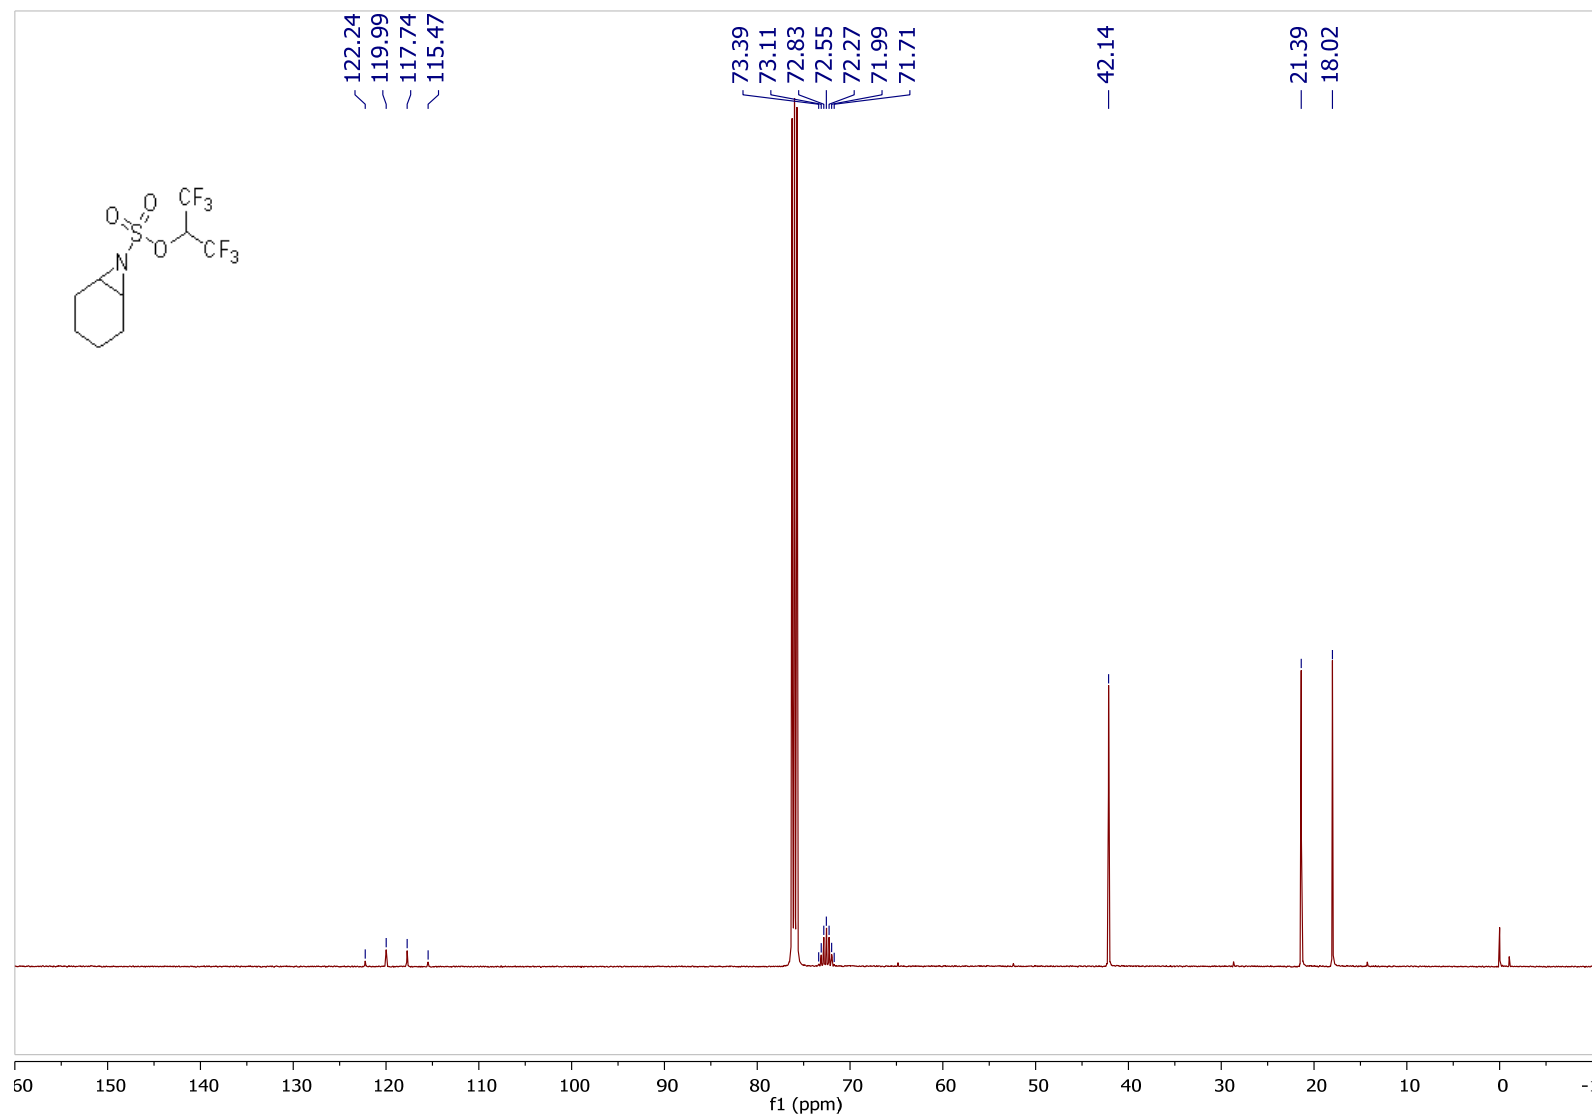

**Compound 3b.**

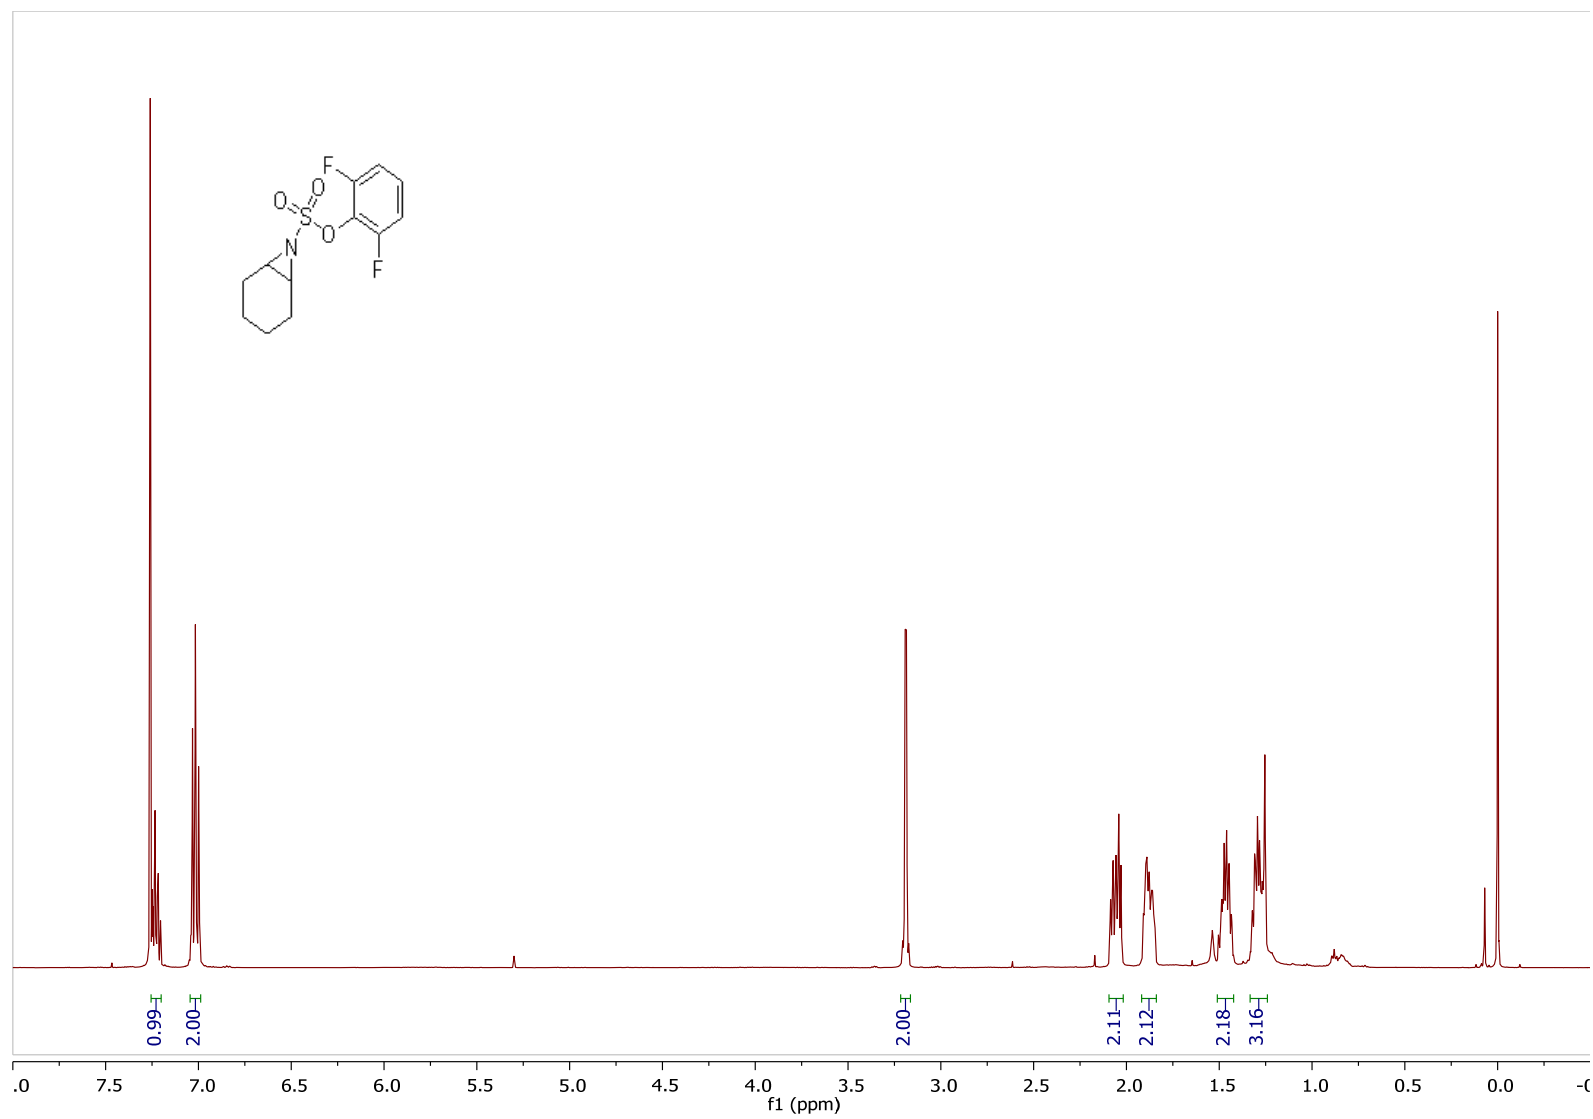

**Compound 3b.**

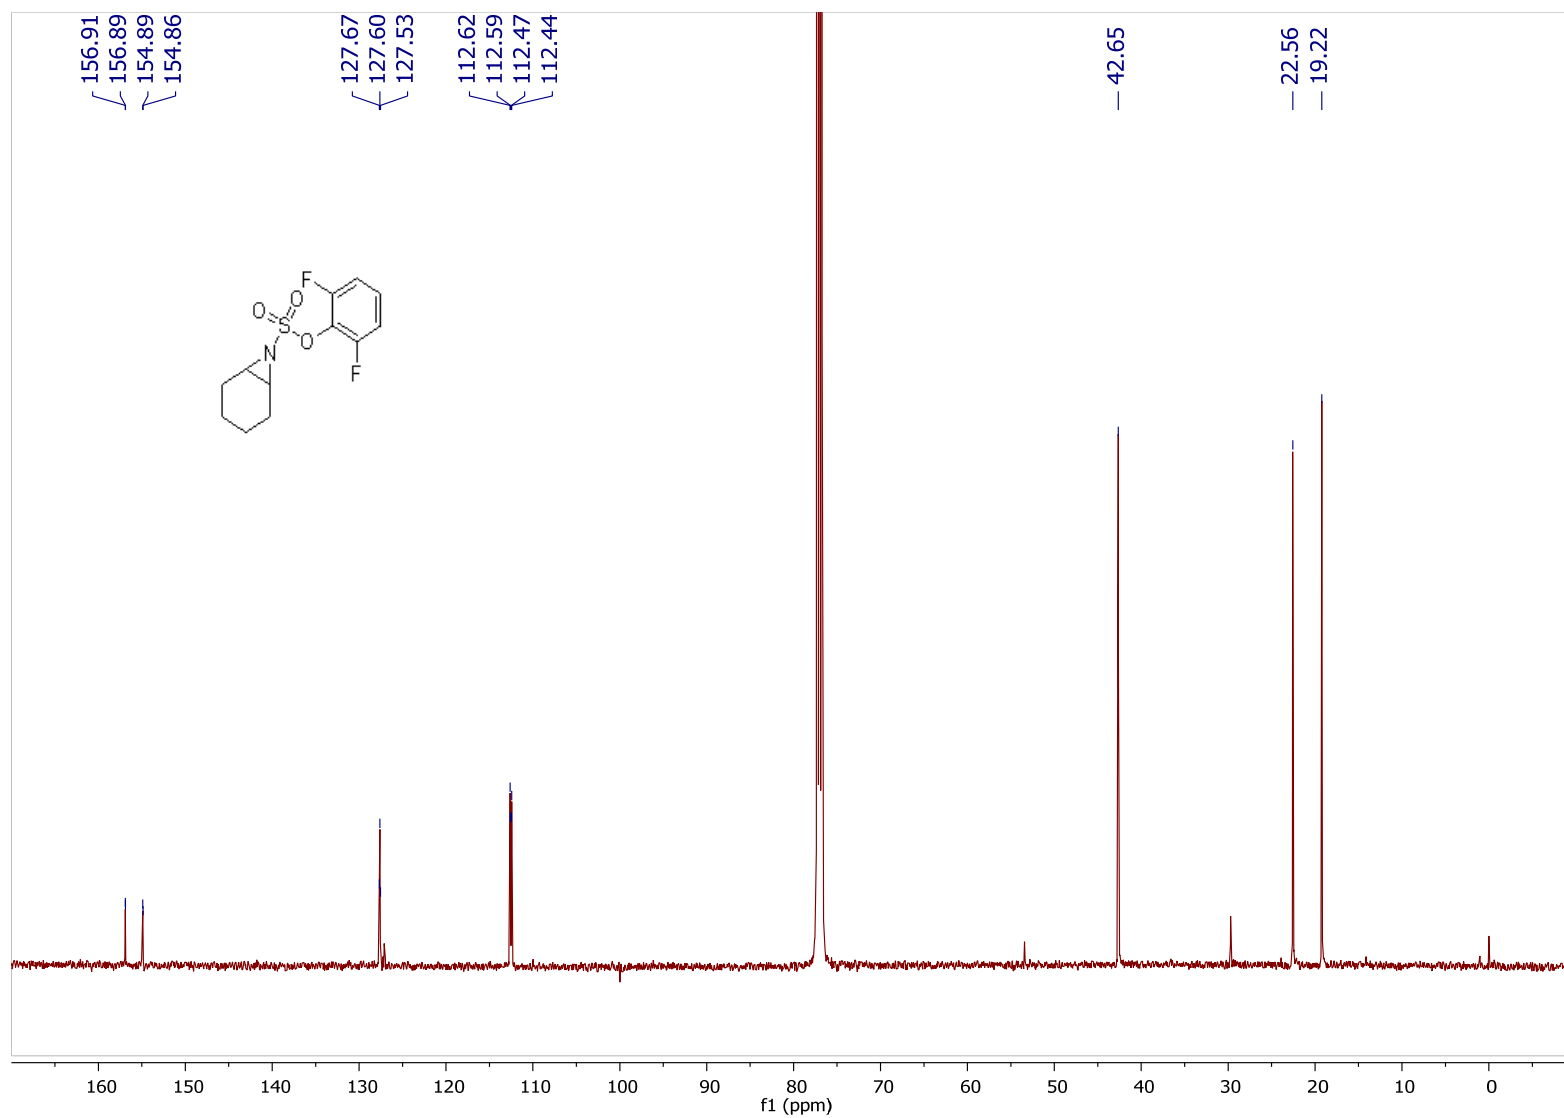

Compound 3d.

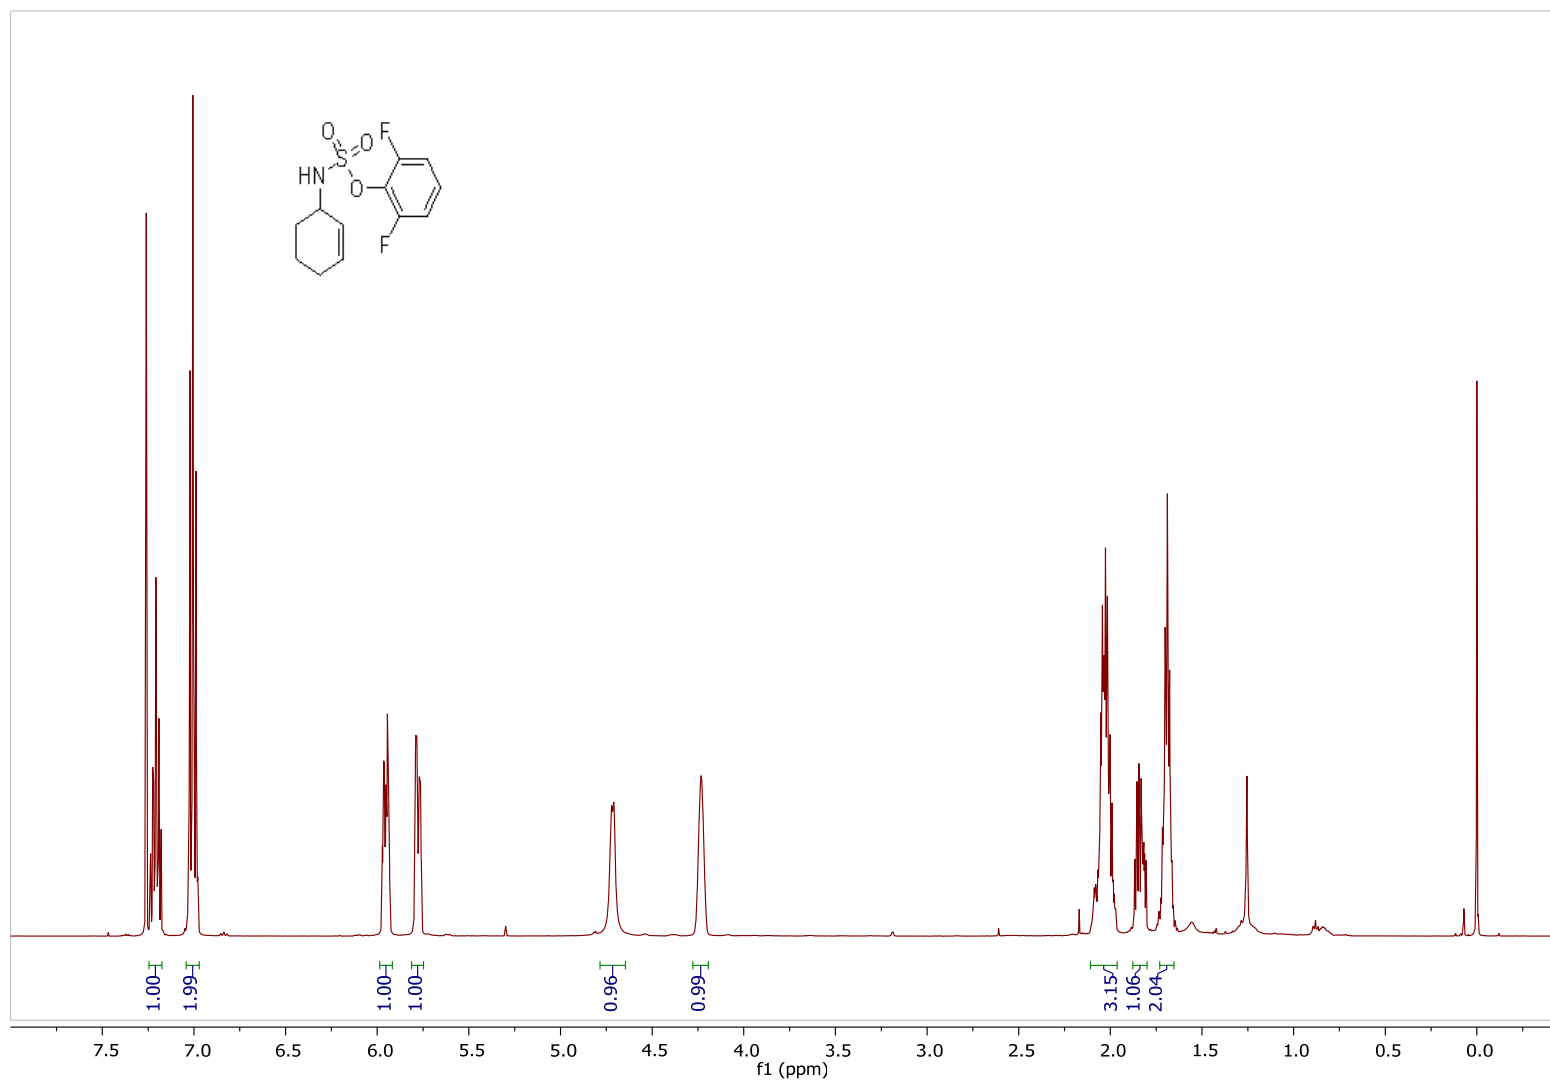

**Compound 3d.**

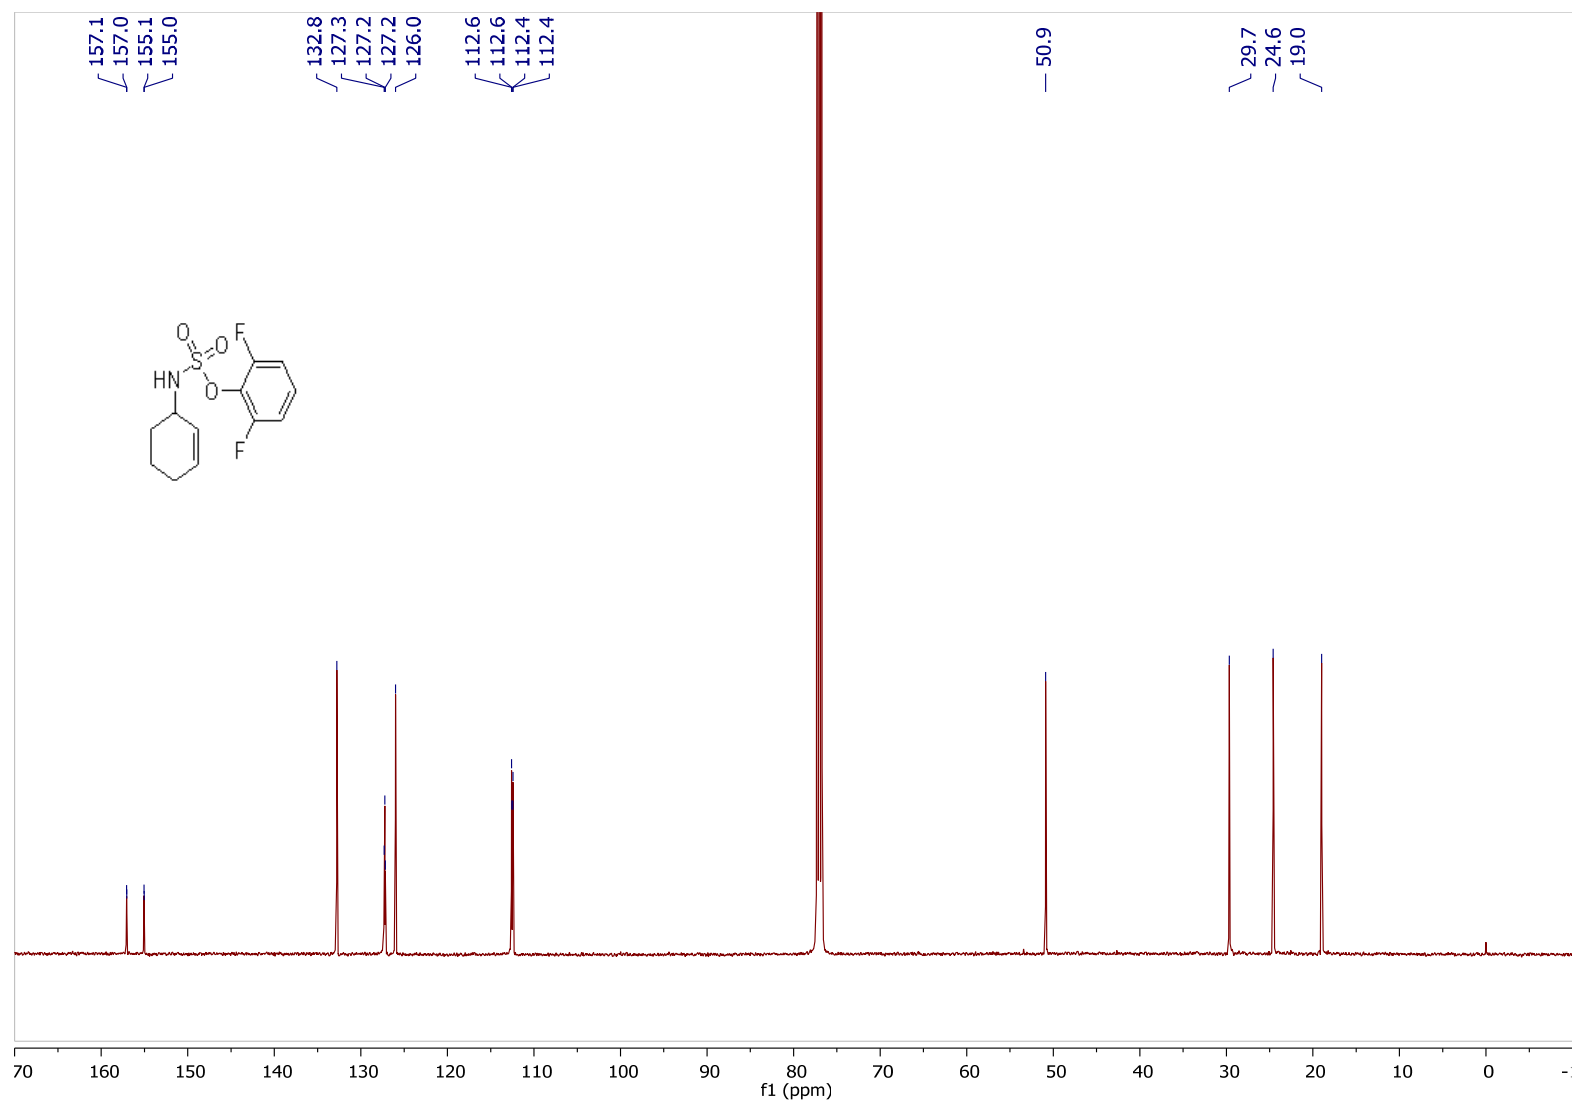

Compound 6a.

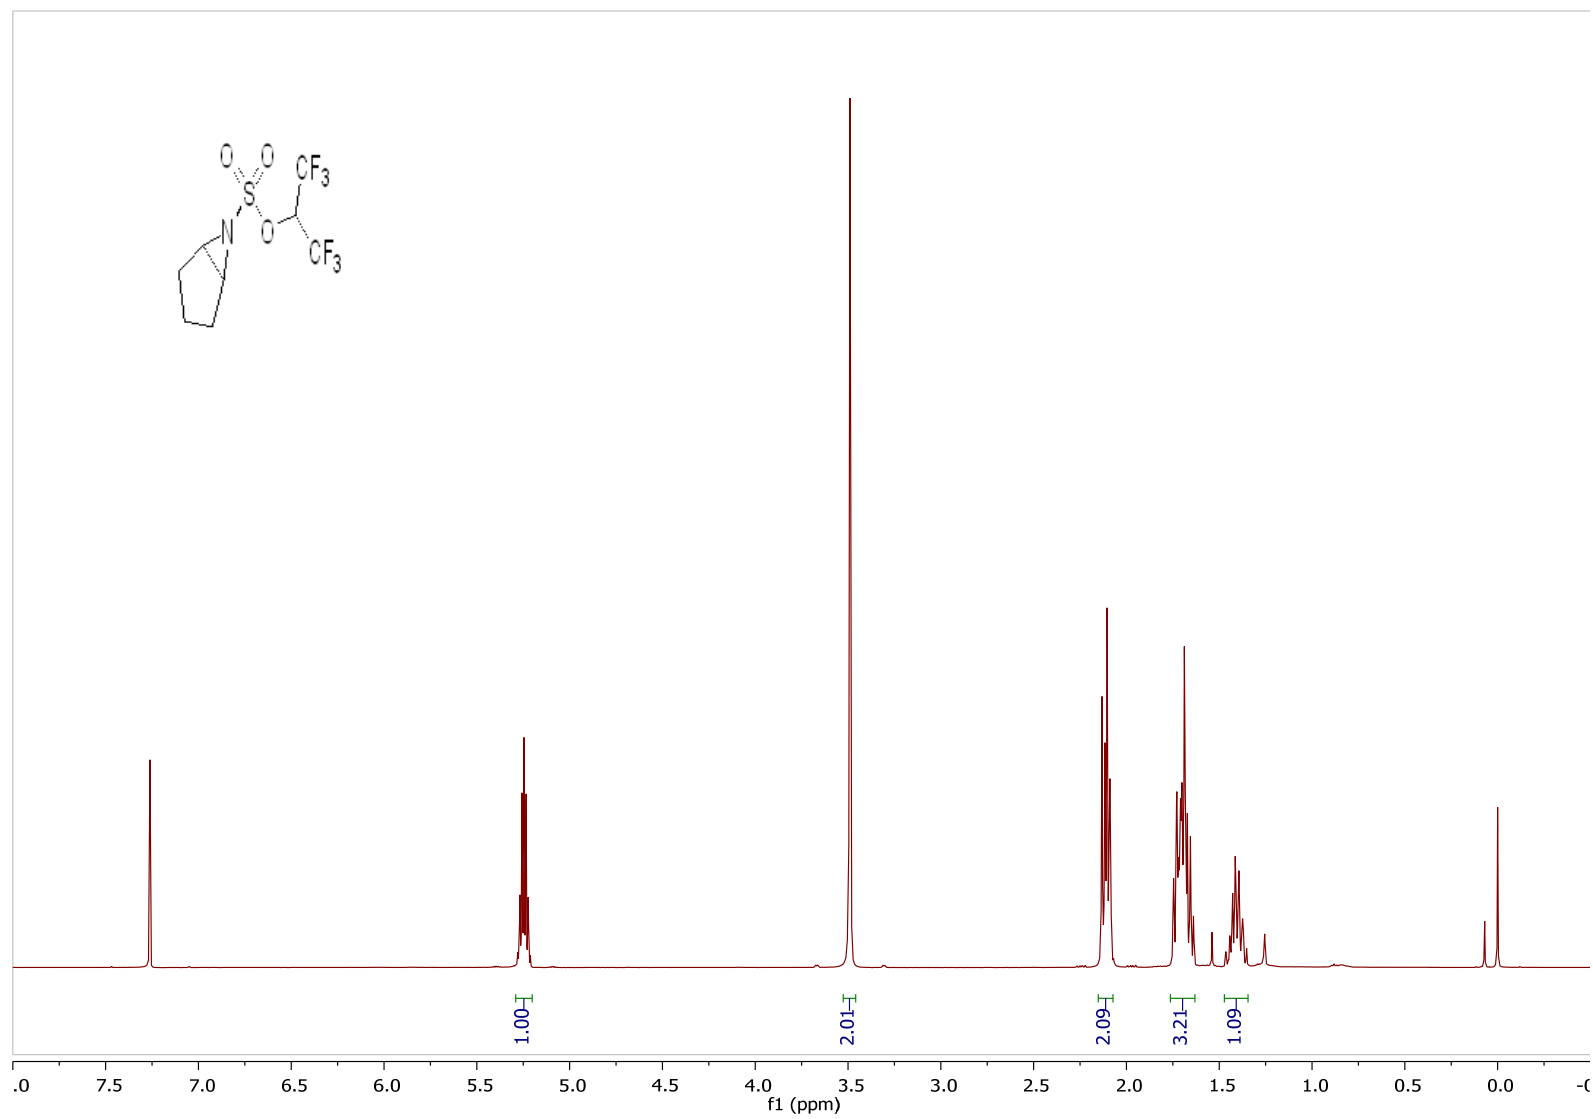



Compound 6a.

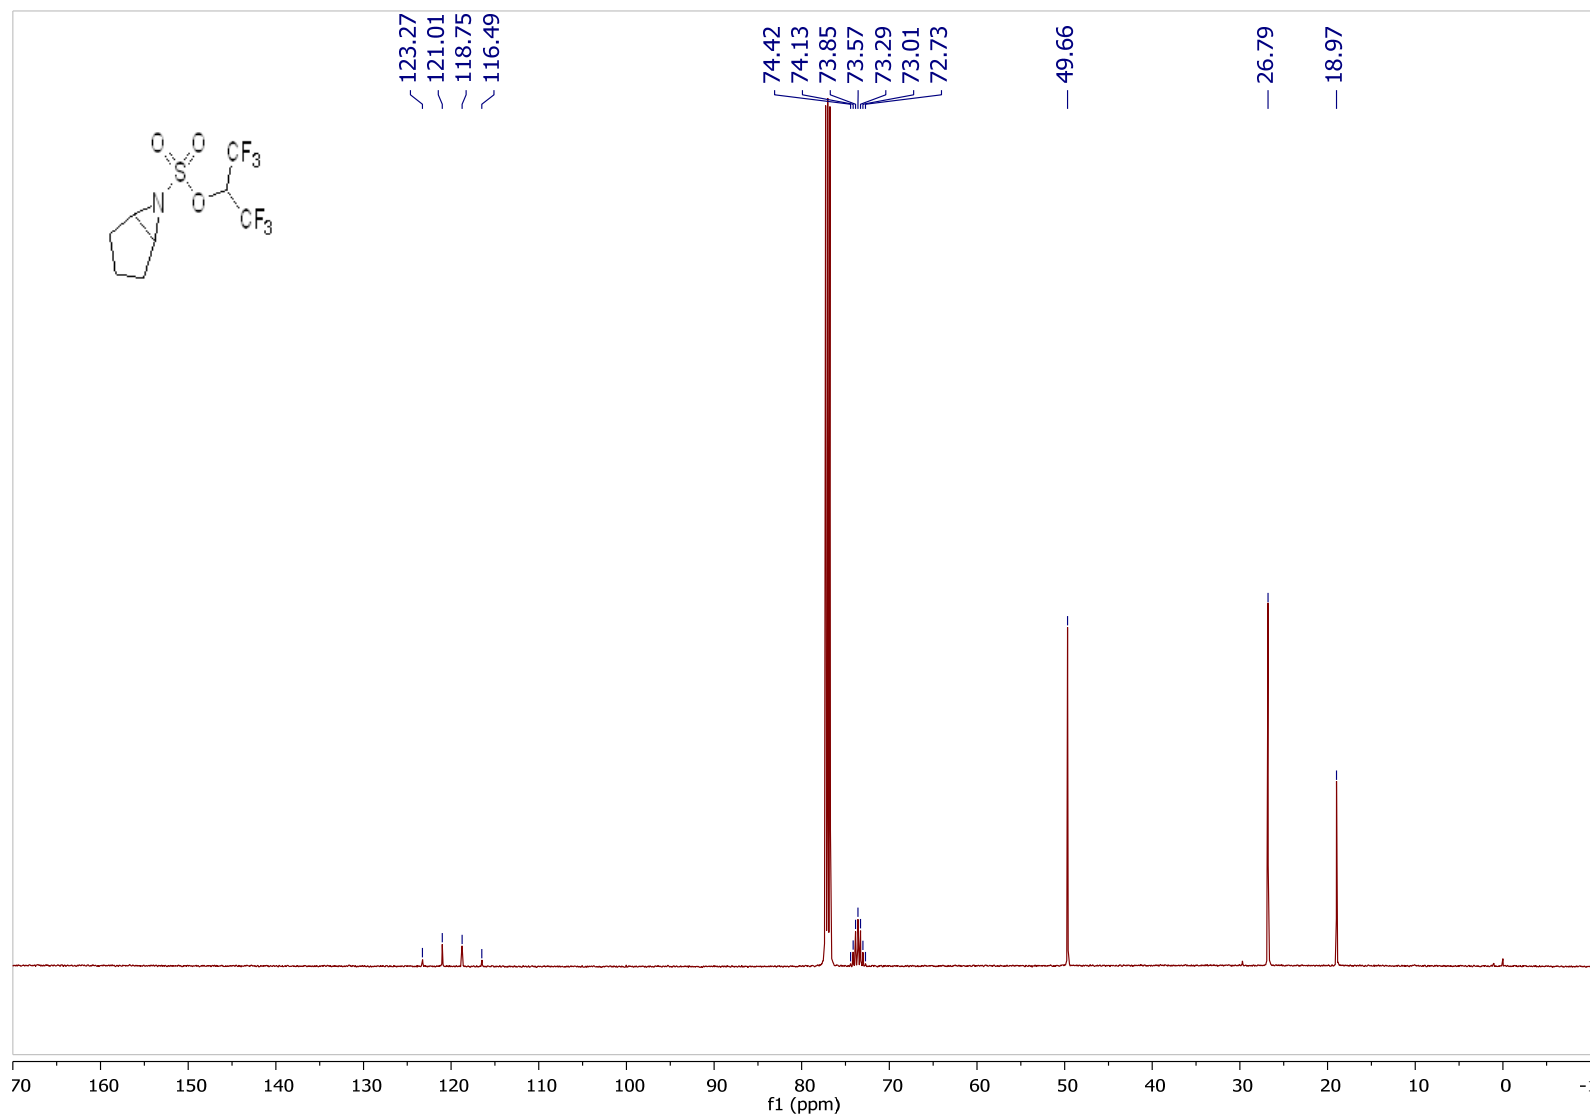

**Compound 6b.**

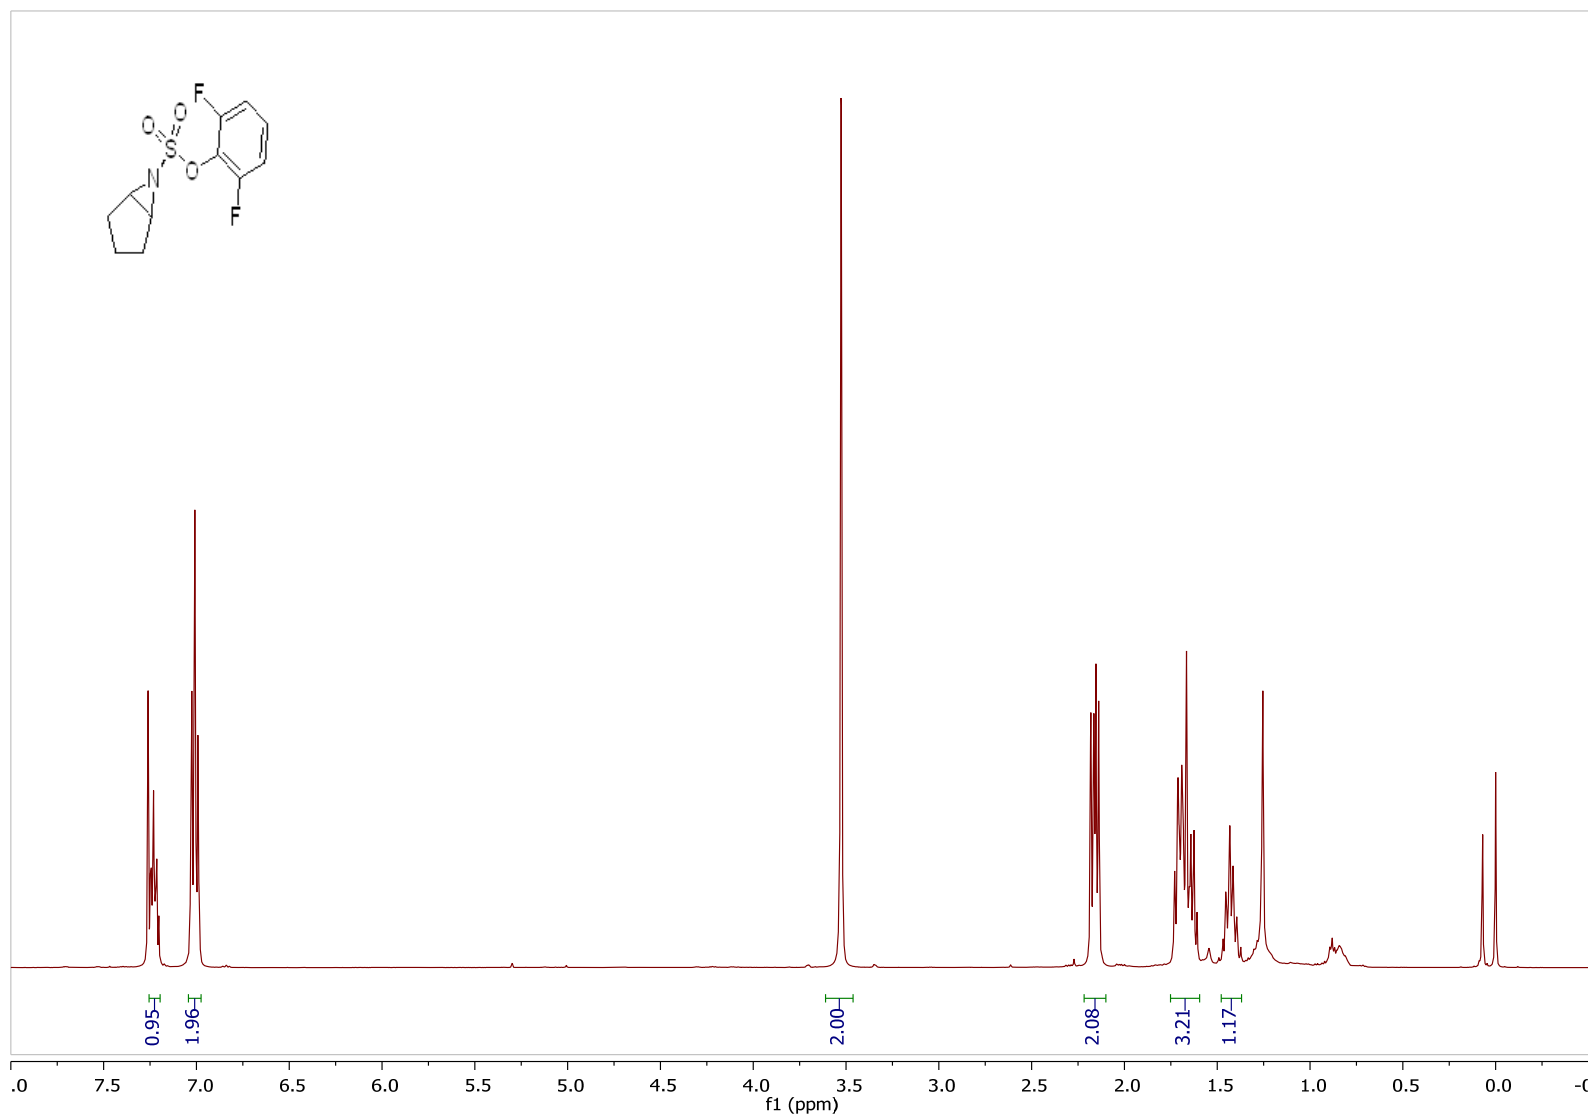

**Compound 6b.**

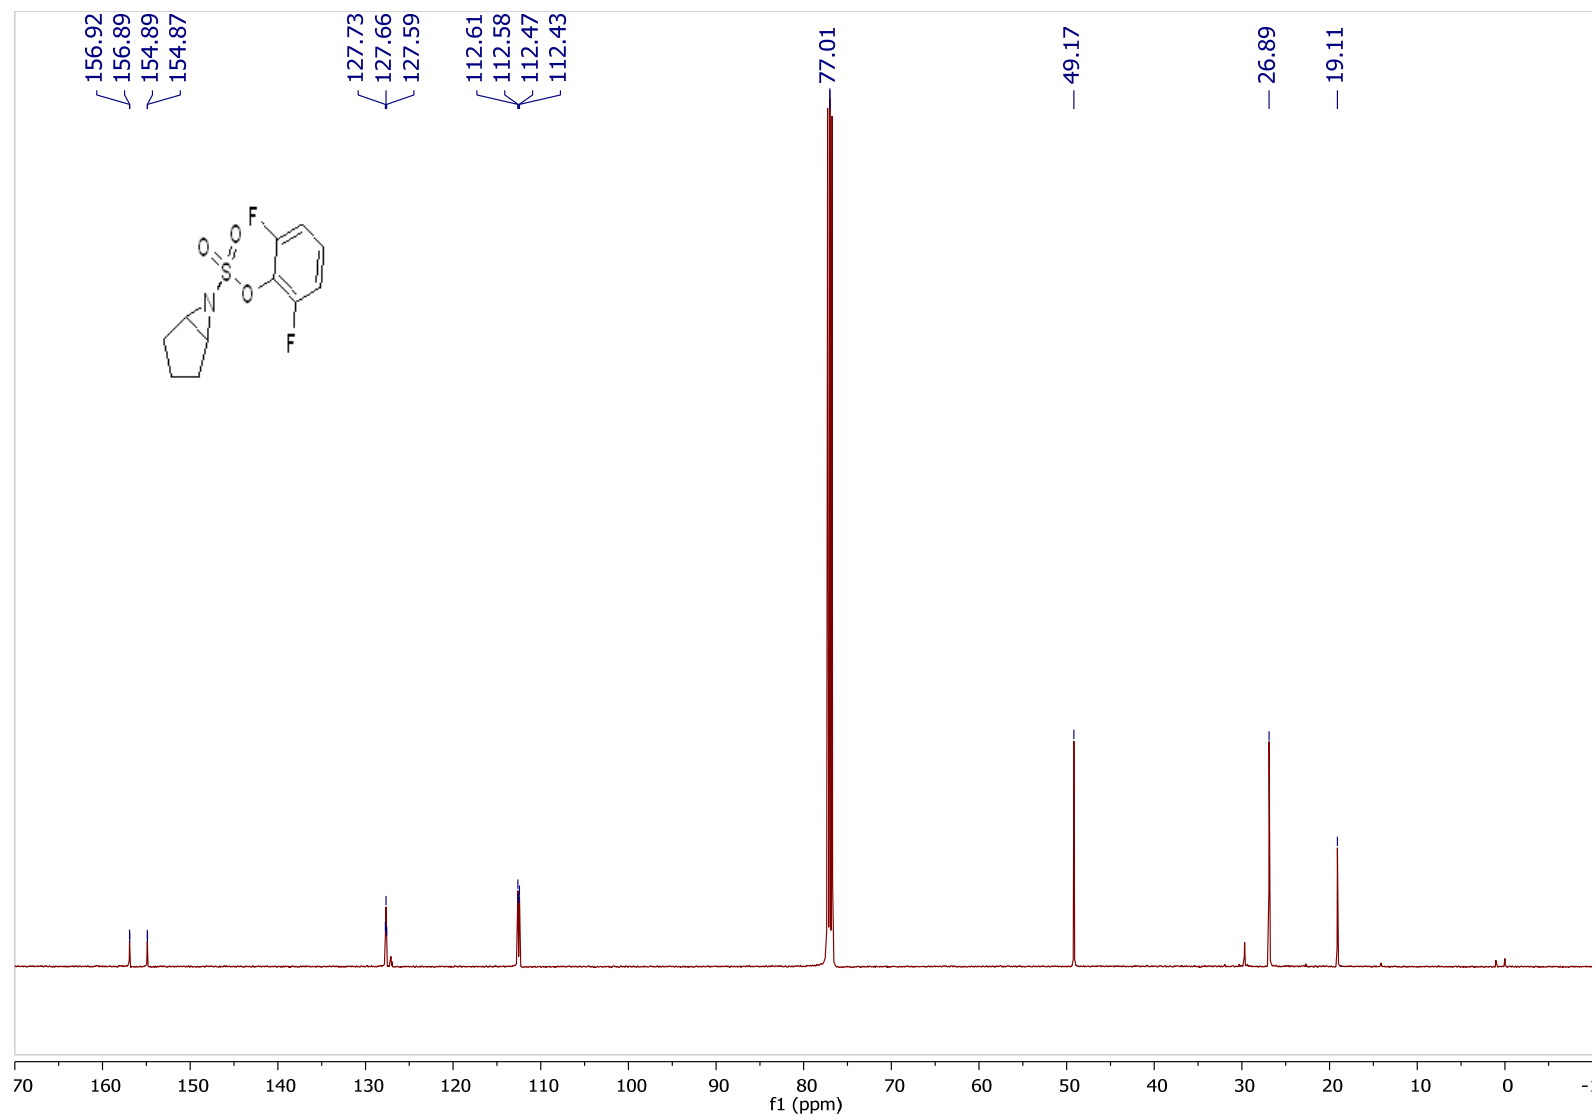

**Compound 6d.**

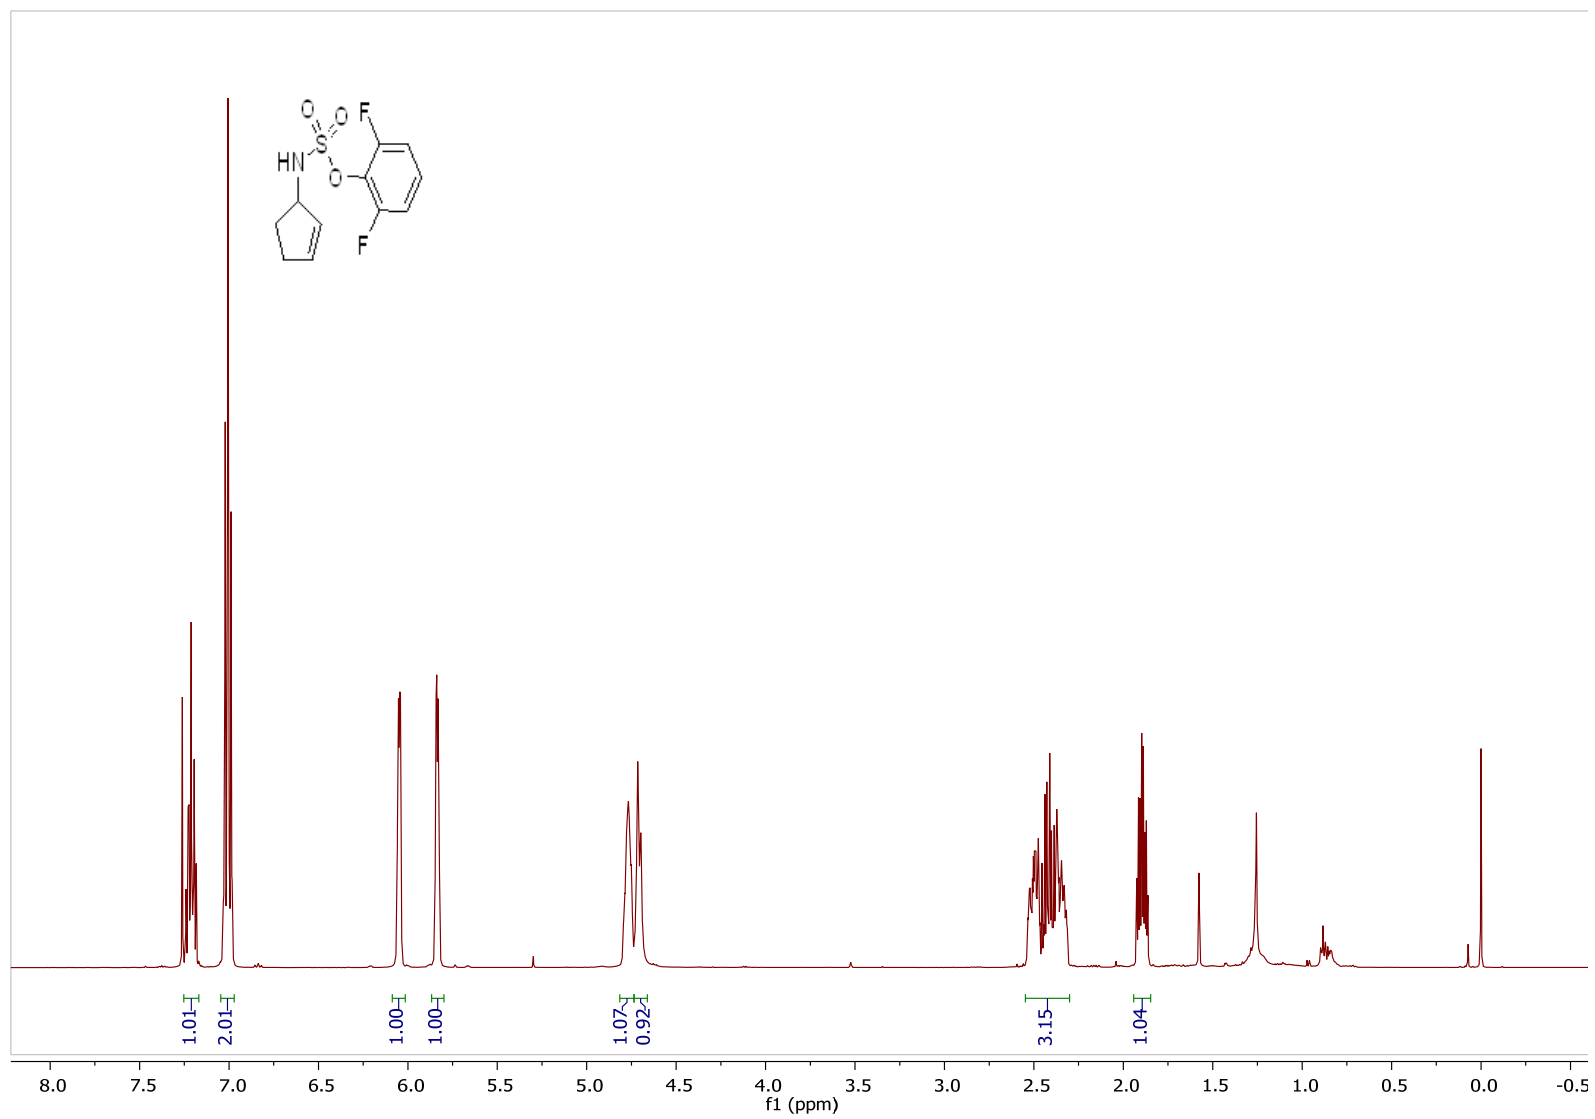

**Compound 6d.**

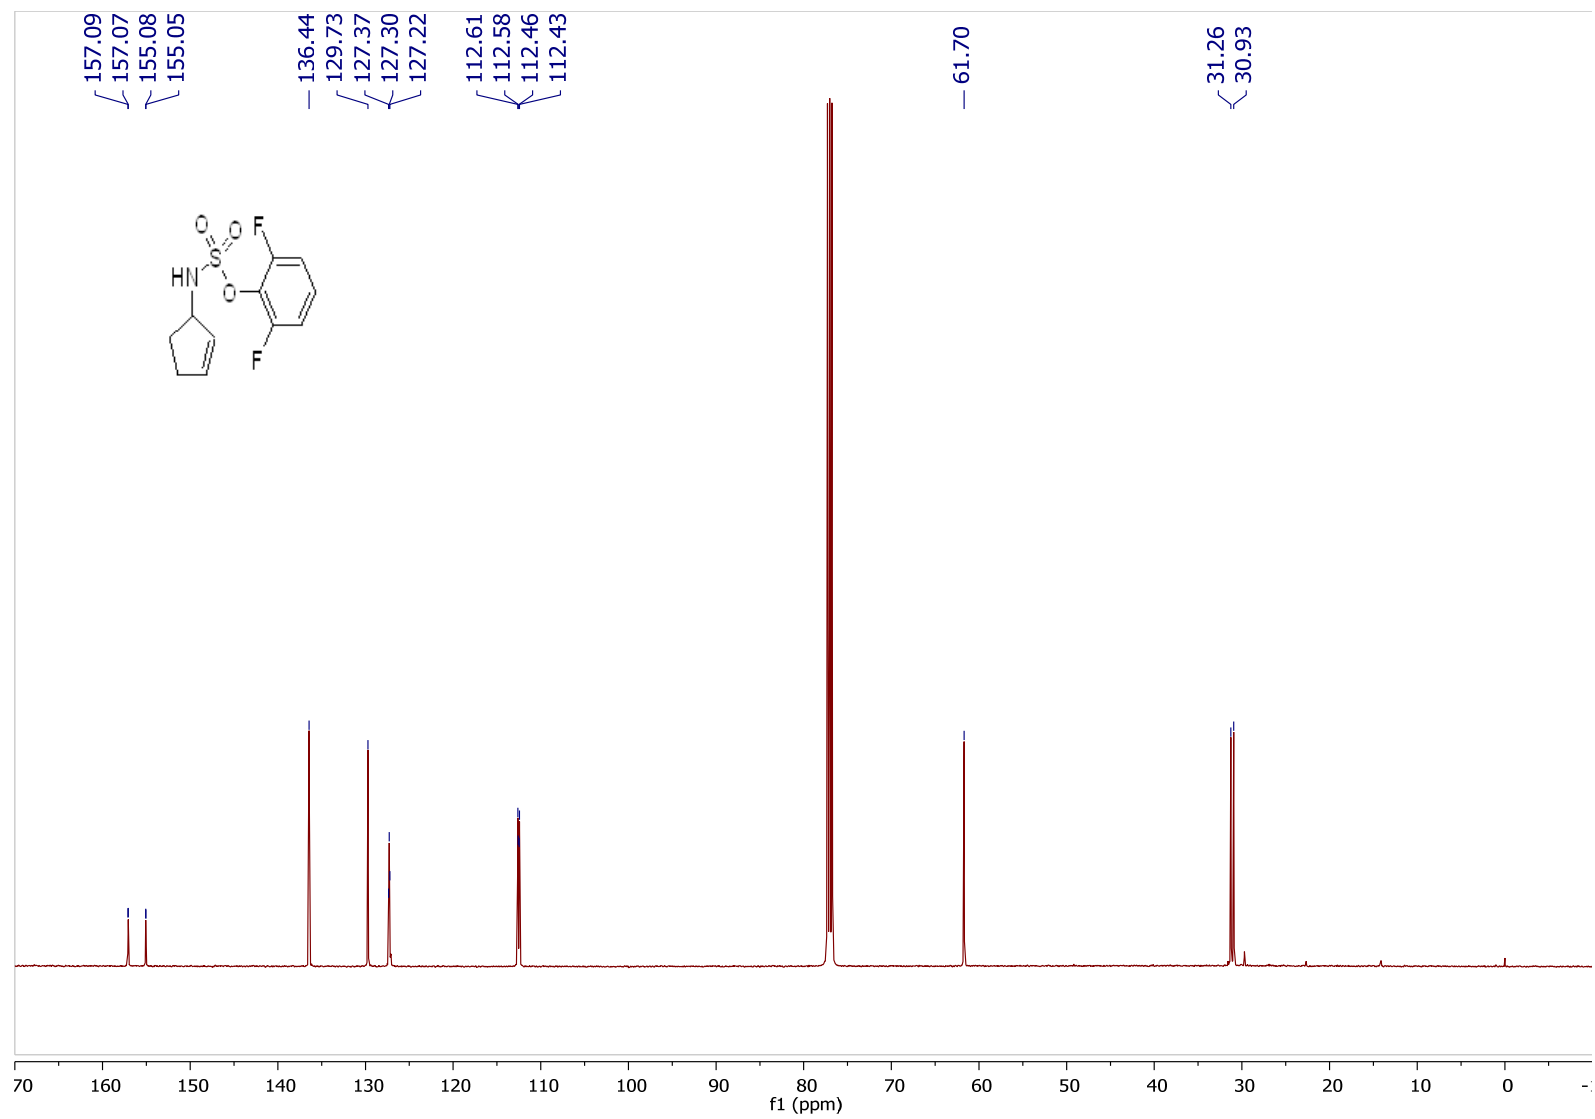

Compound 7a.

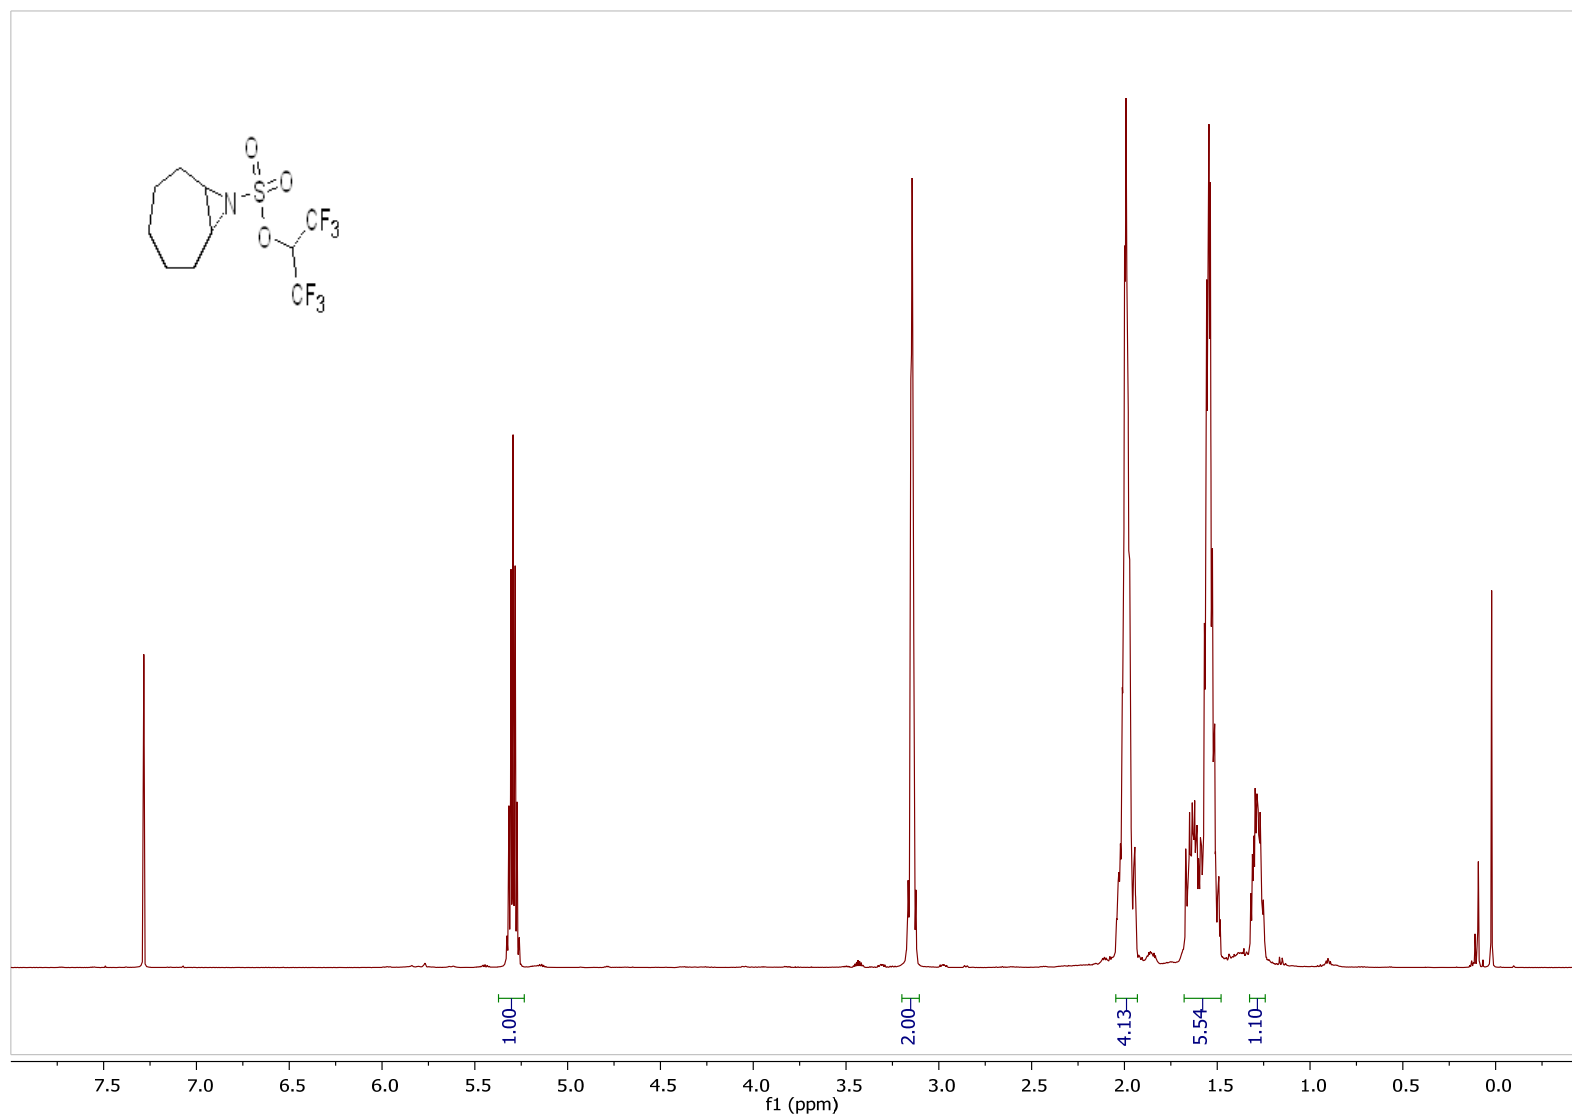

Compound 7a.

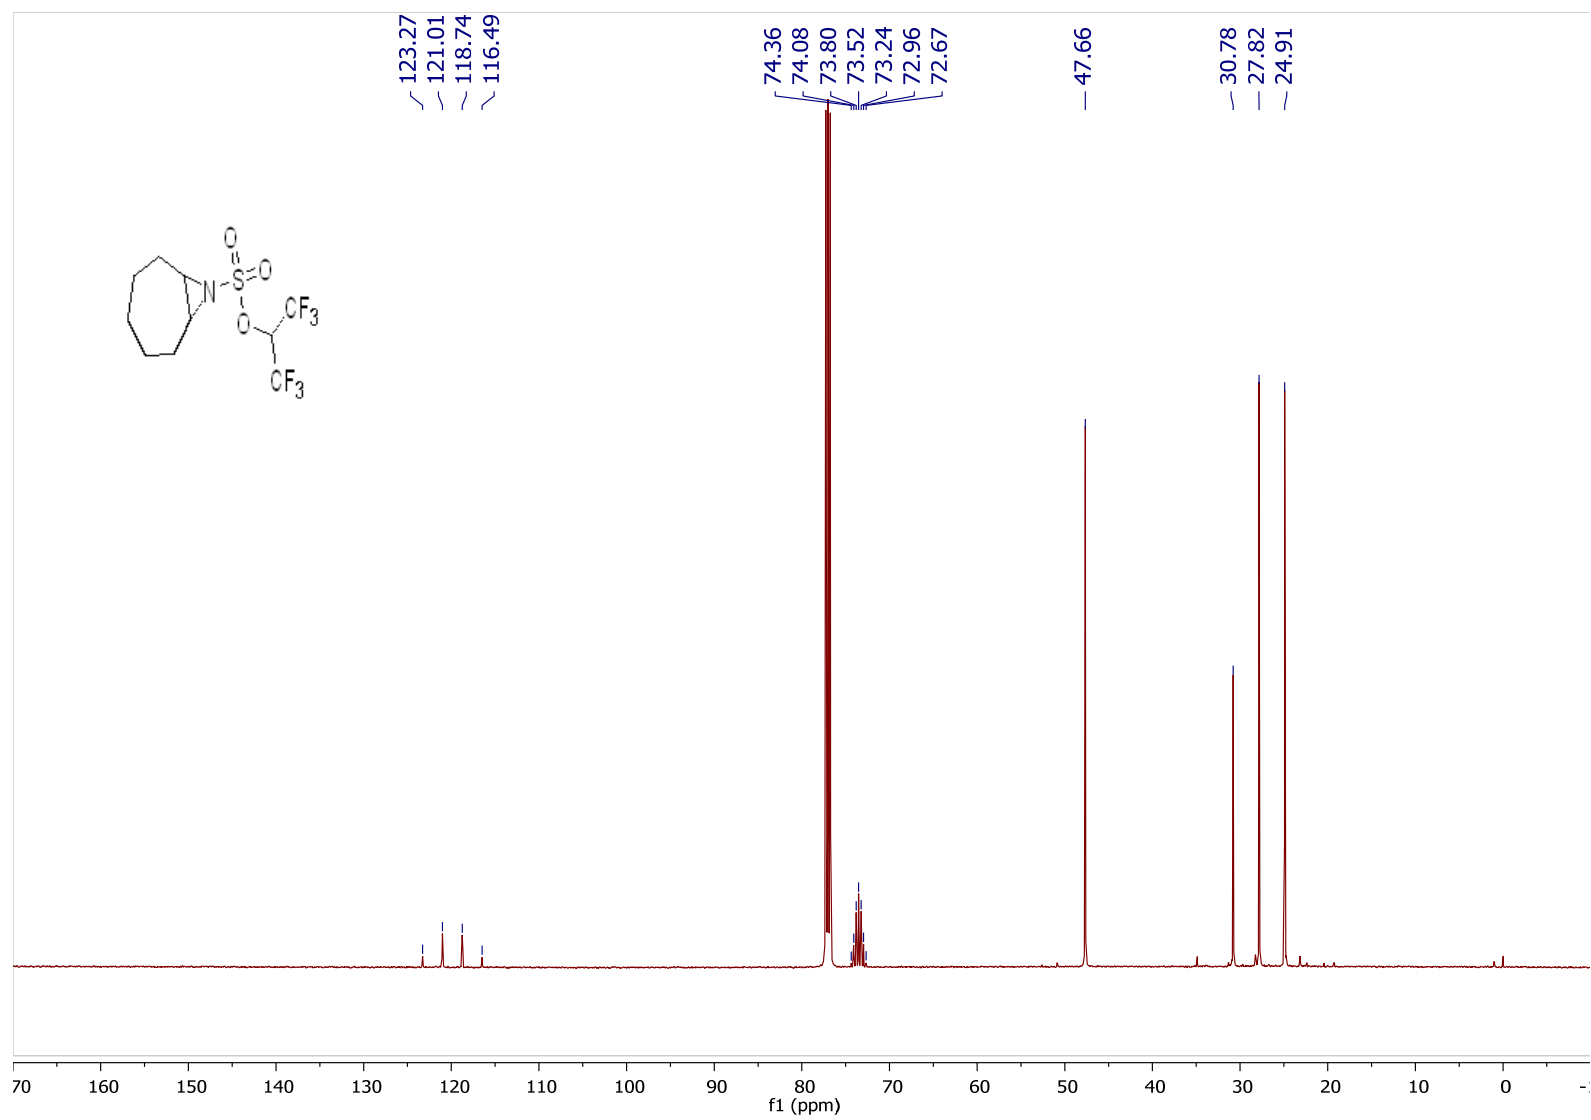

**Compound 7b.**

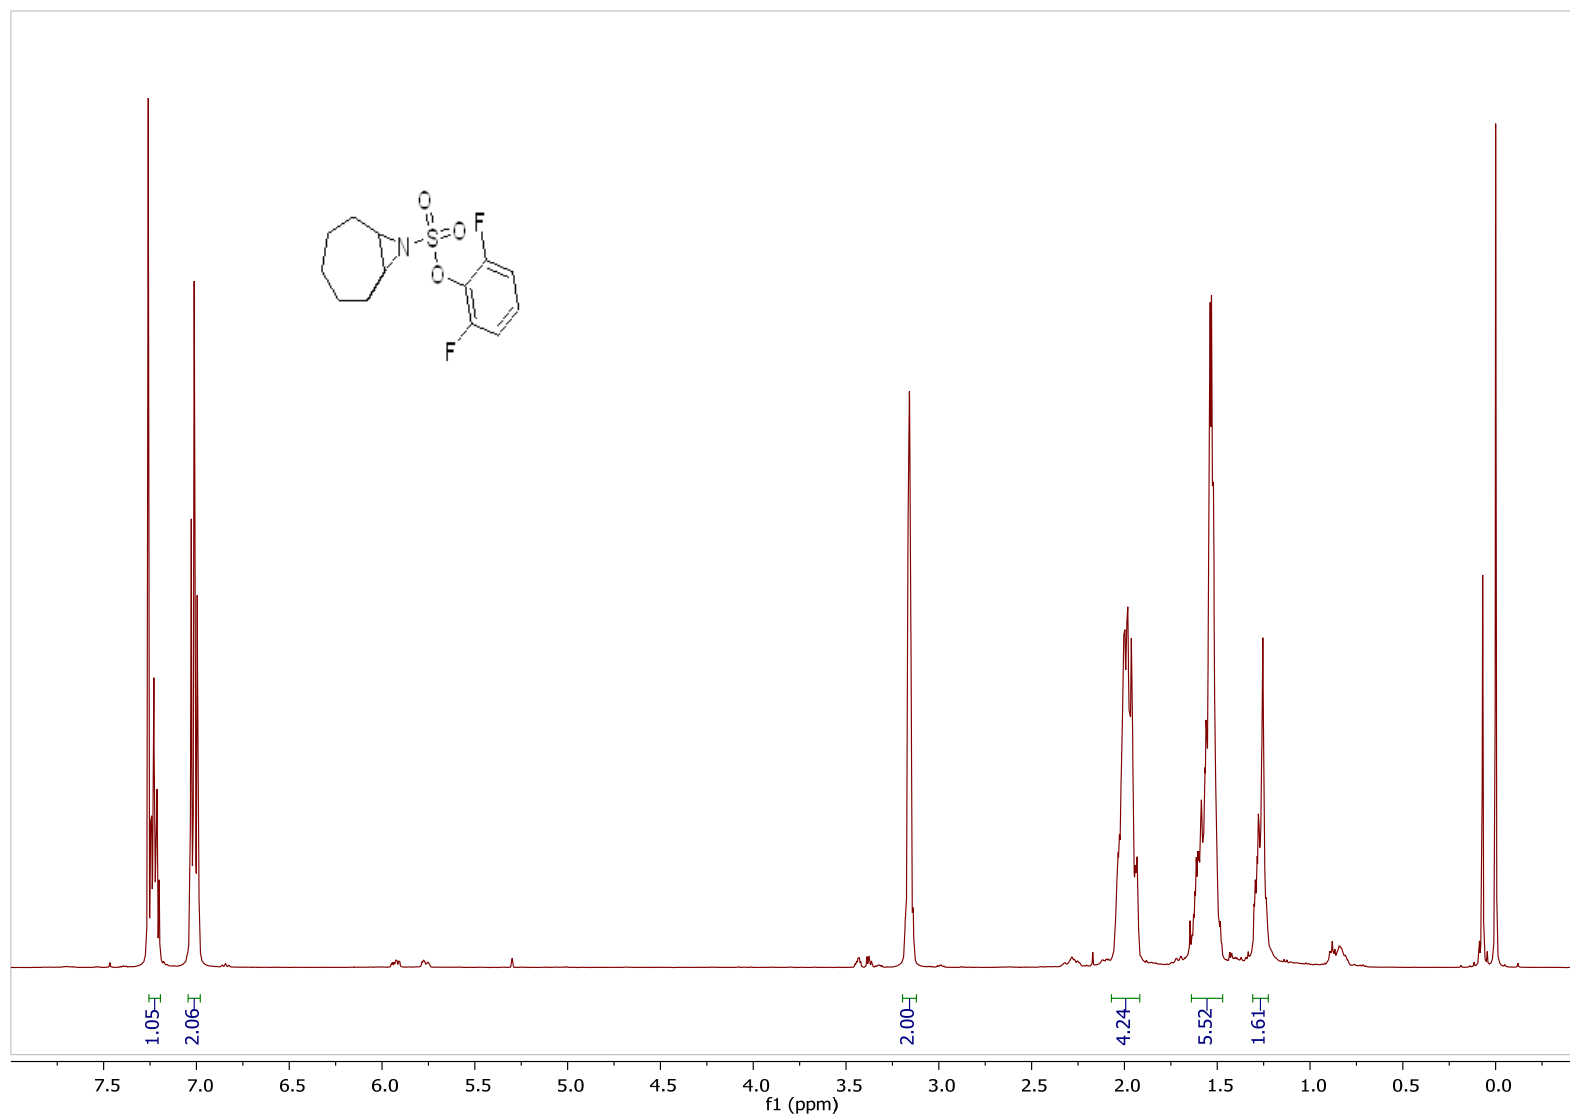



**Compound 7b.**

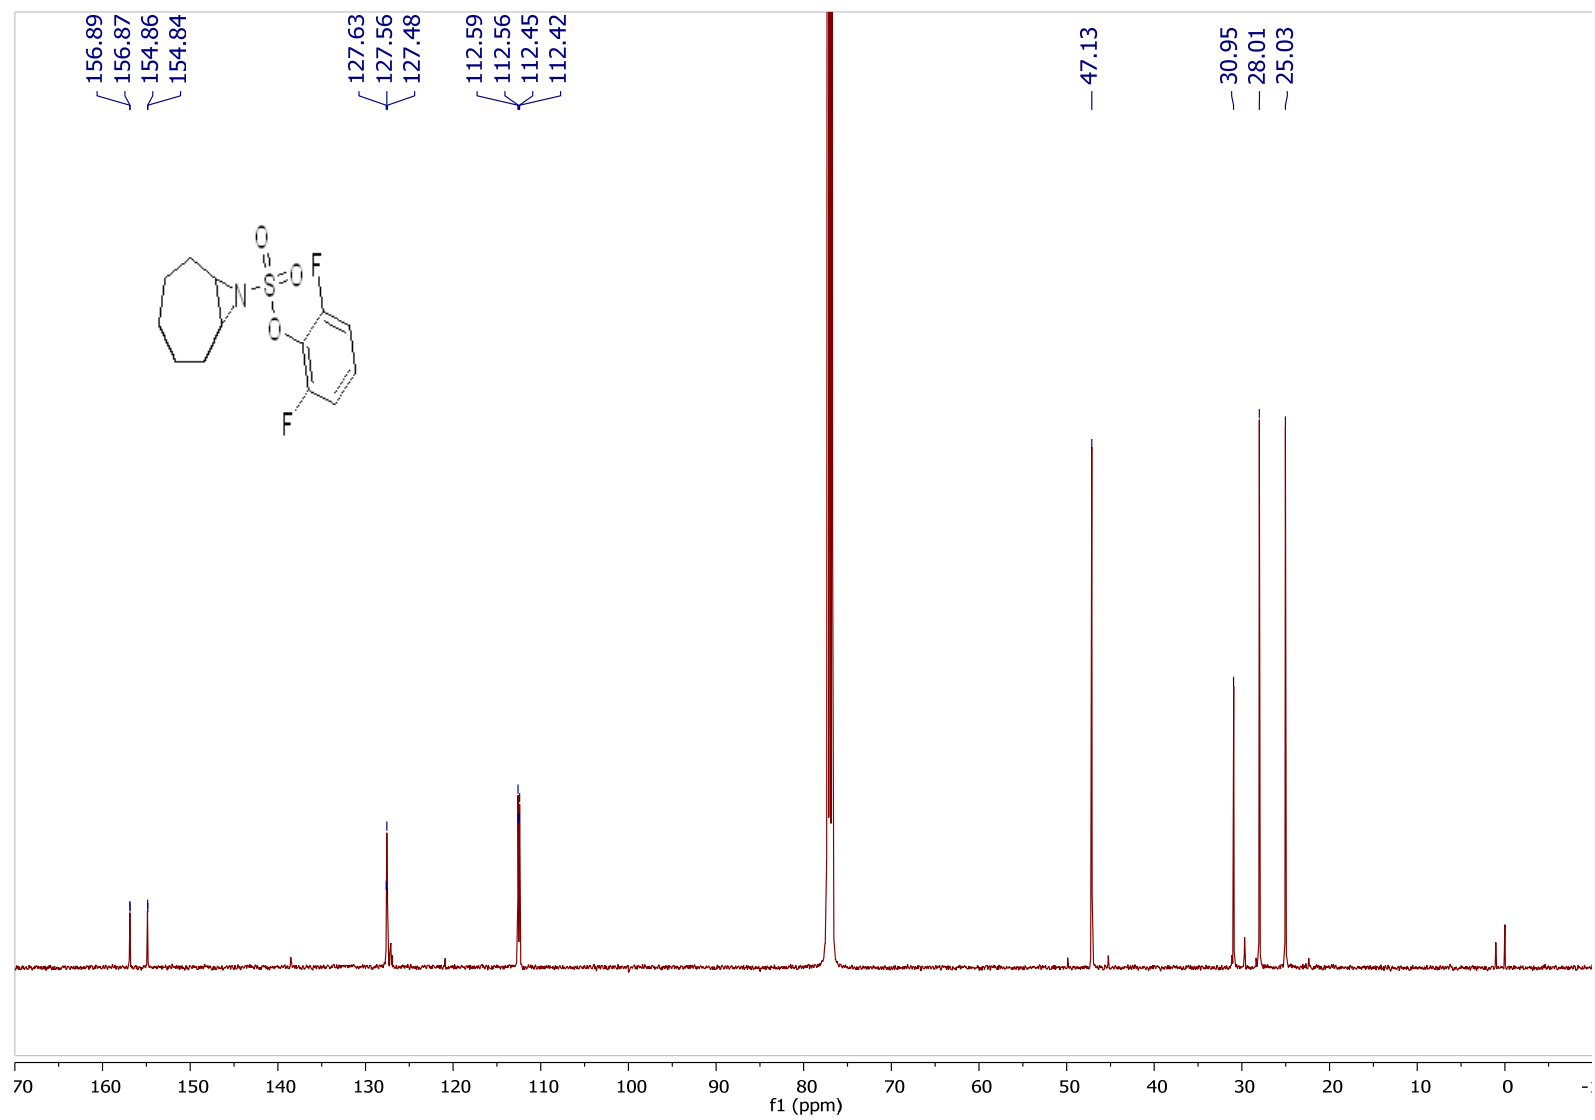

Compound 7d.

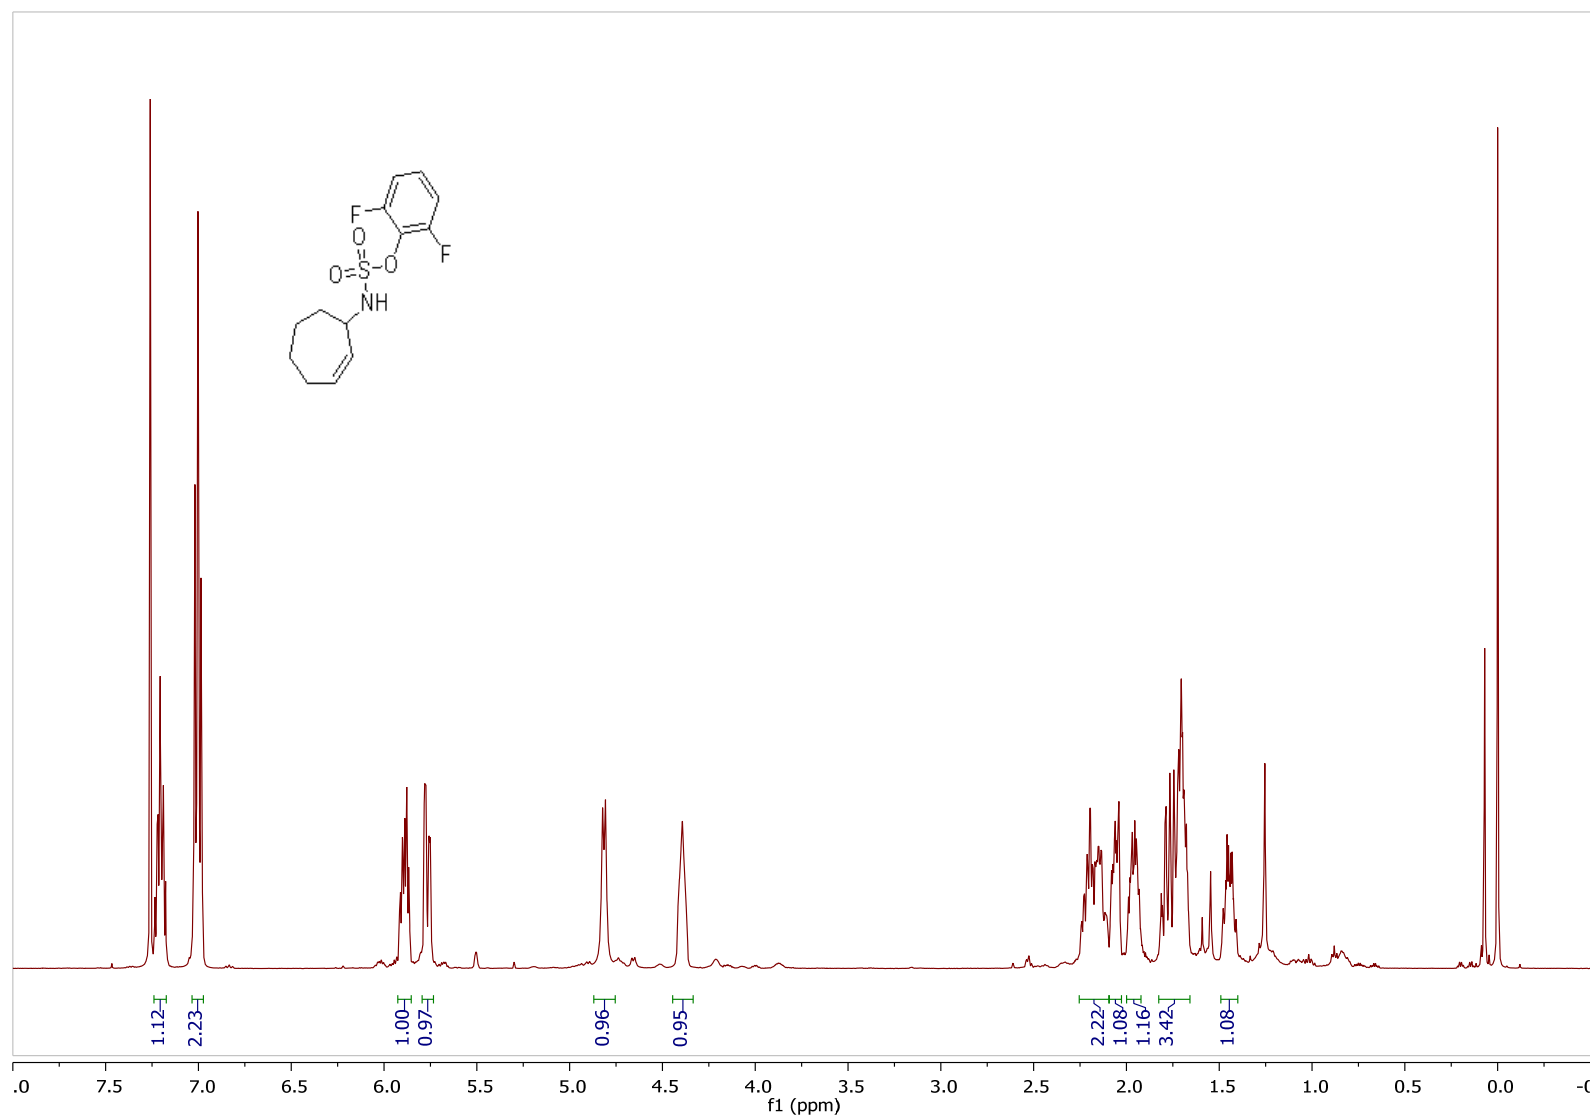

Compound 7d.

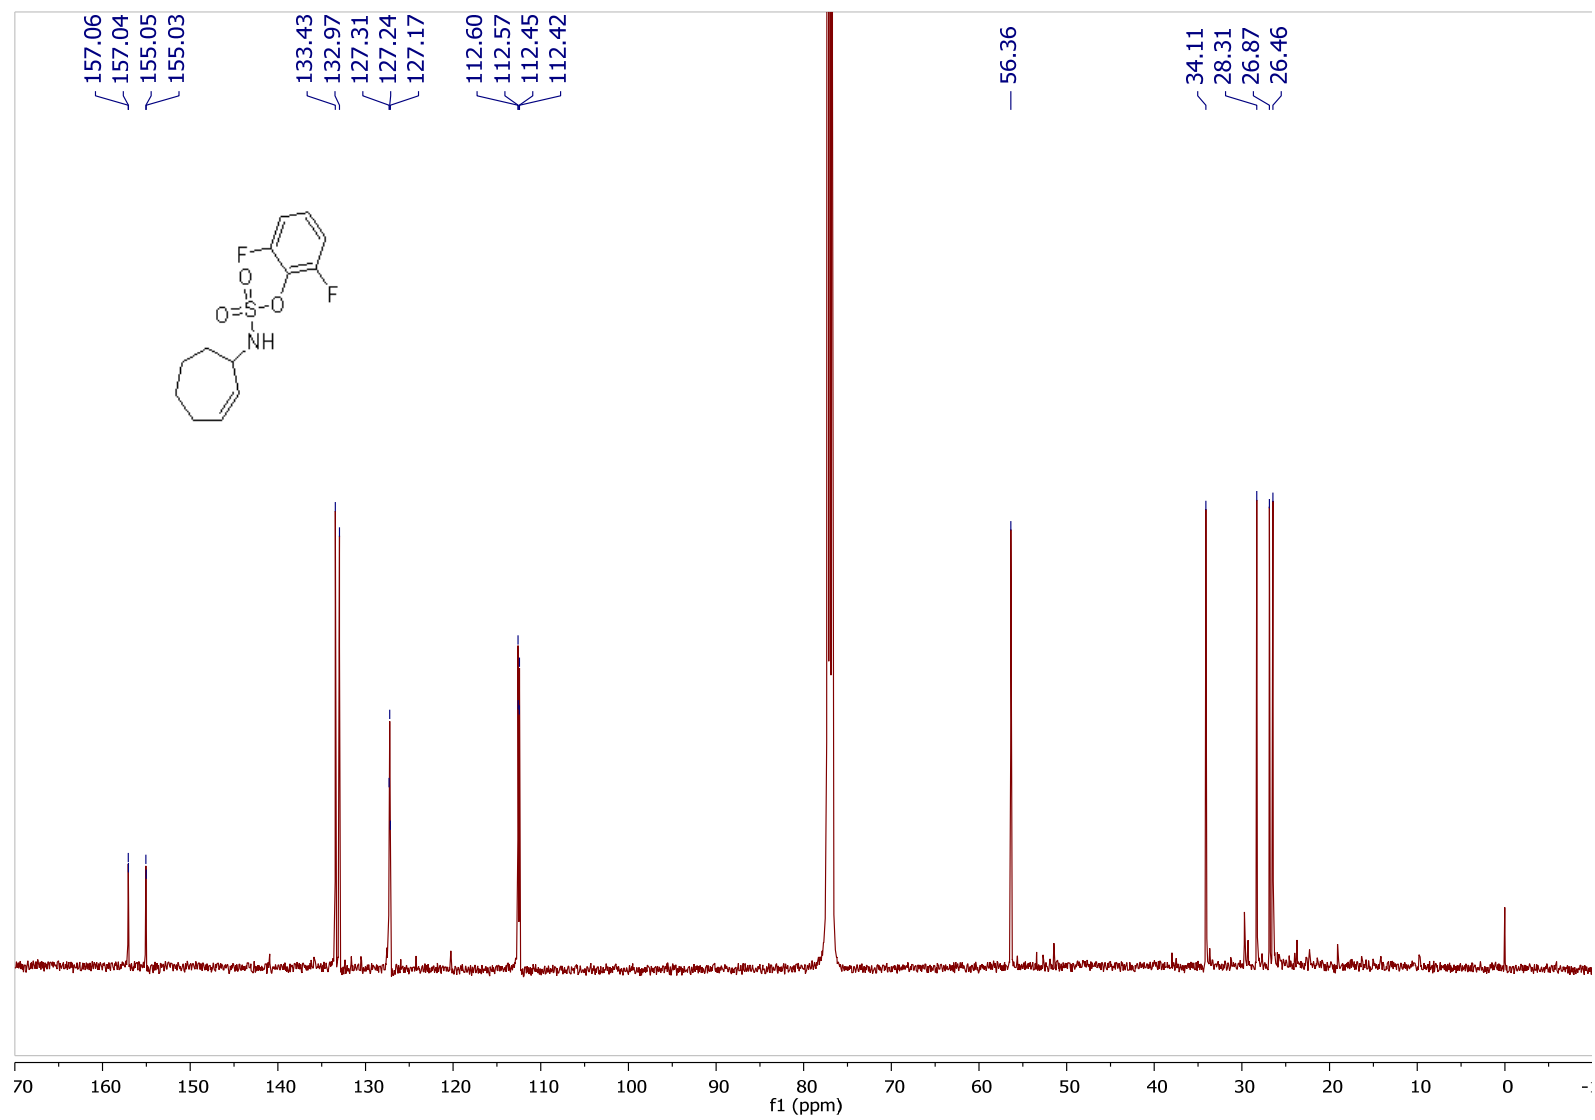

Compound *syn-8a*.

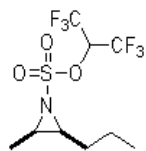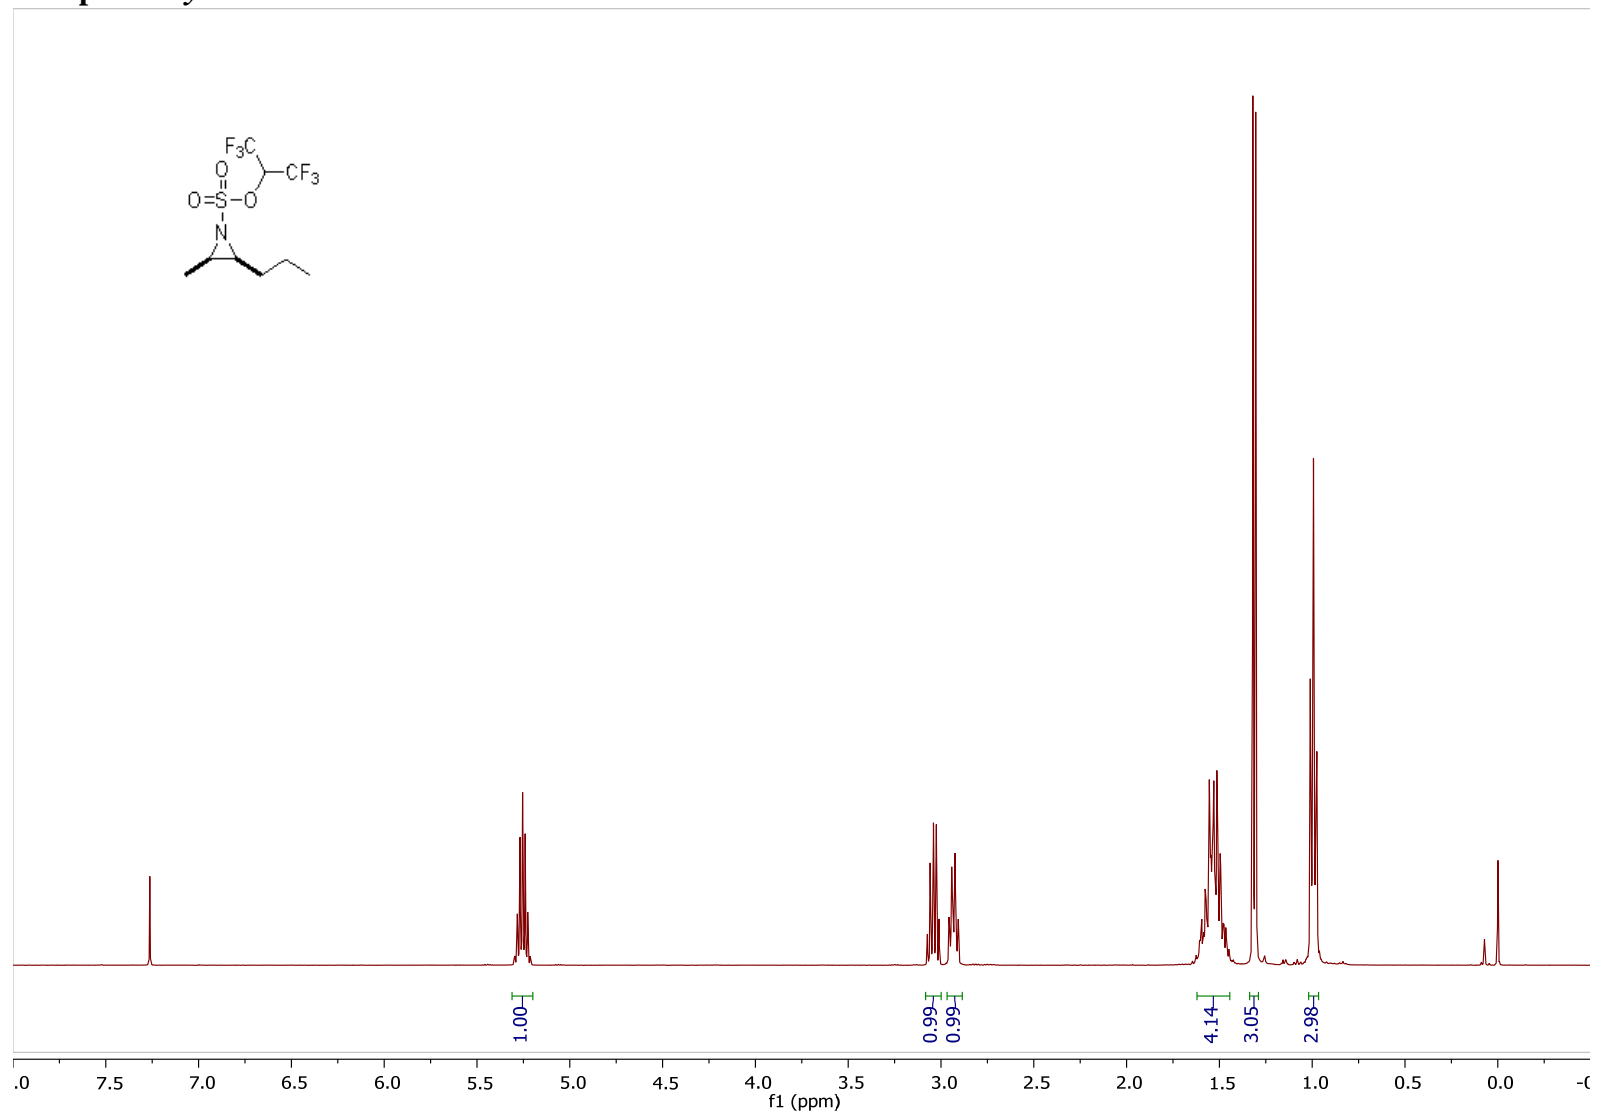

Compound *syn-8a*.

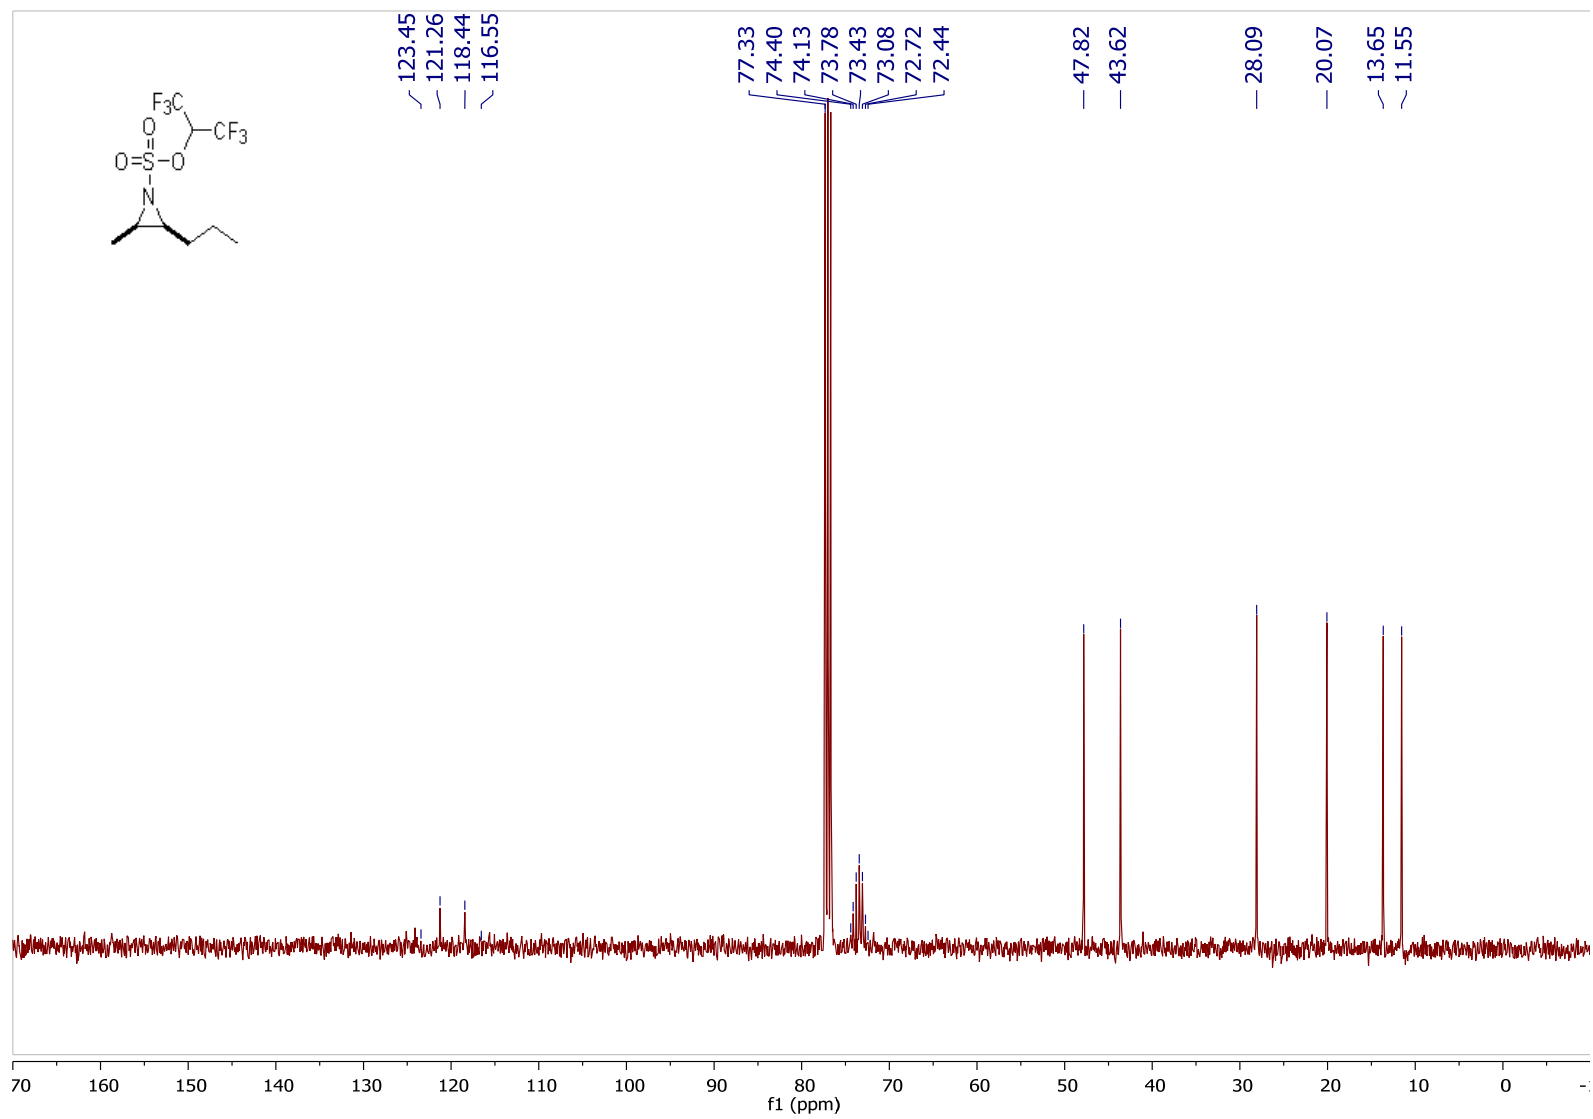

Compound *syn*-8b.

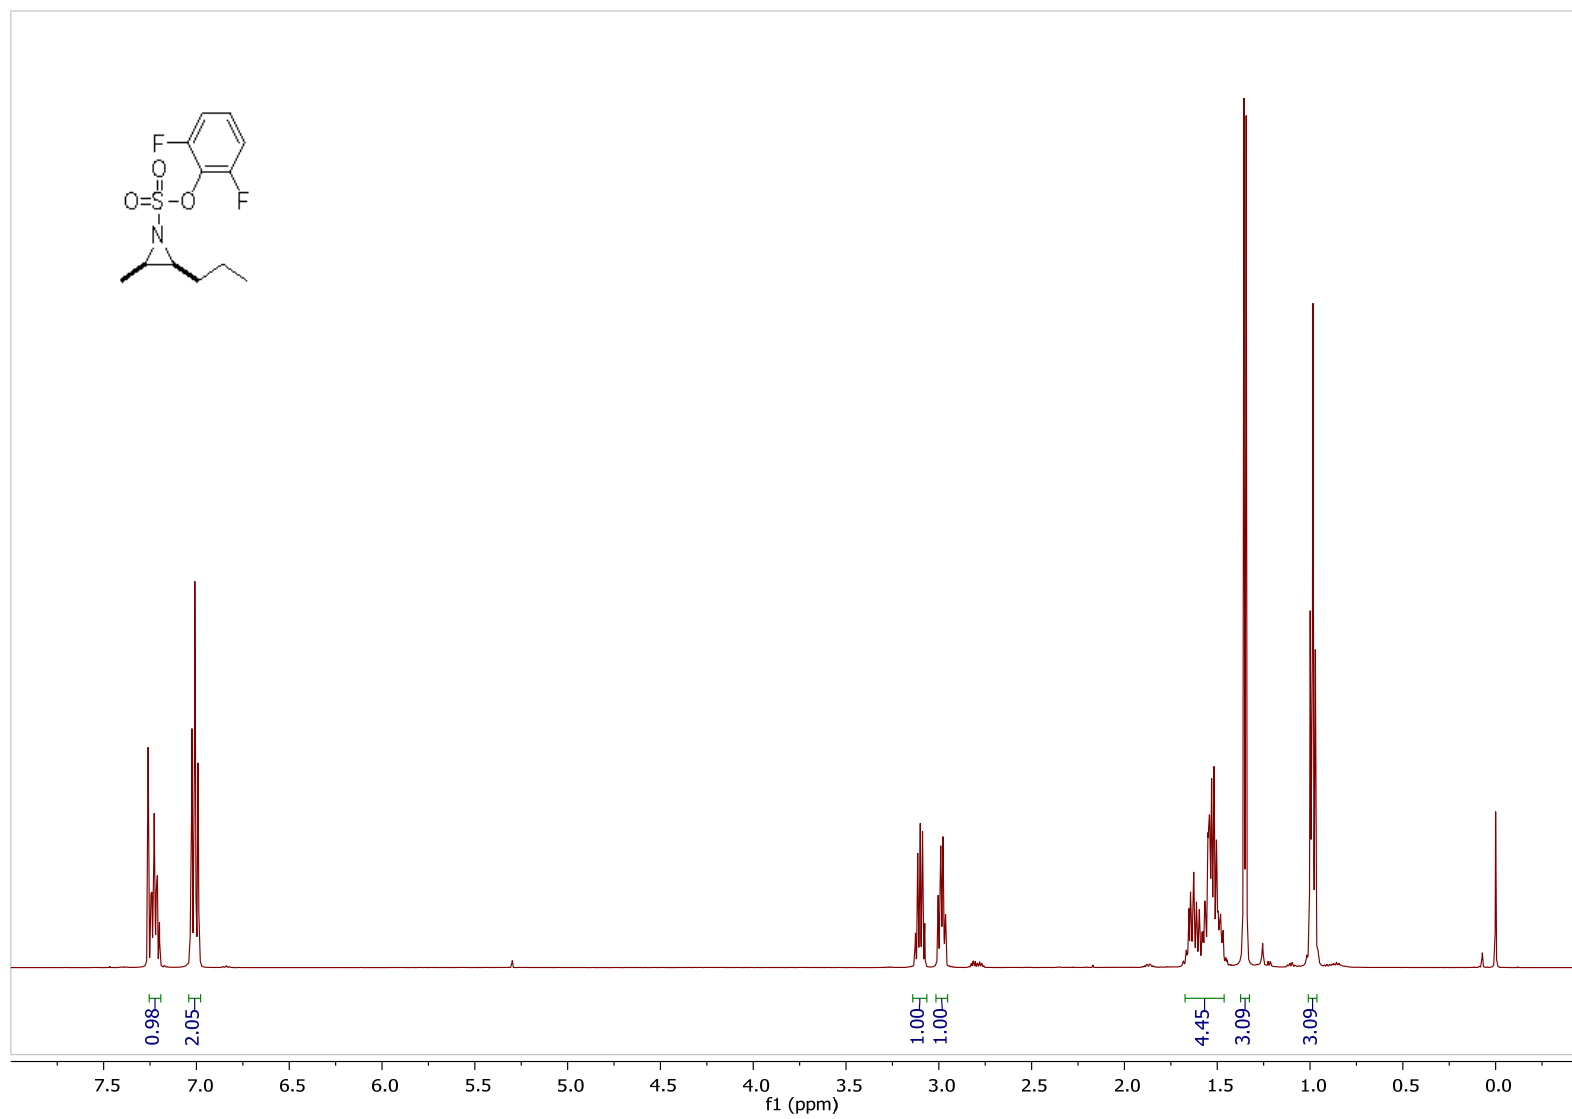

Compound *syn*-8b.

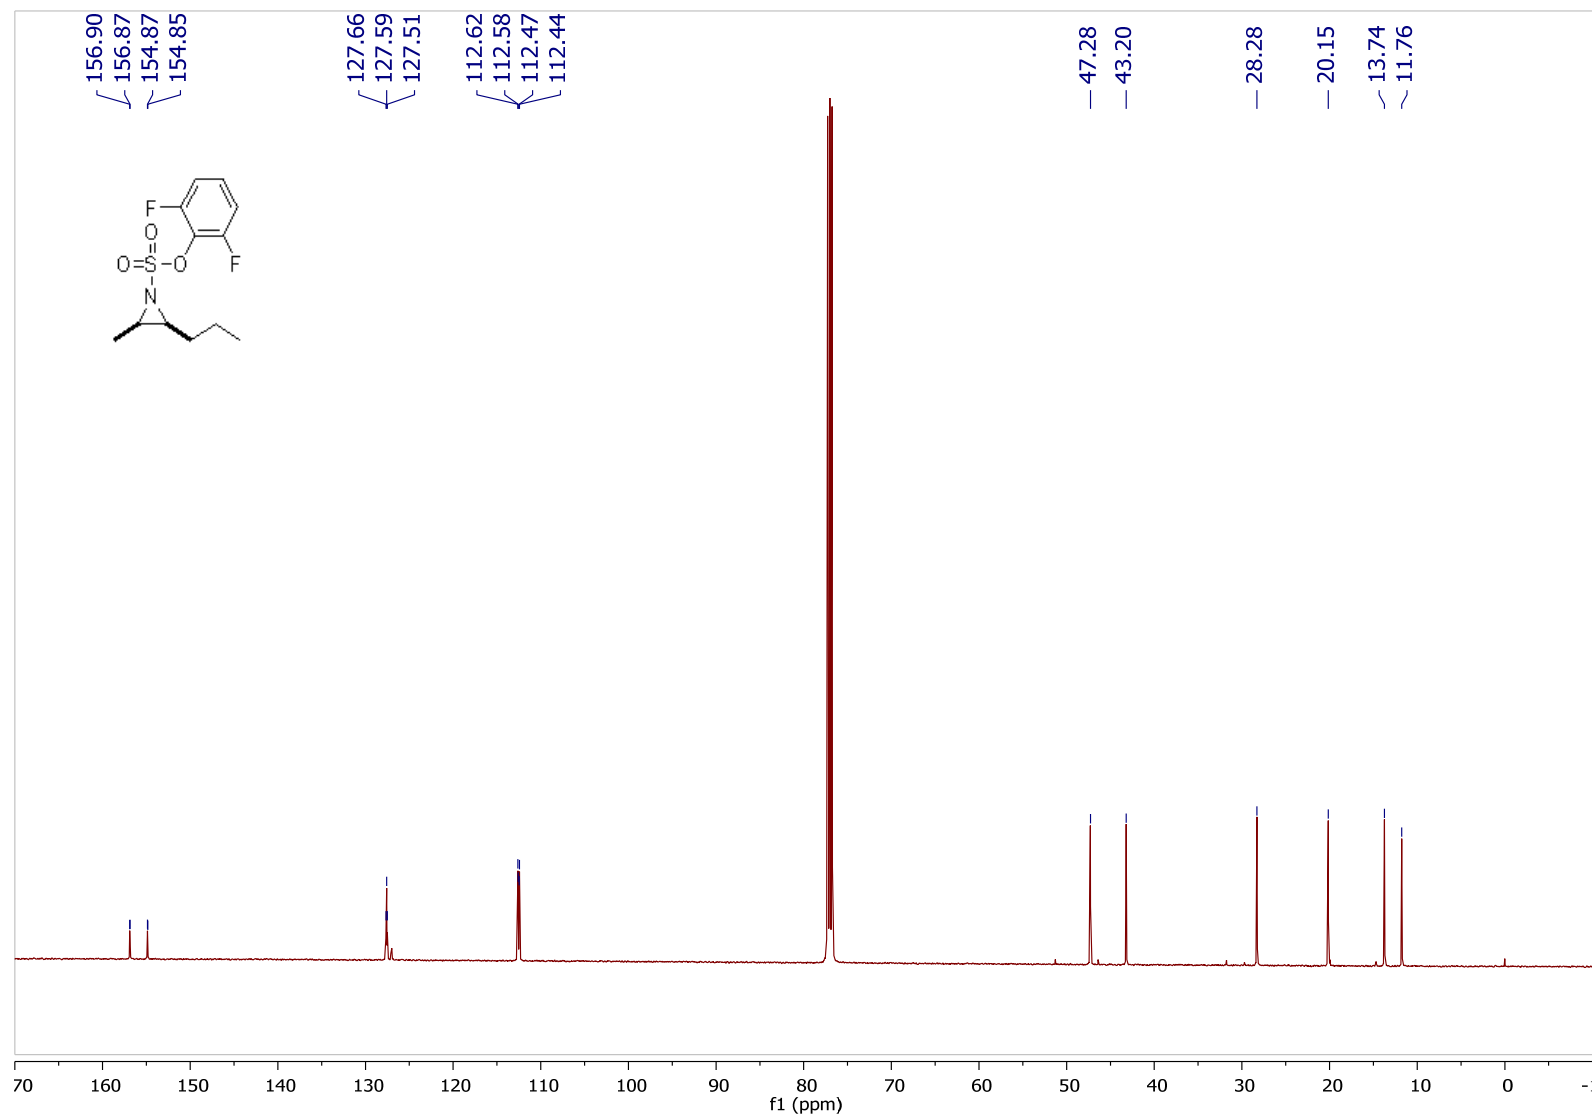

Compound *anti*-8a.

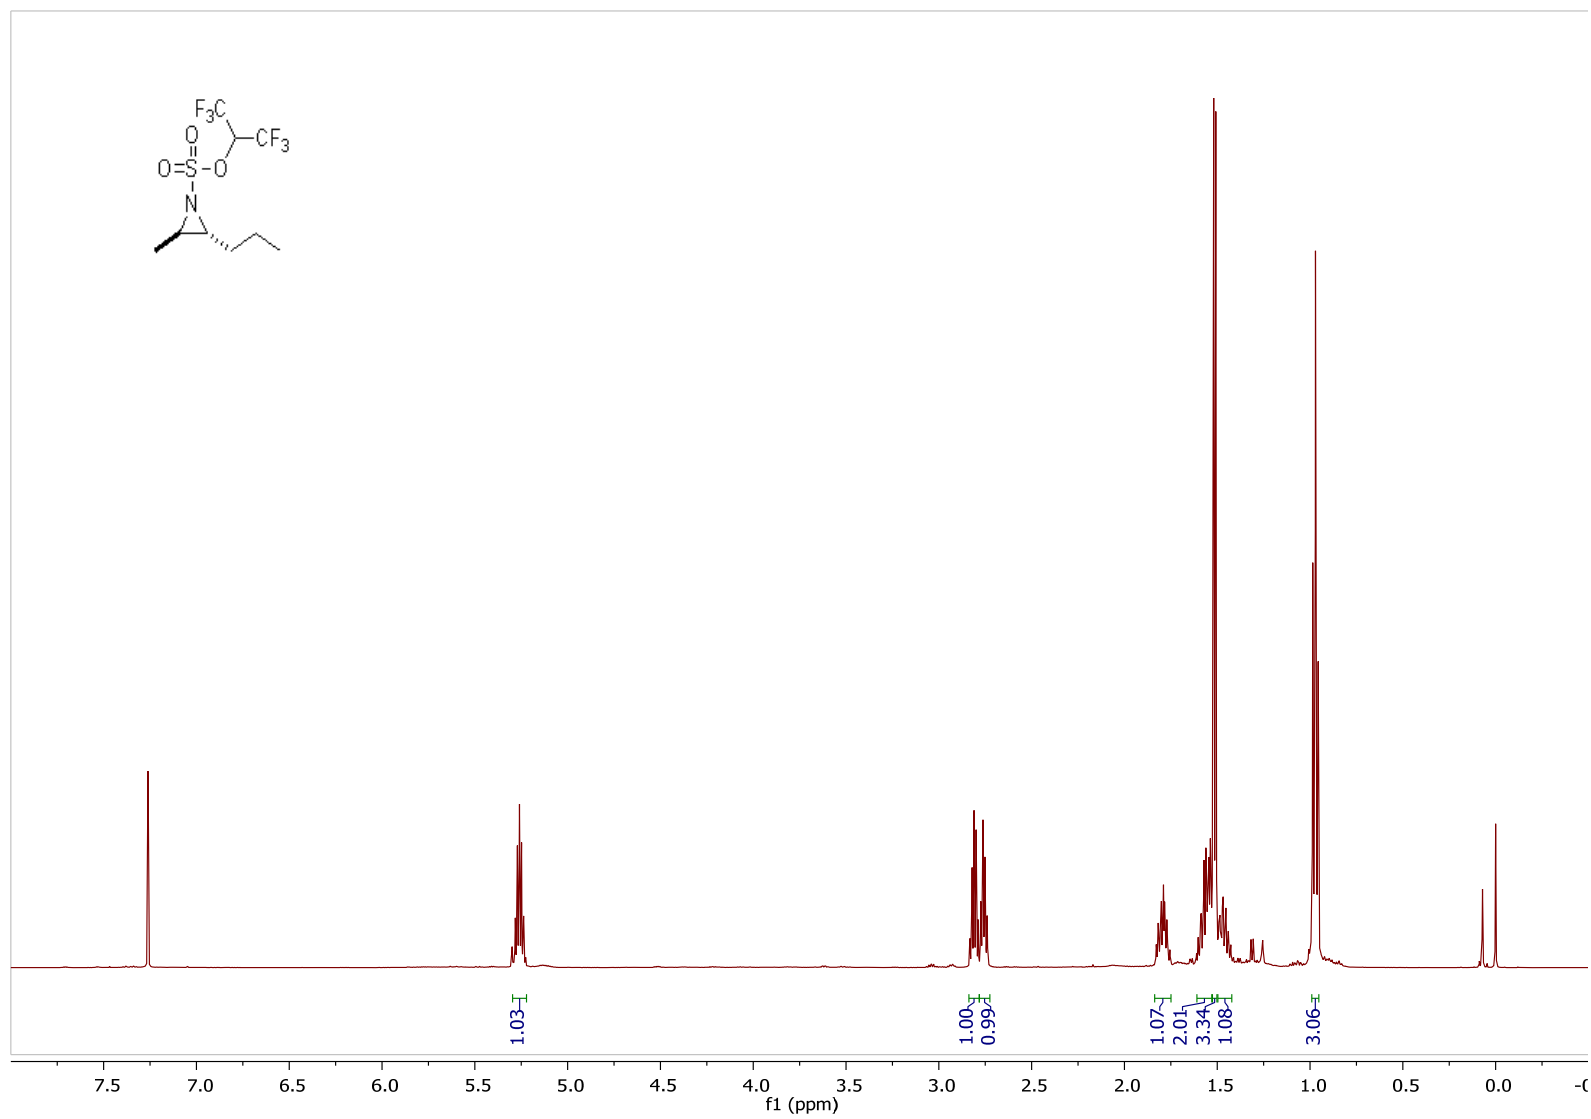



Compound *anti*-8a.

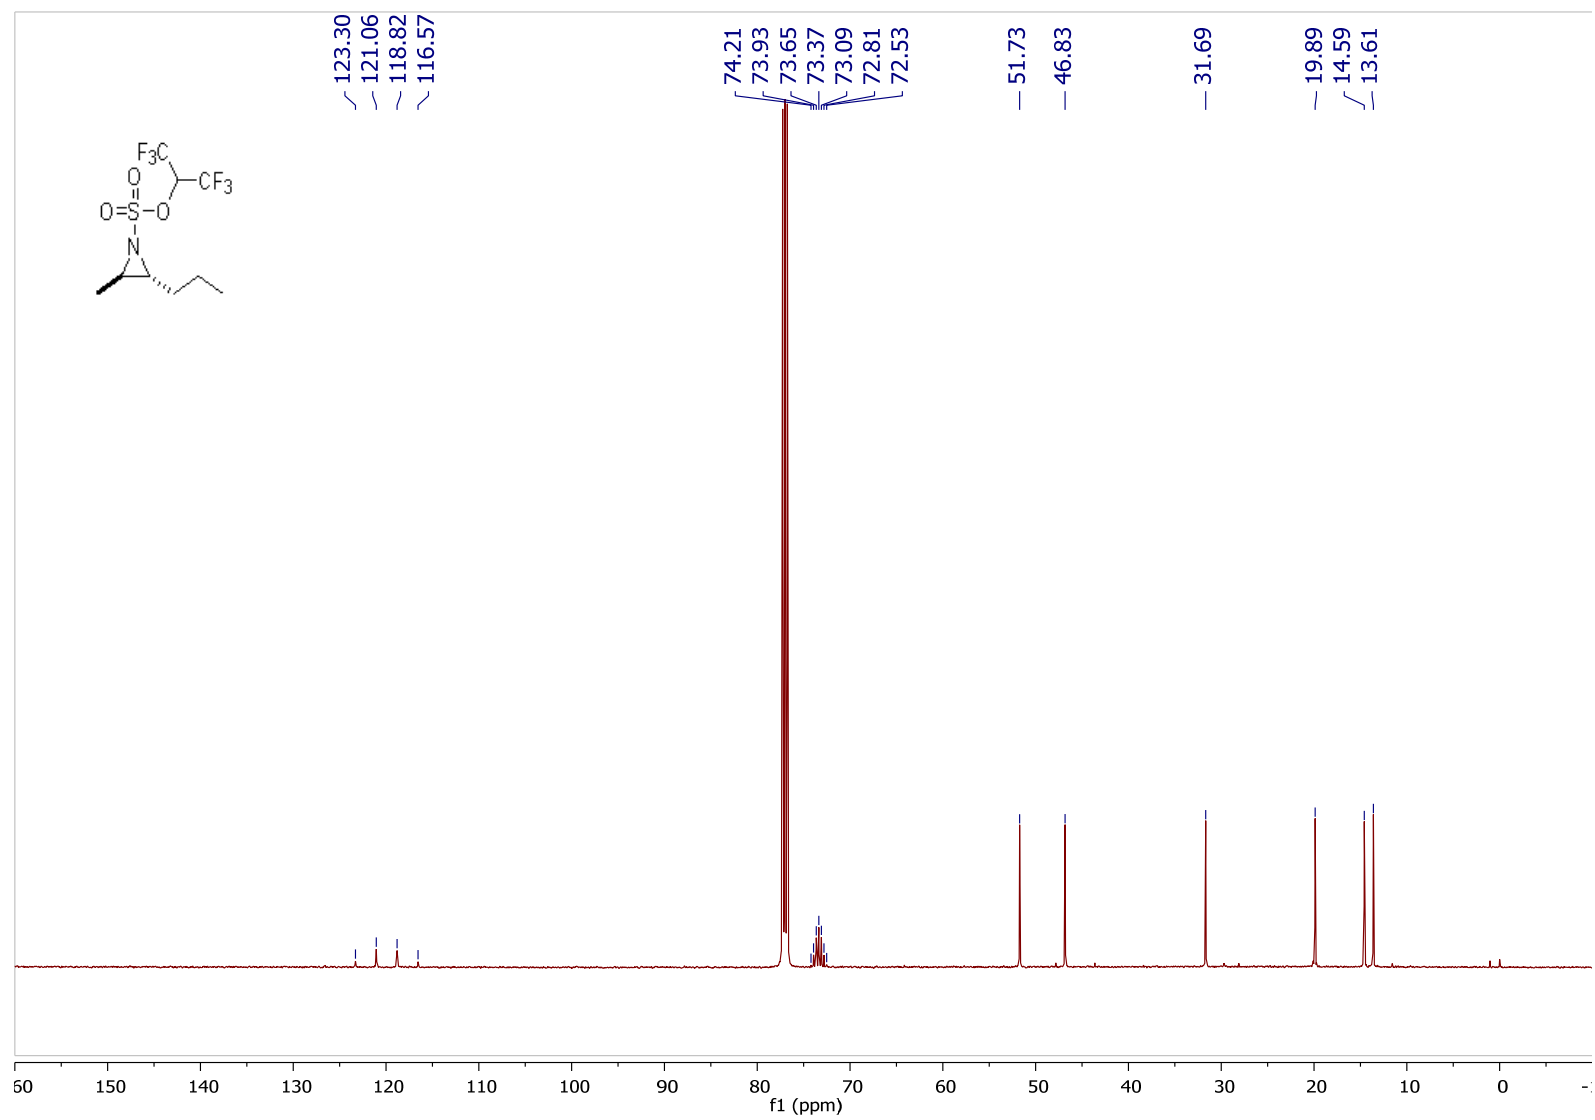

Compound *anti*-8b.

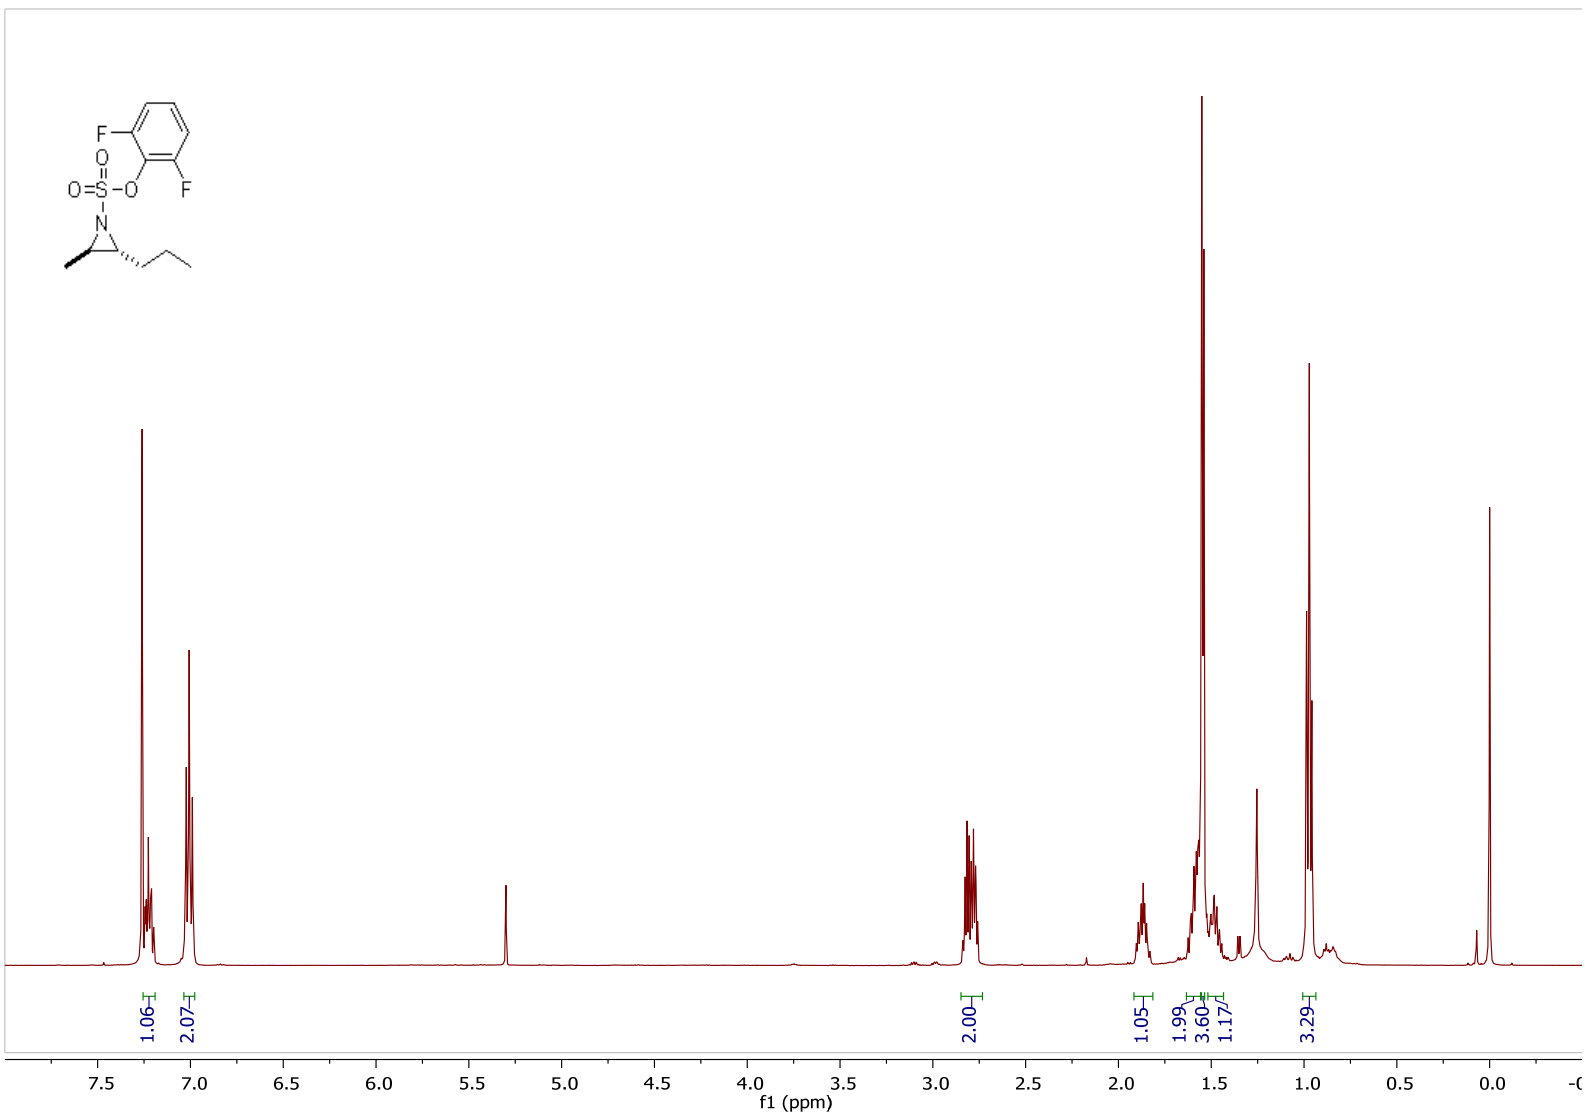

Compound *anti*-8b.

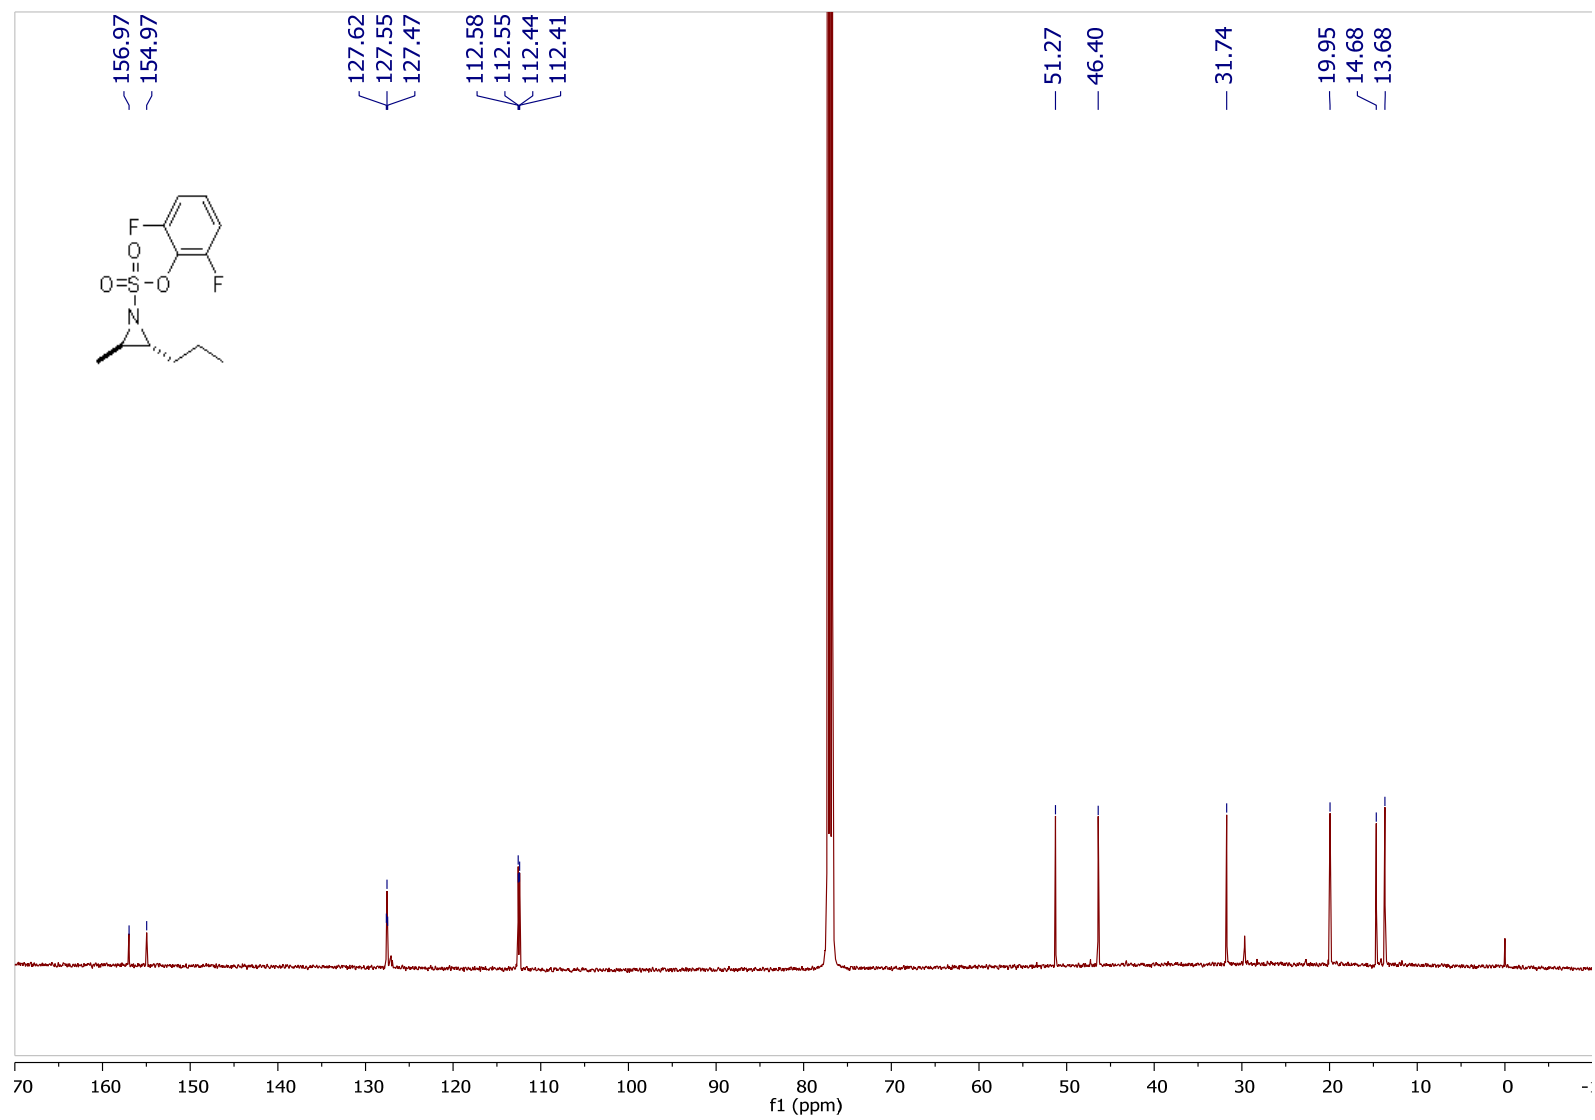

# Compound 8d and 8e

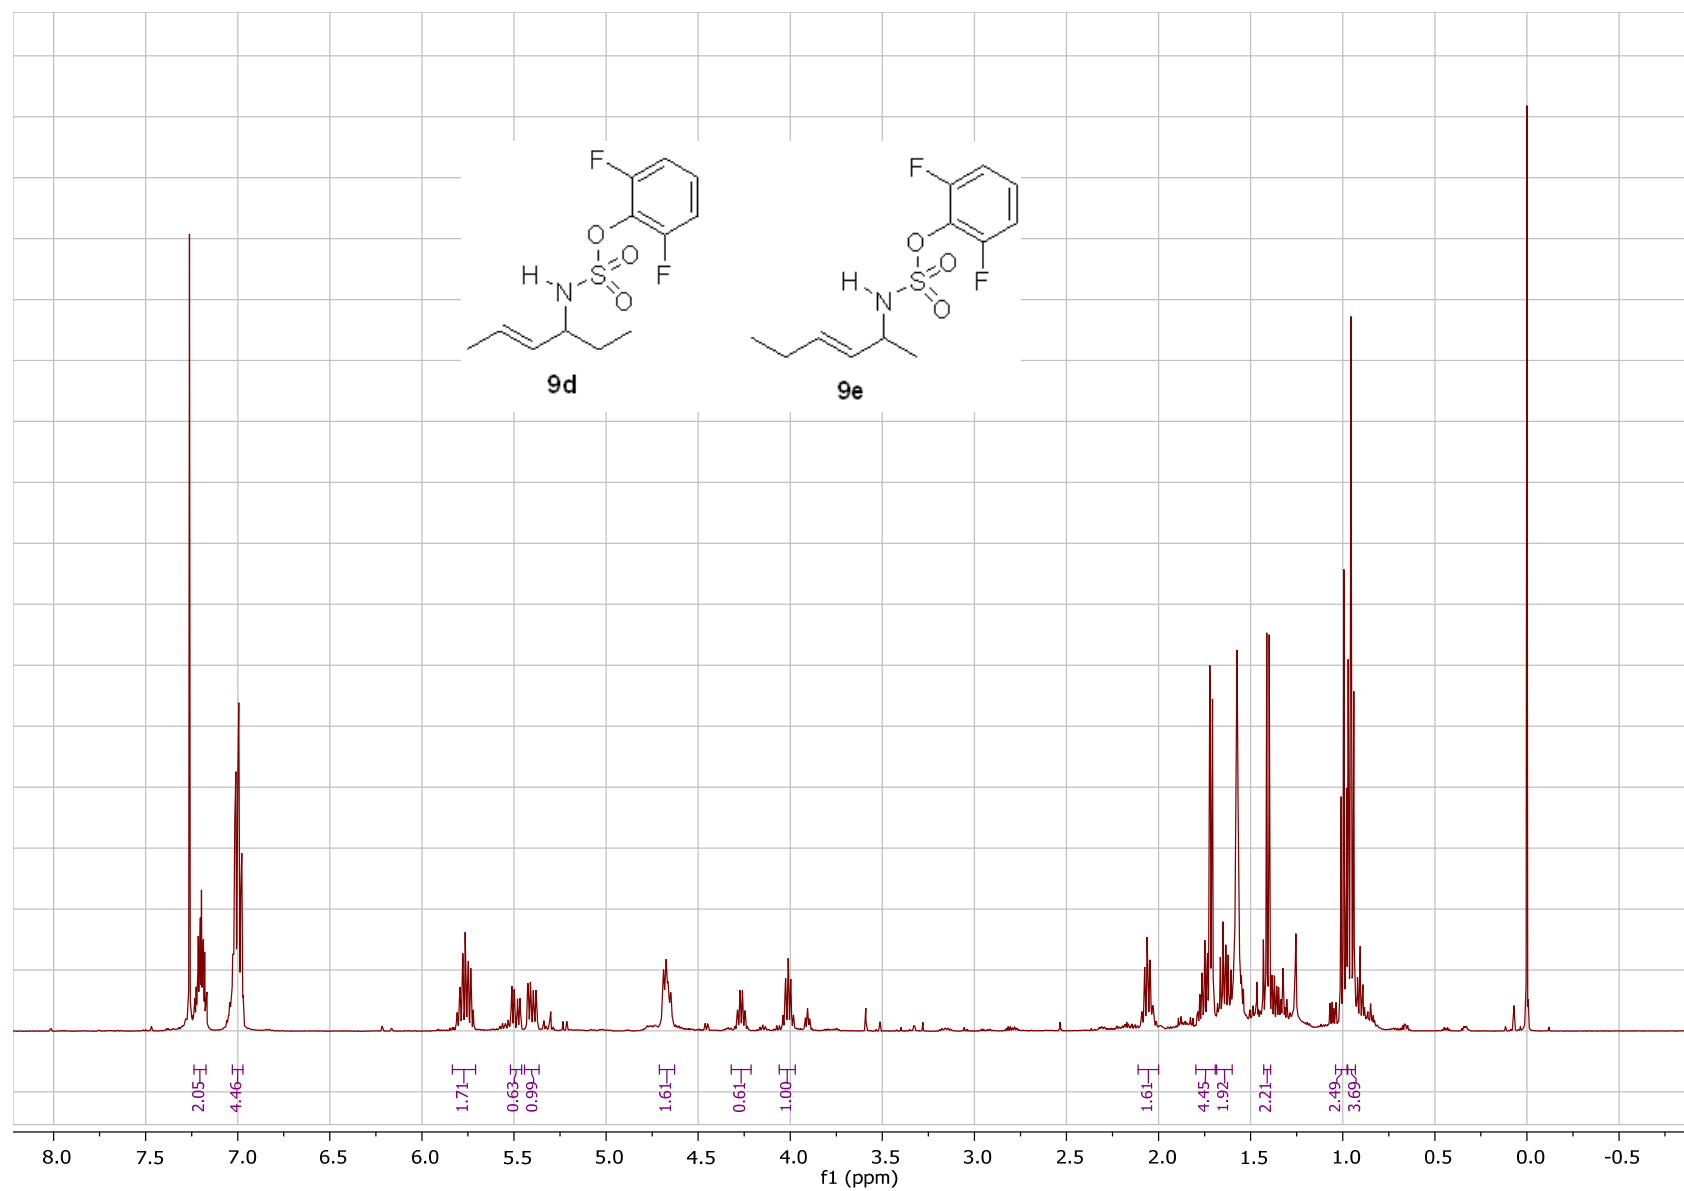

# Compound 8d and 8e

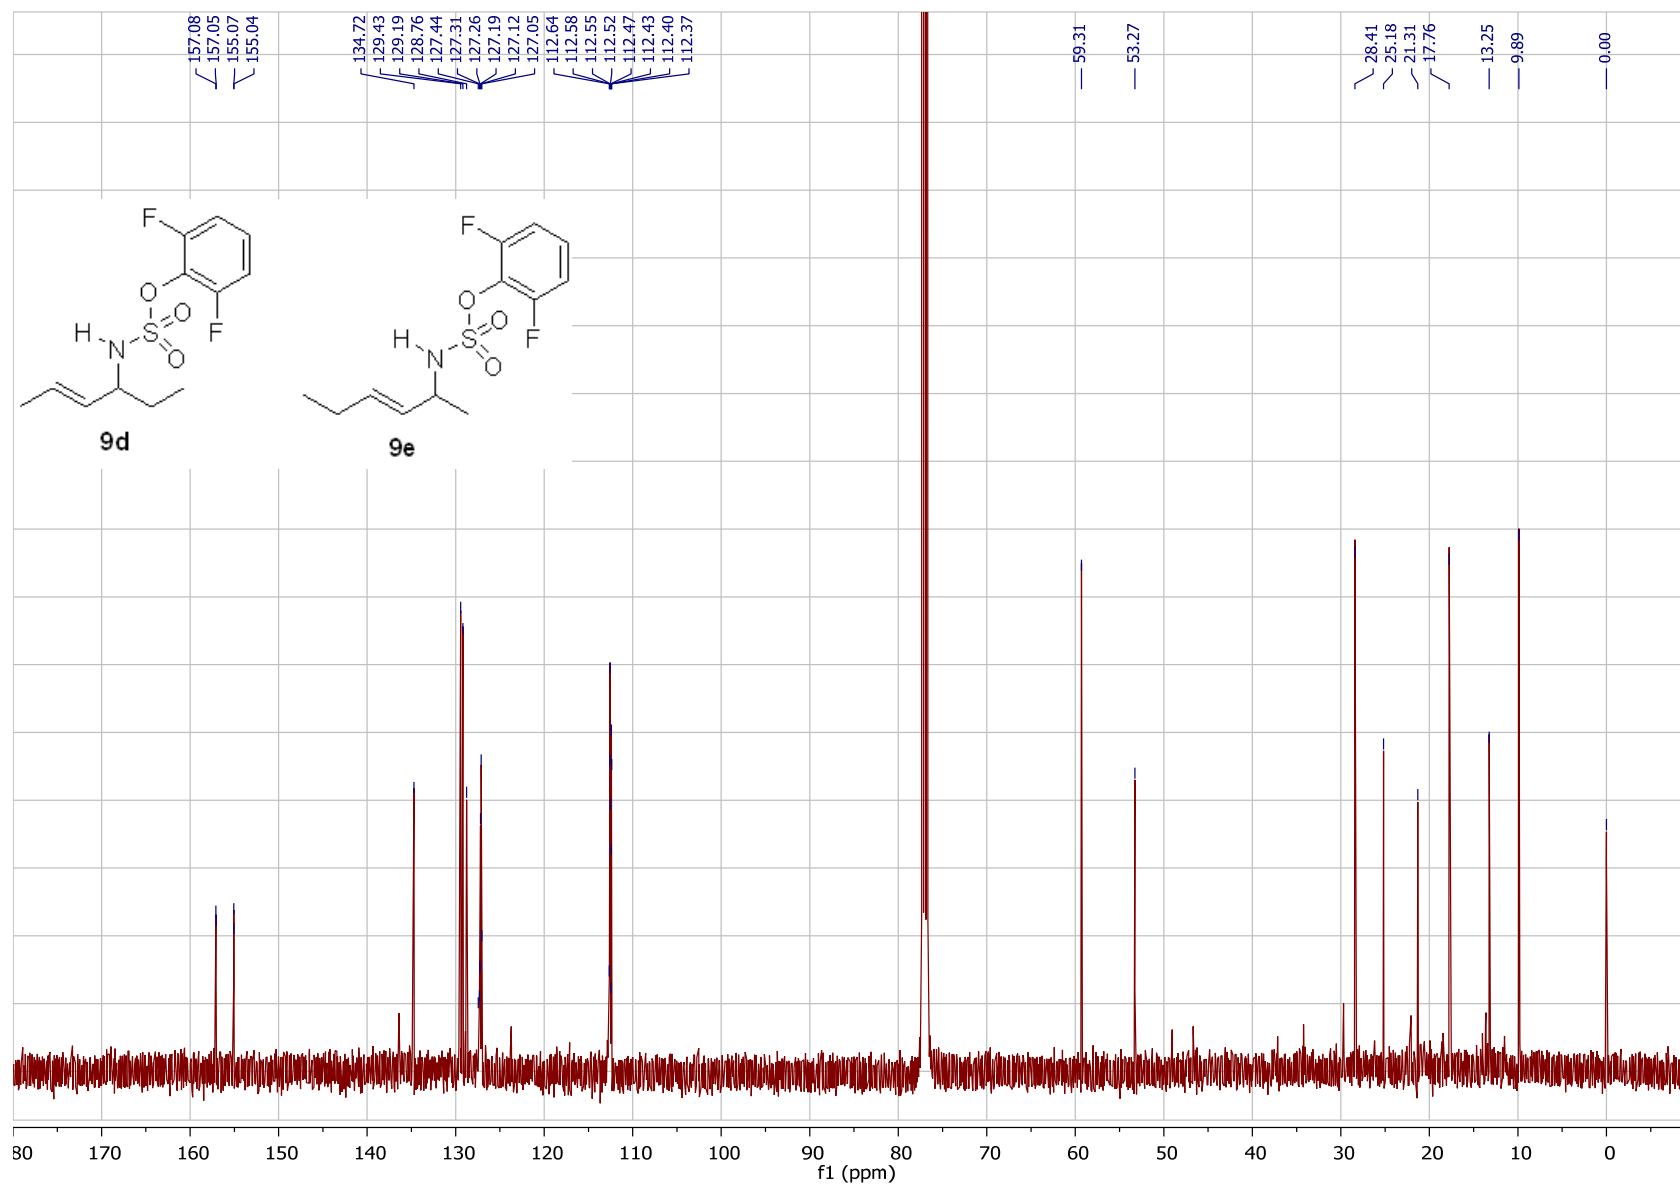

# Compound 8d and 8e-HSQC

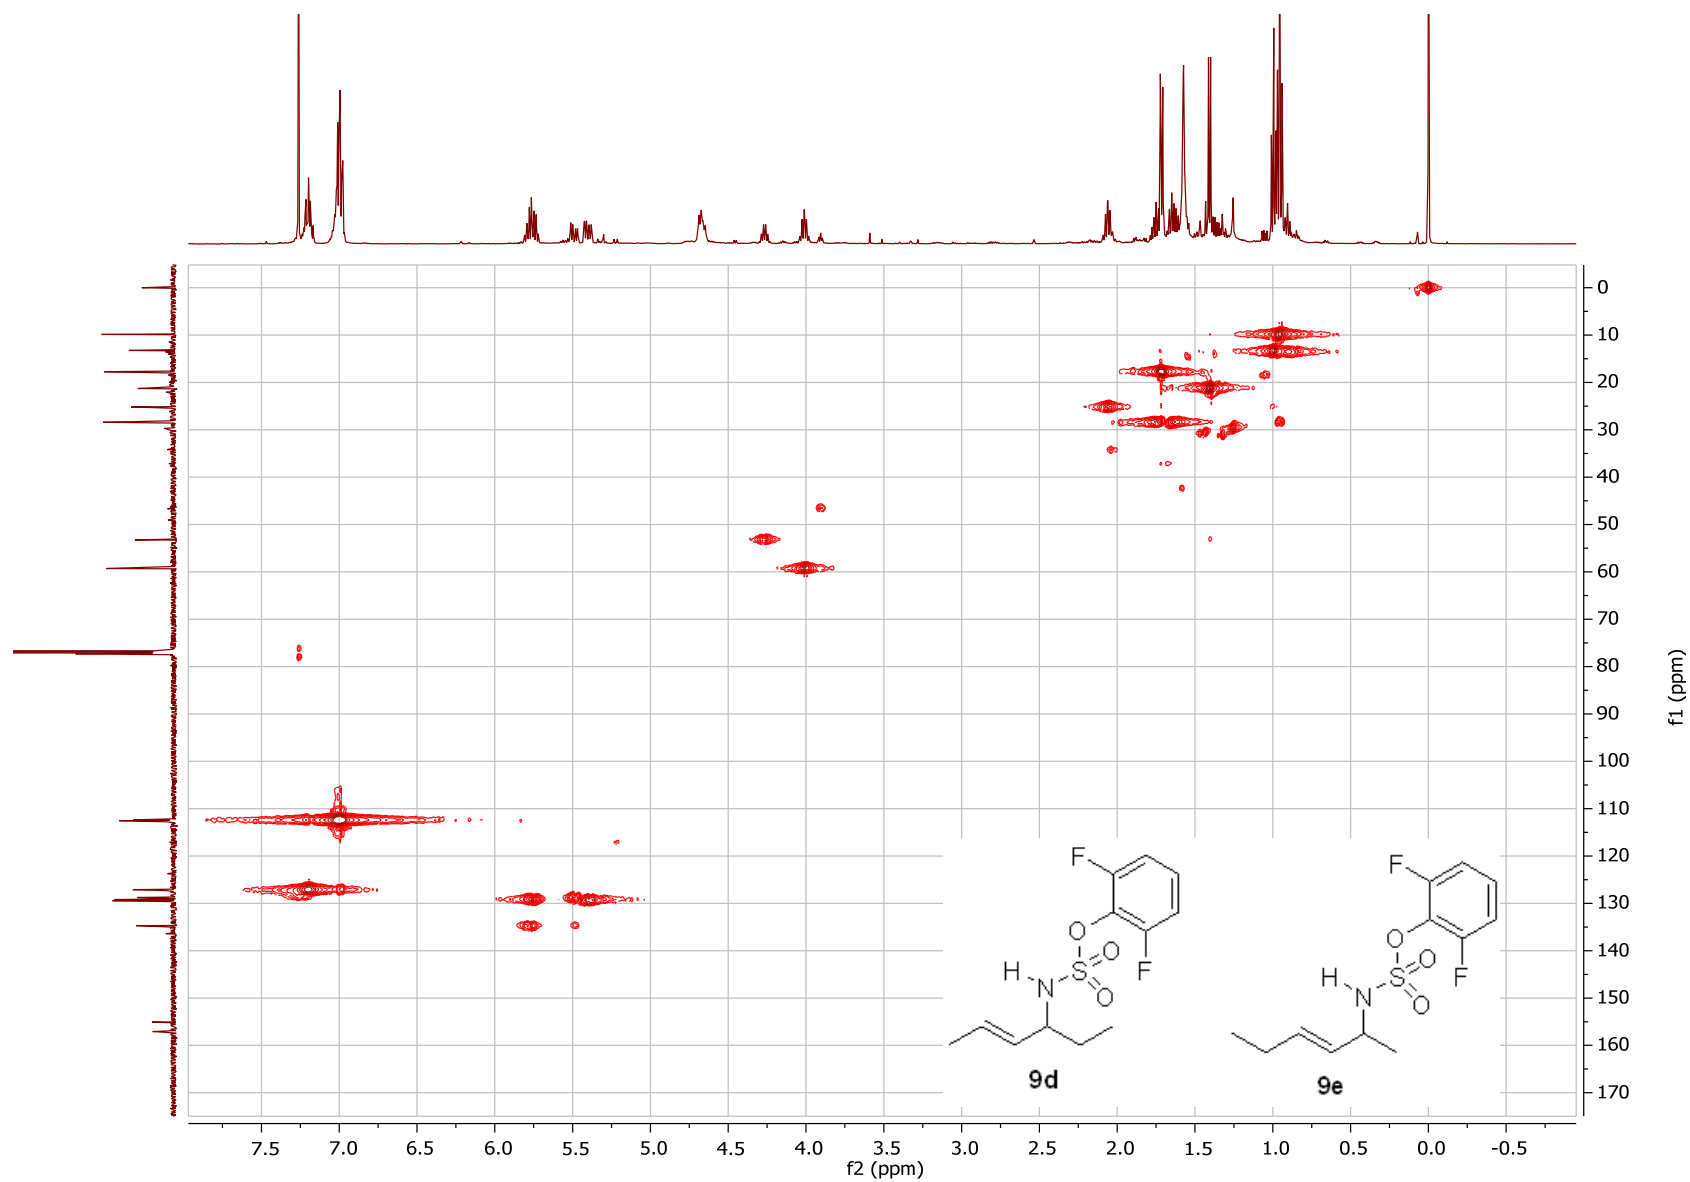

**Compound 9a.**

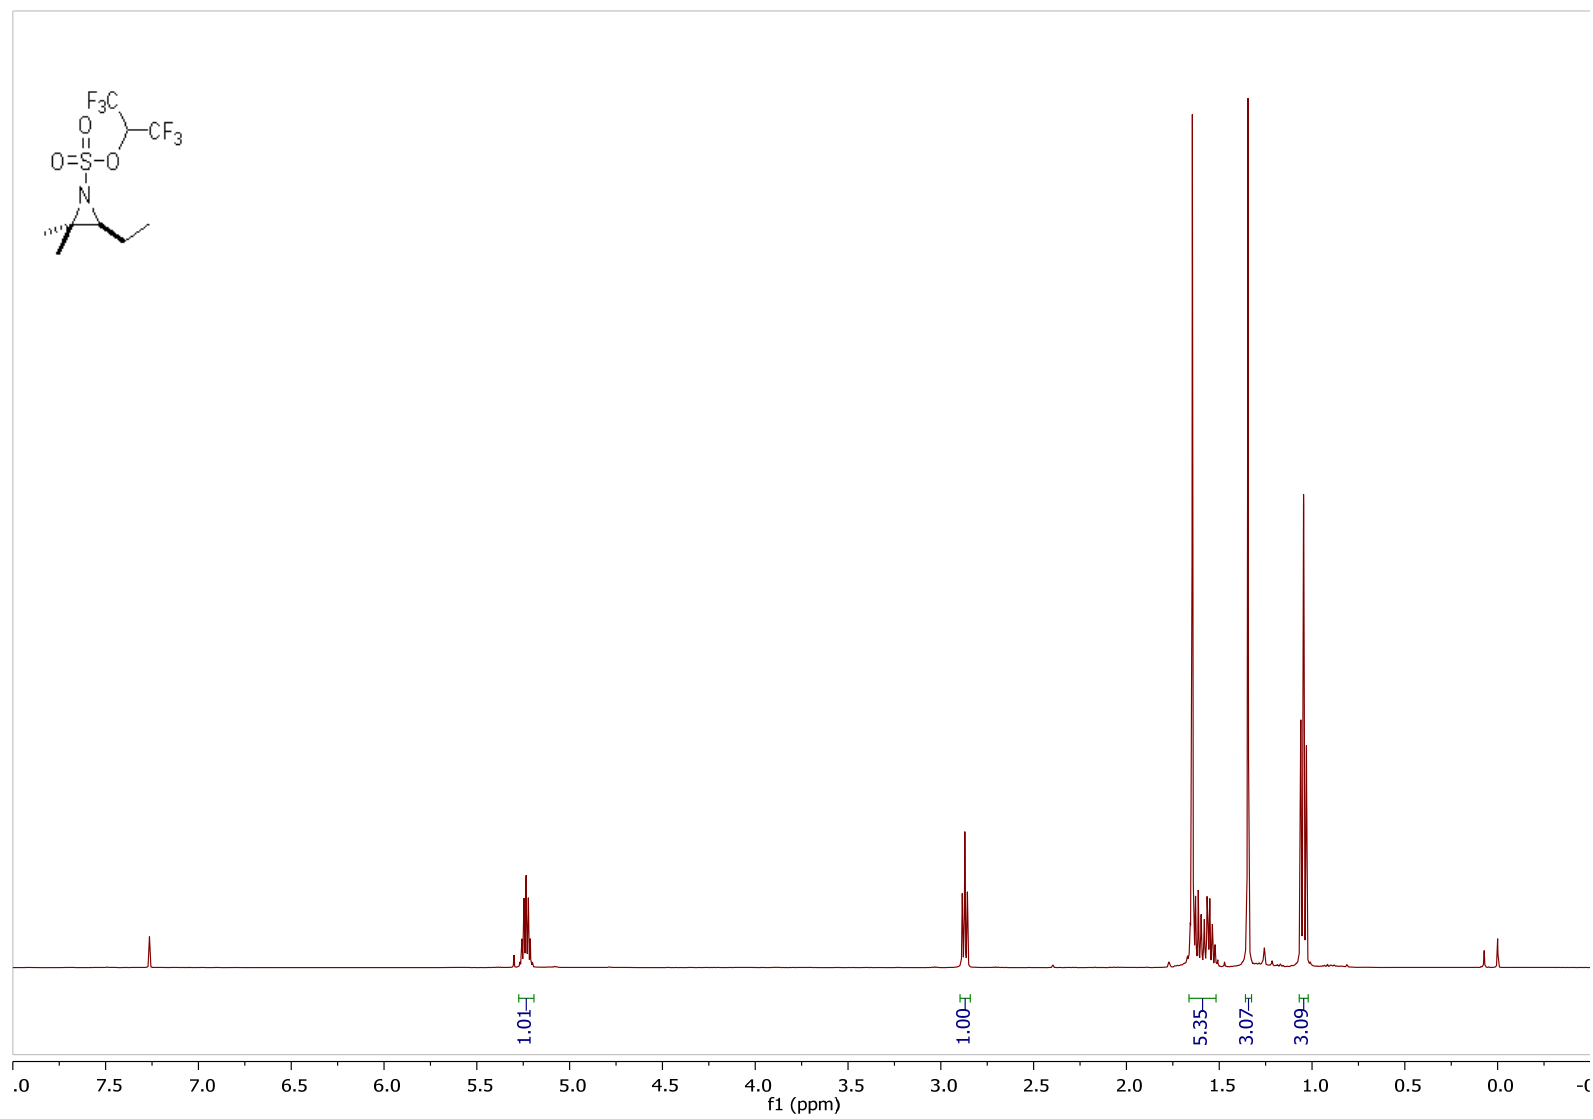

**Compound 9a.**

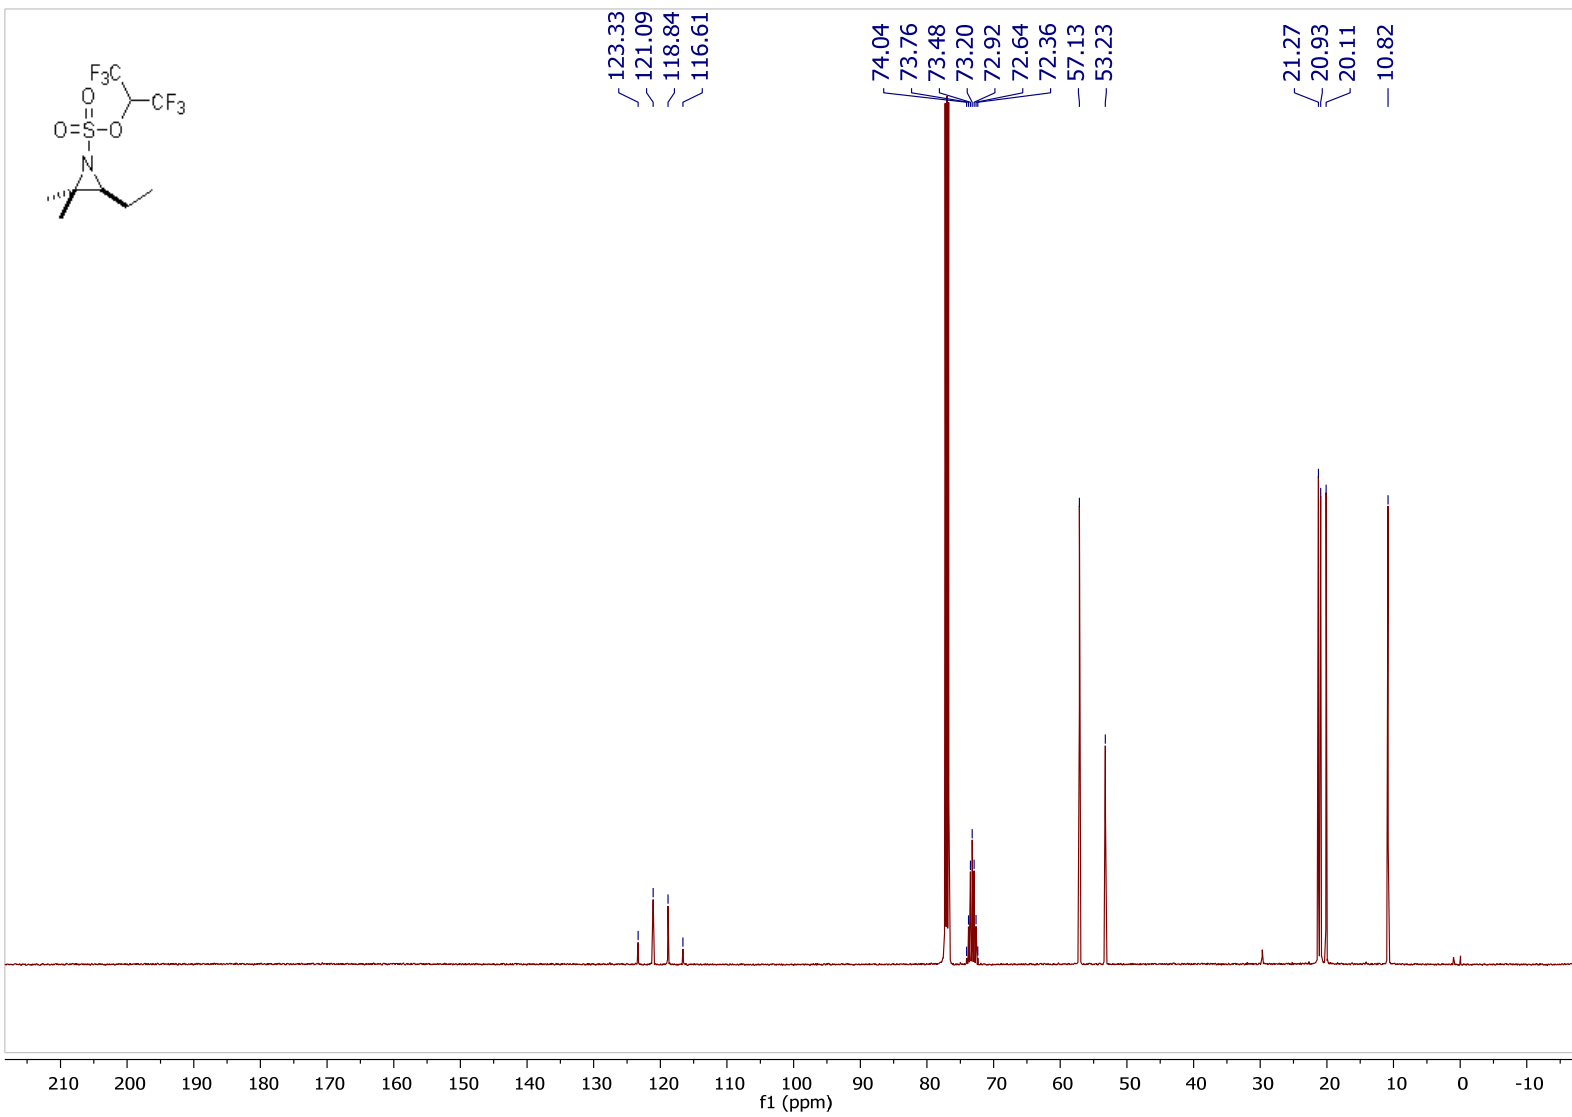



**Compound 9b.**

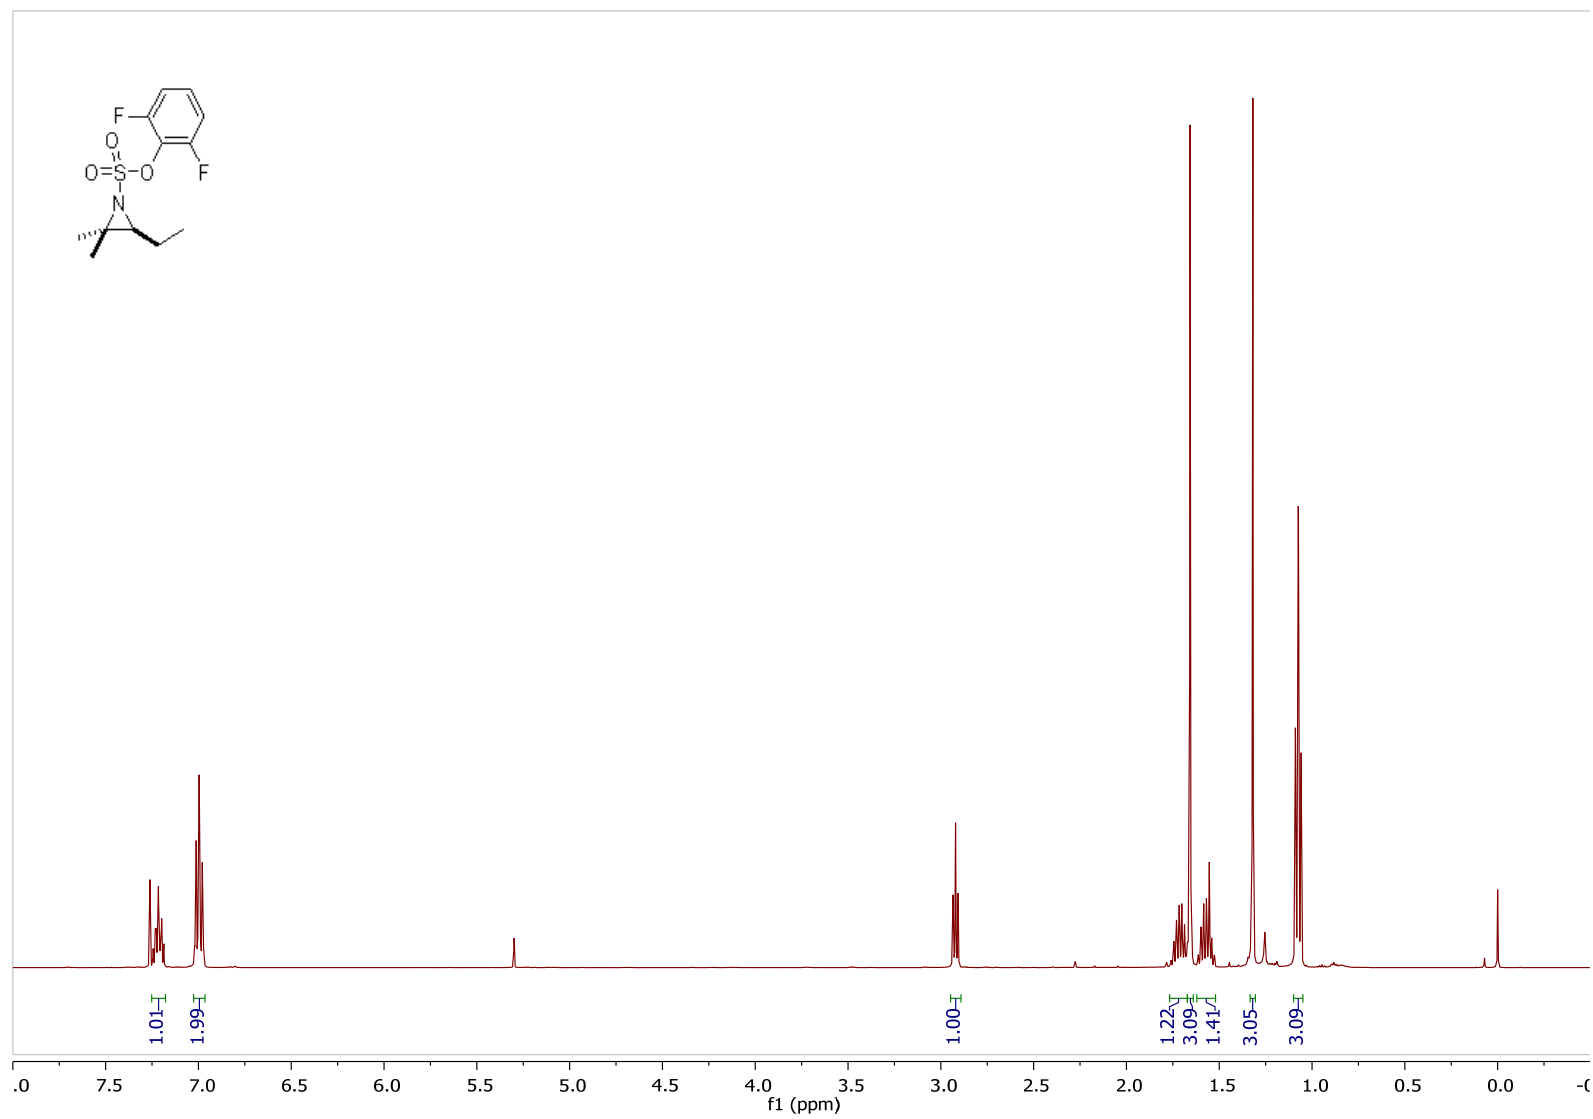

Compound 9b.

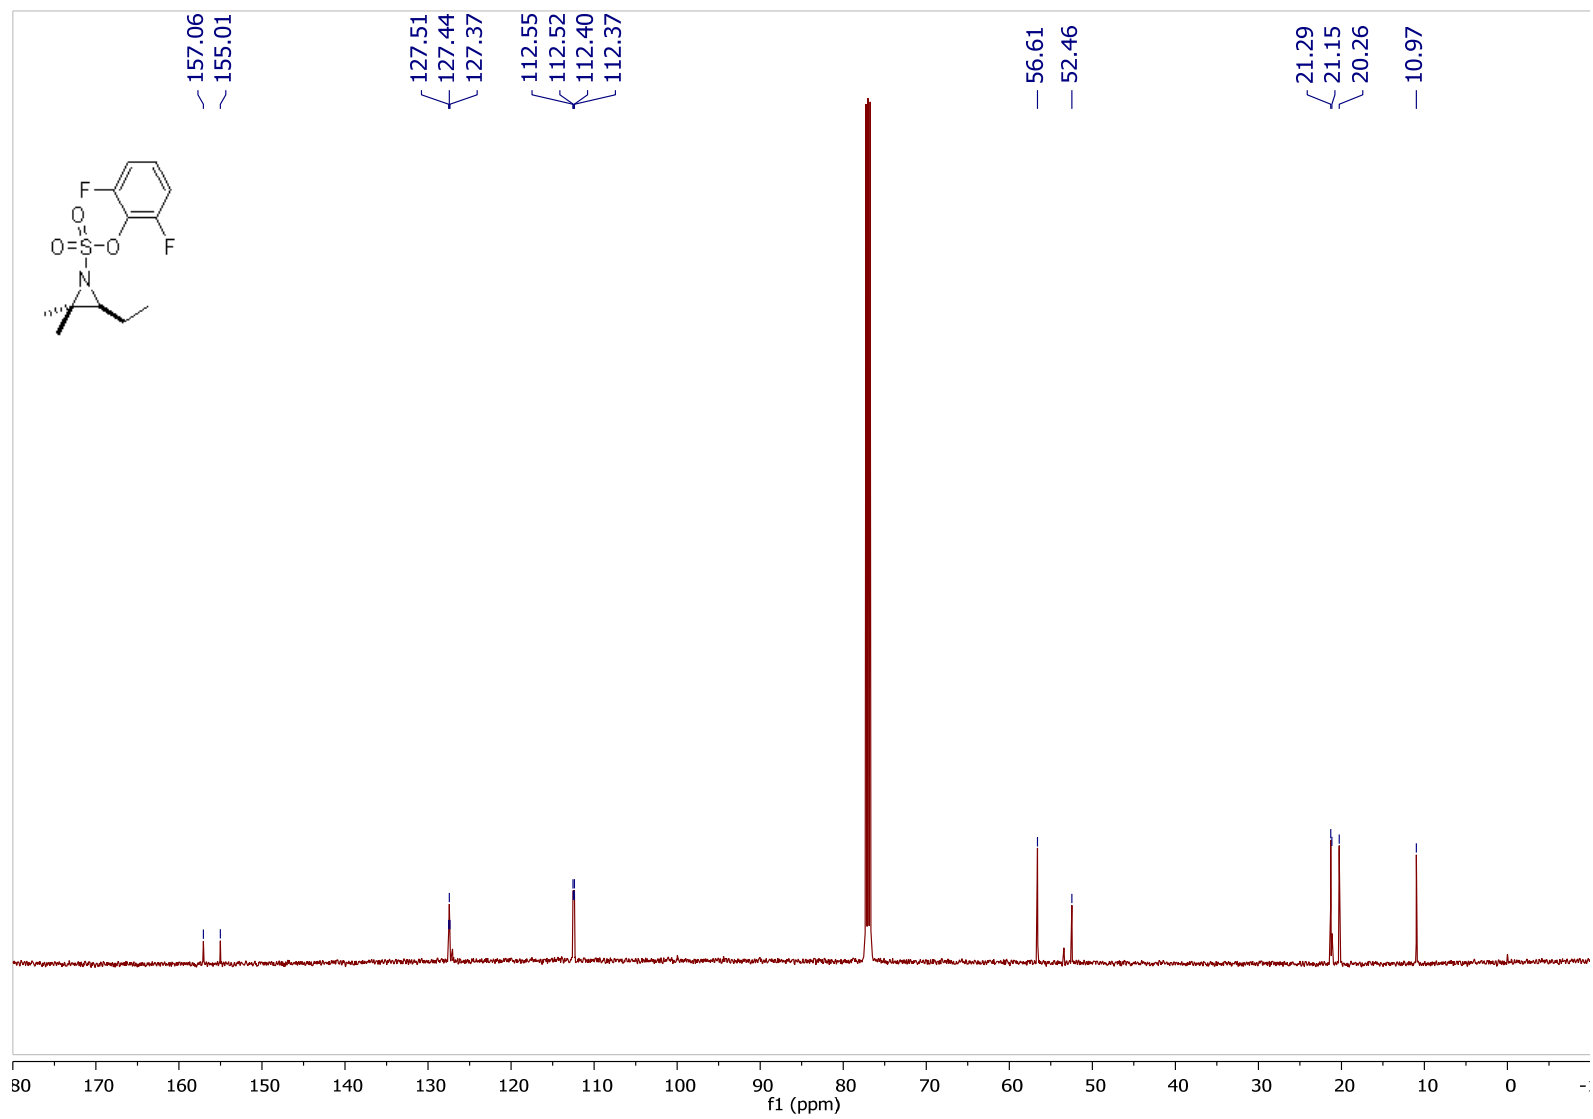

**Compound 10a.**

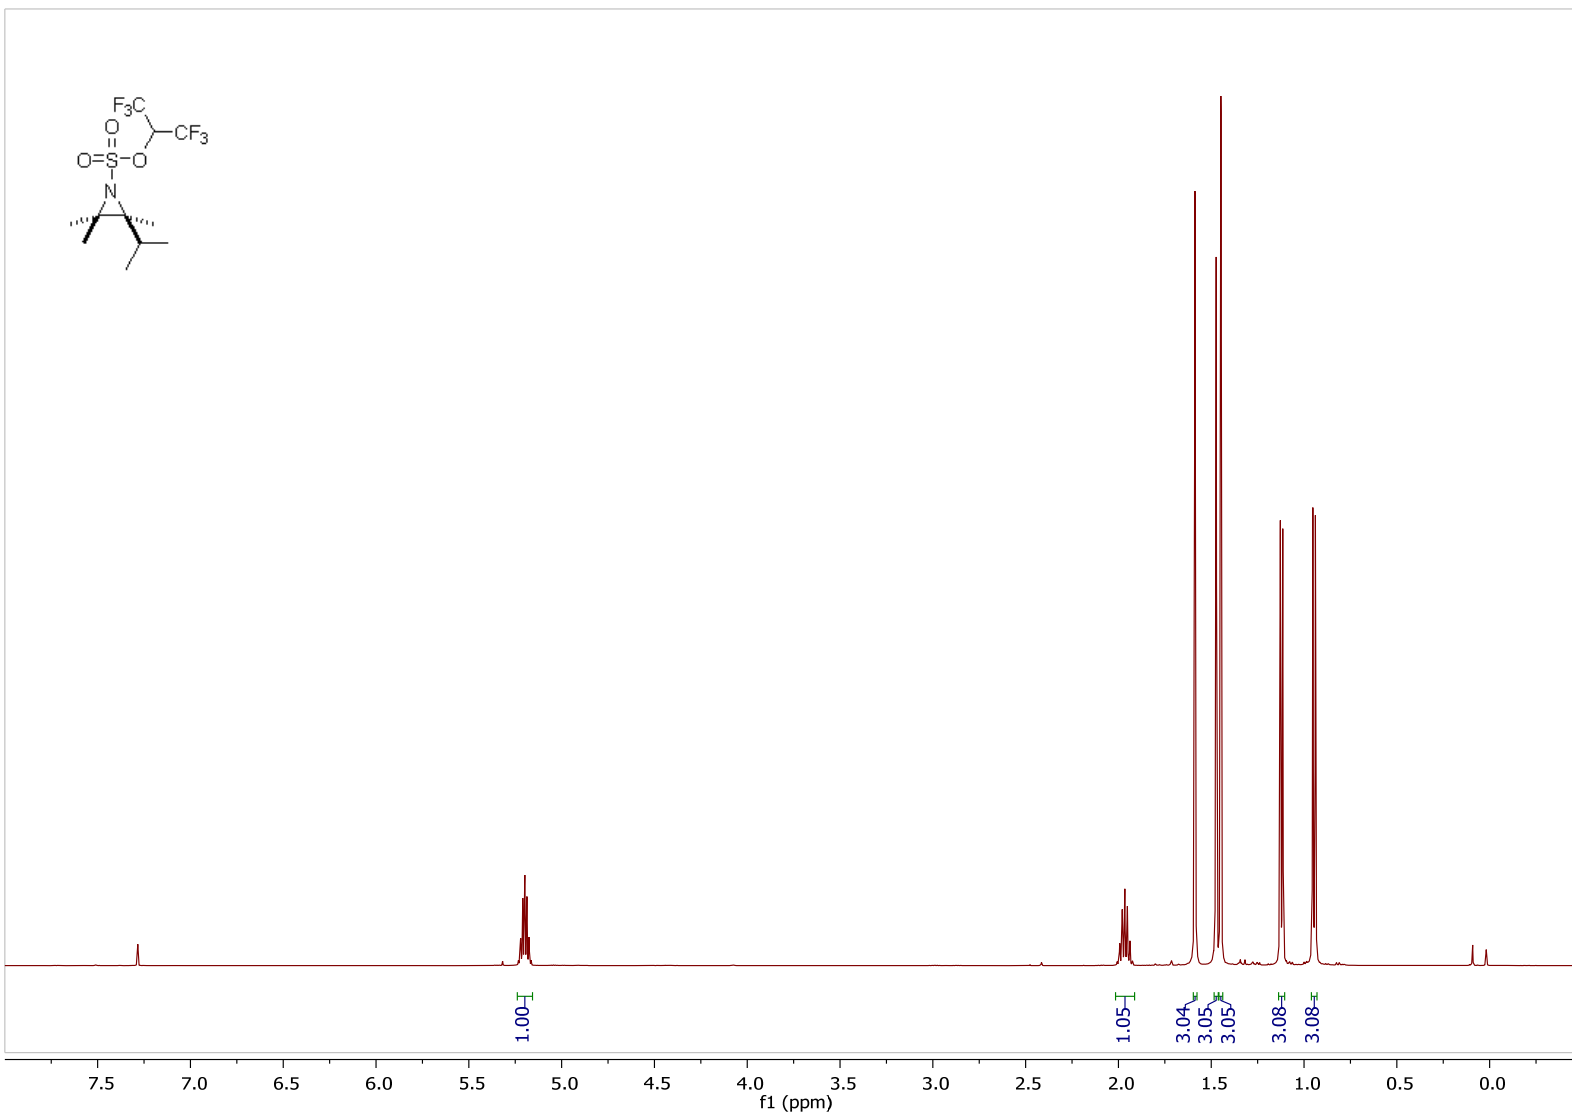

# Compound 10a.

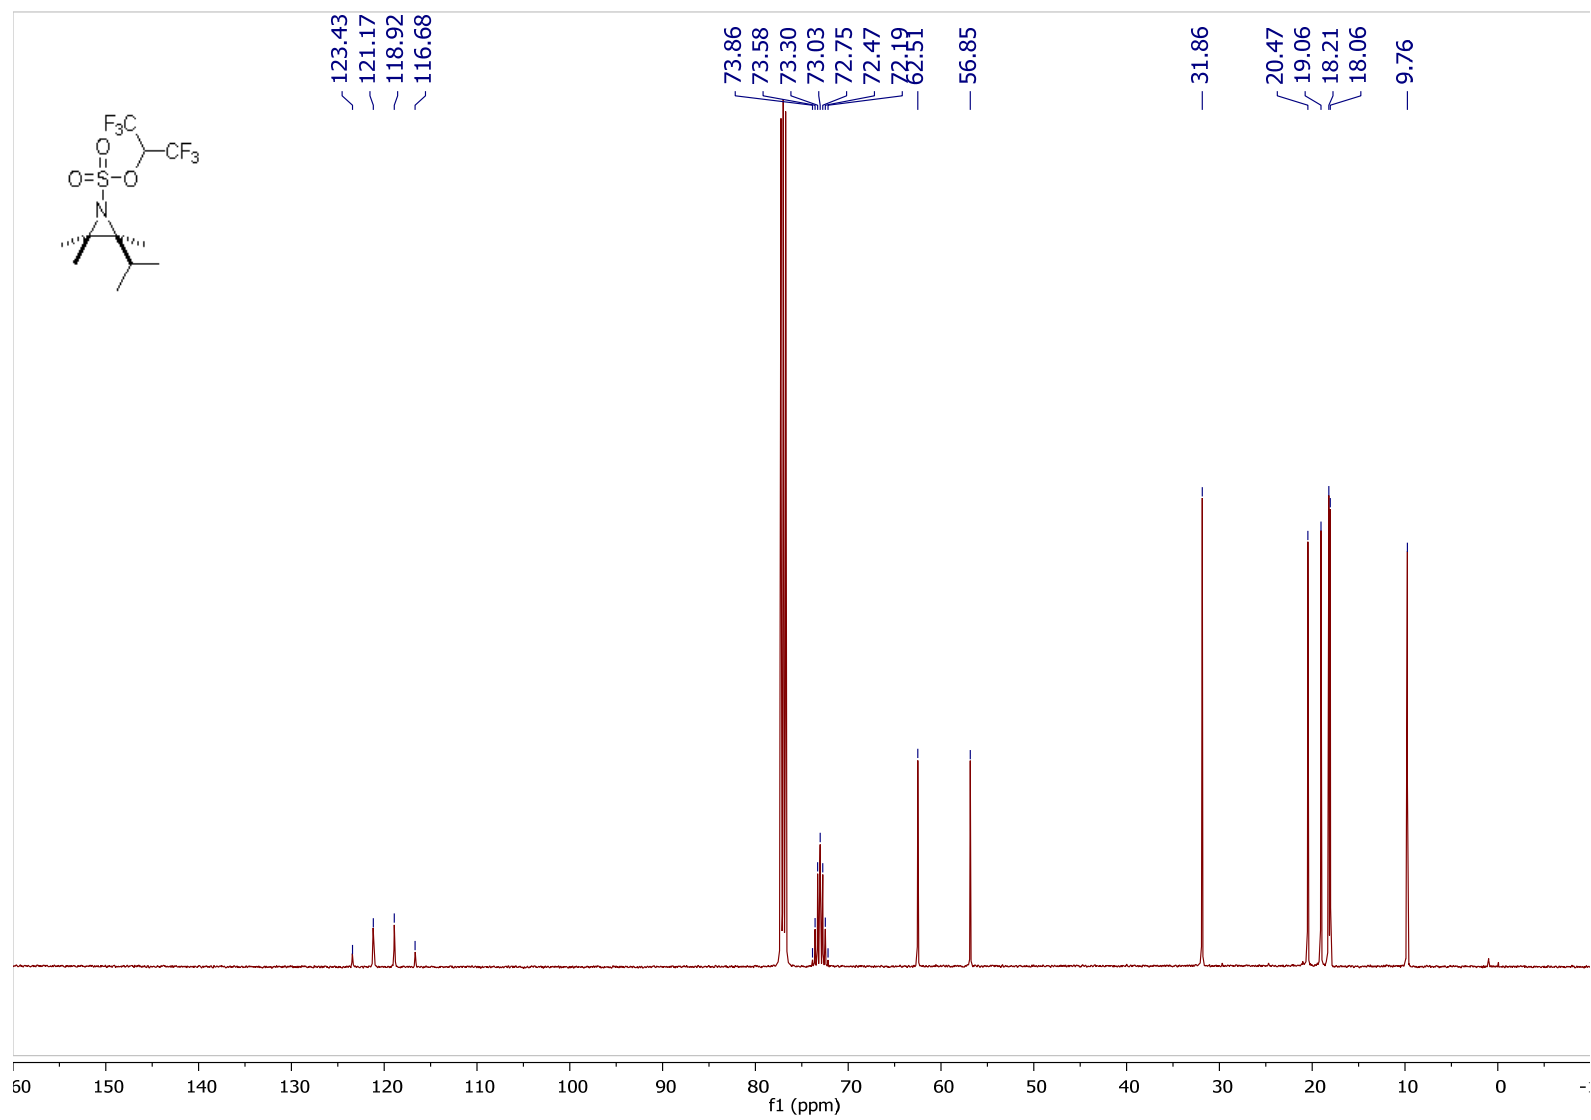

**Compound 10b.**

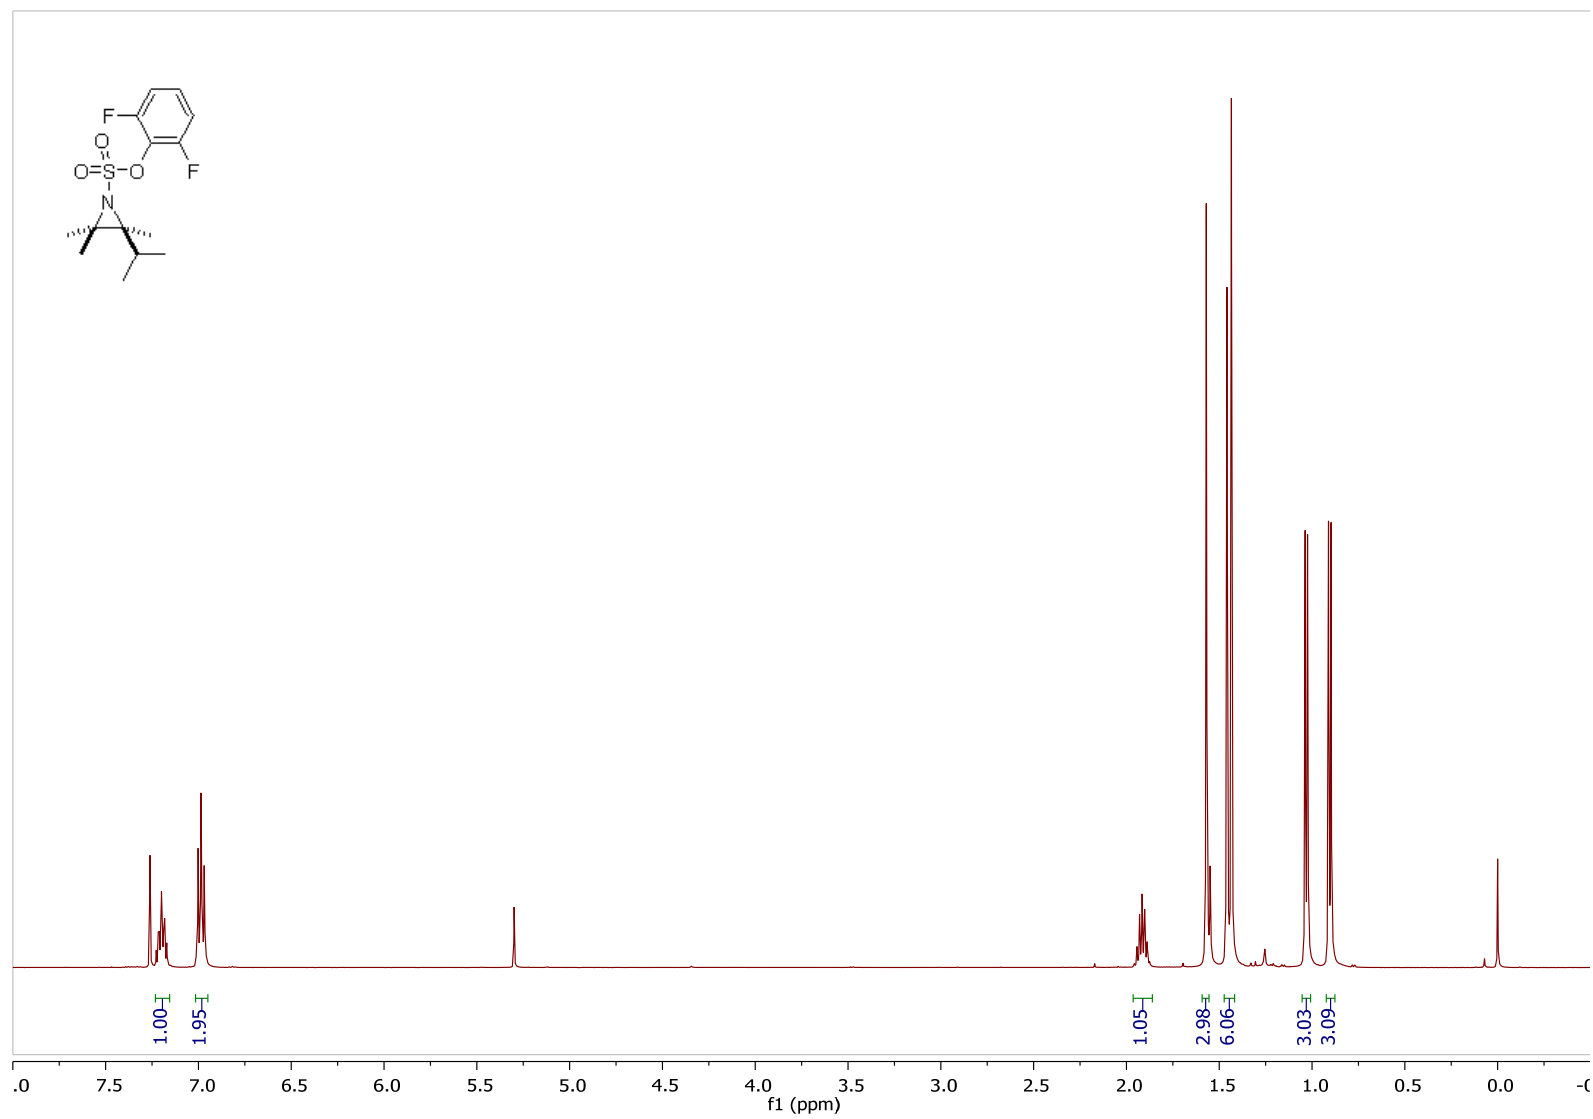

Compound 10b.

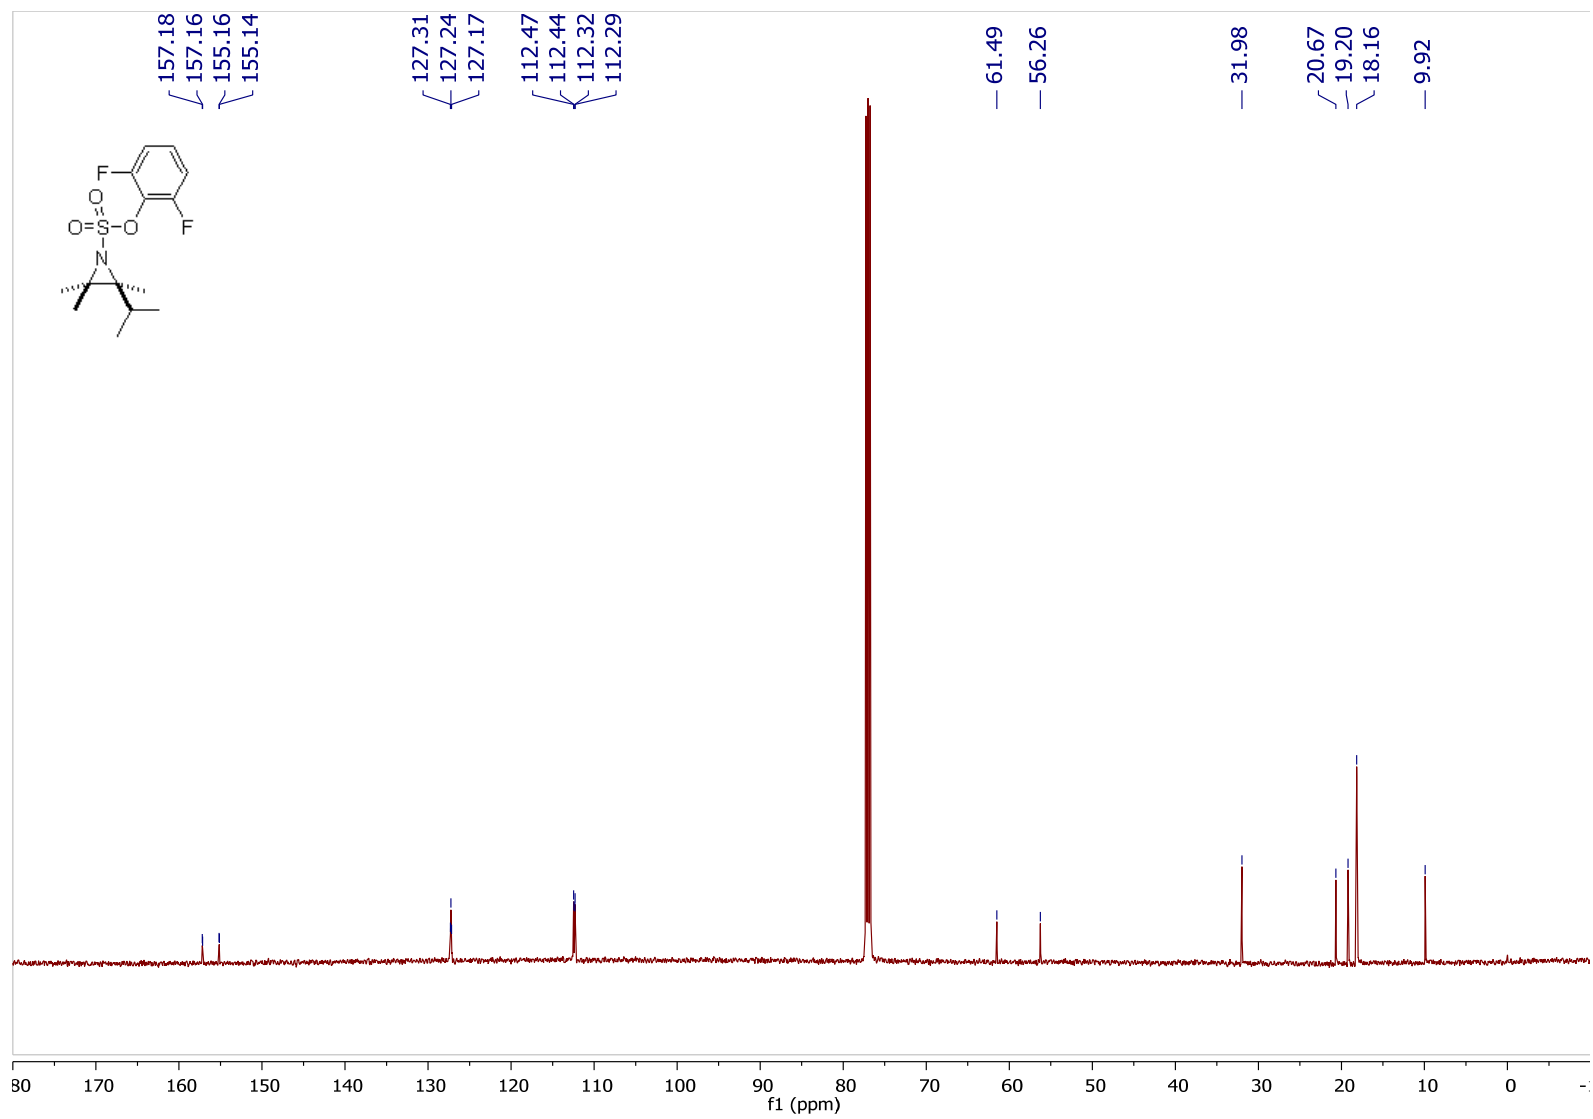

**Compound 11a.**

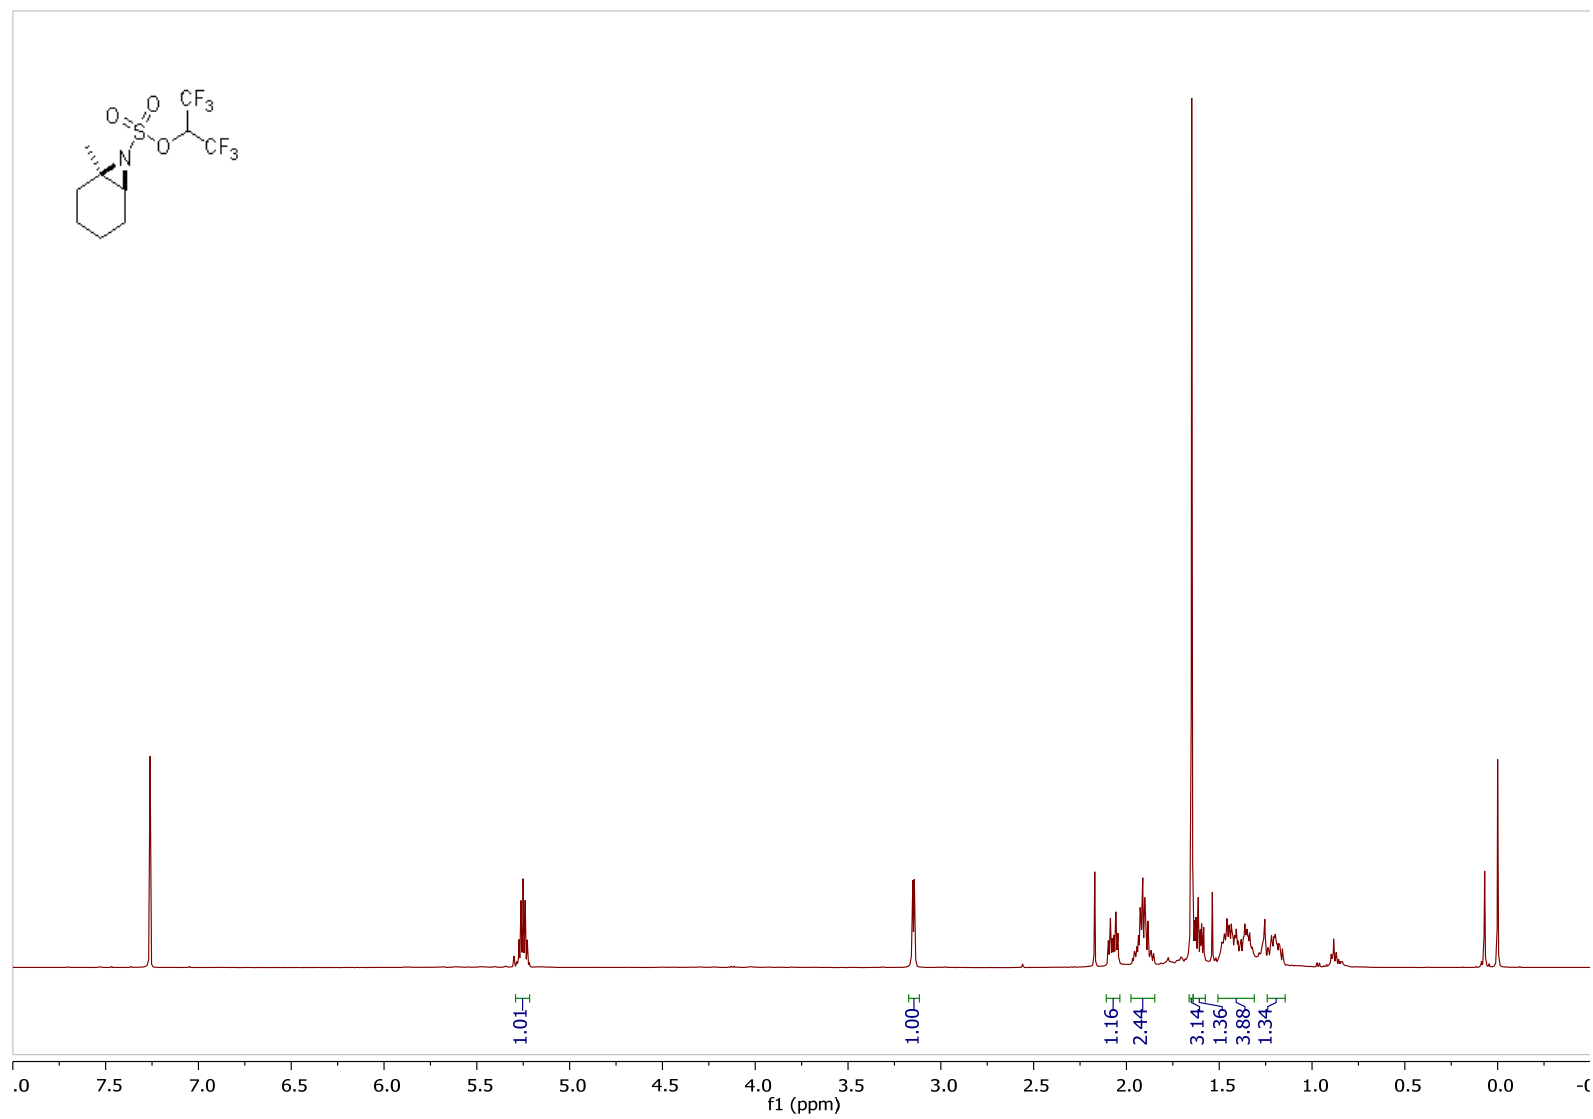

# Compound 11a.

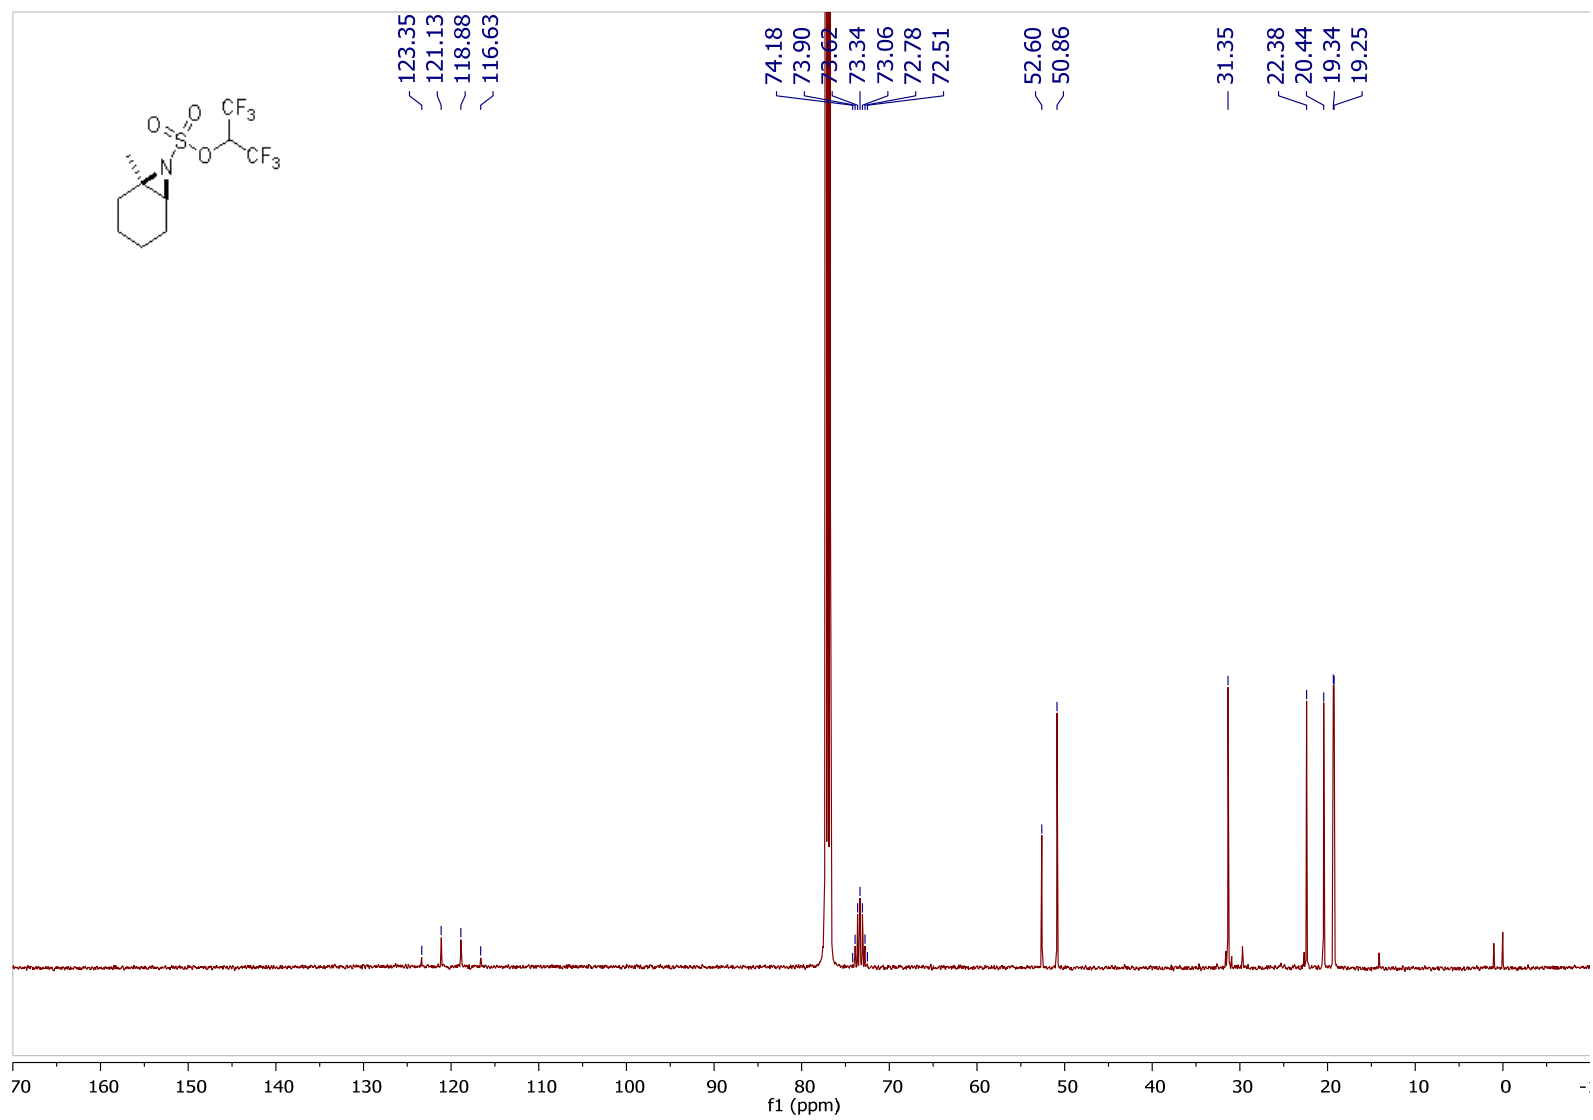



**Compound 11b.**

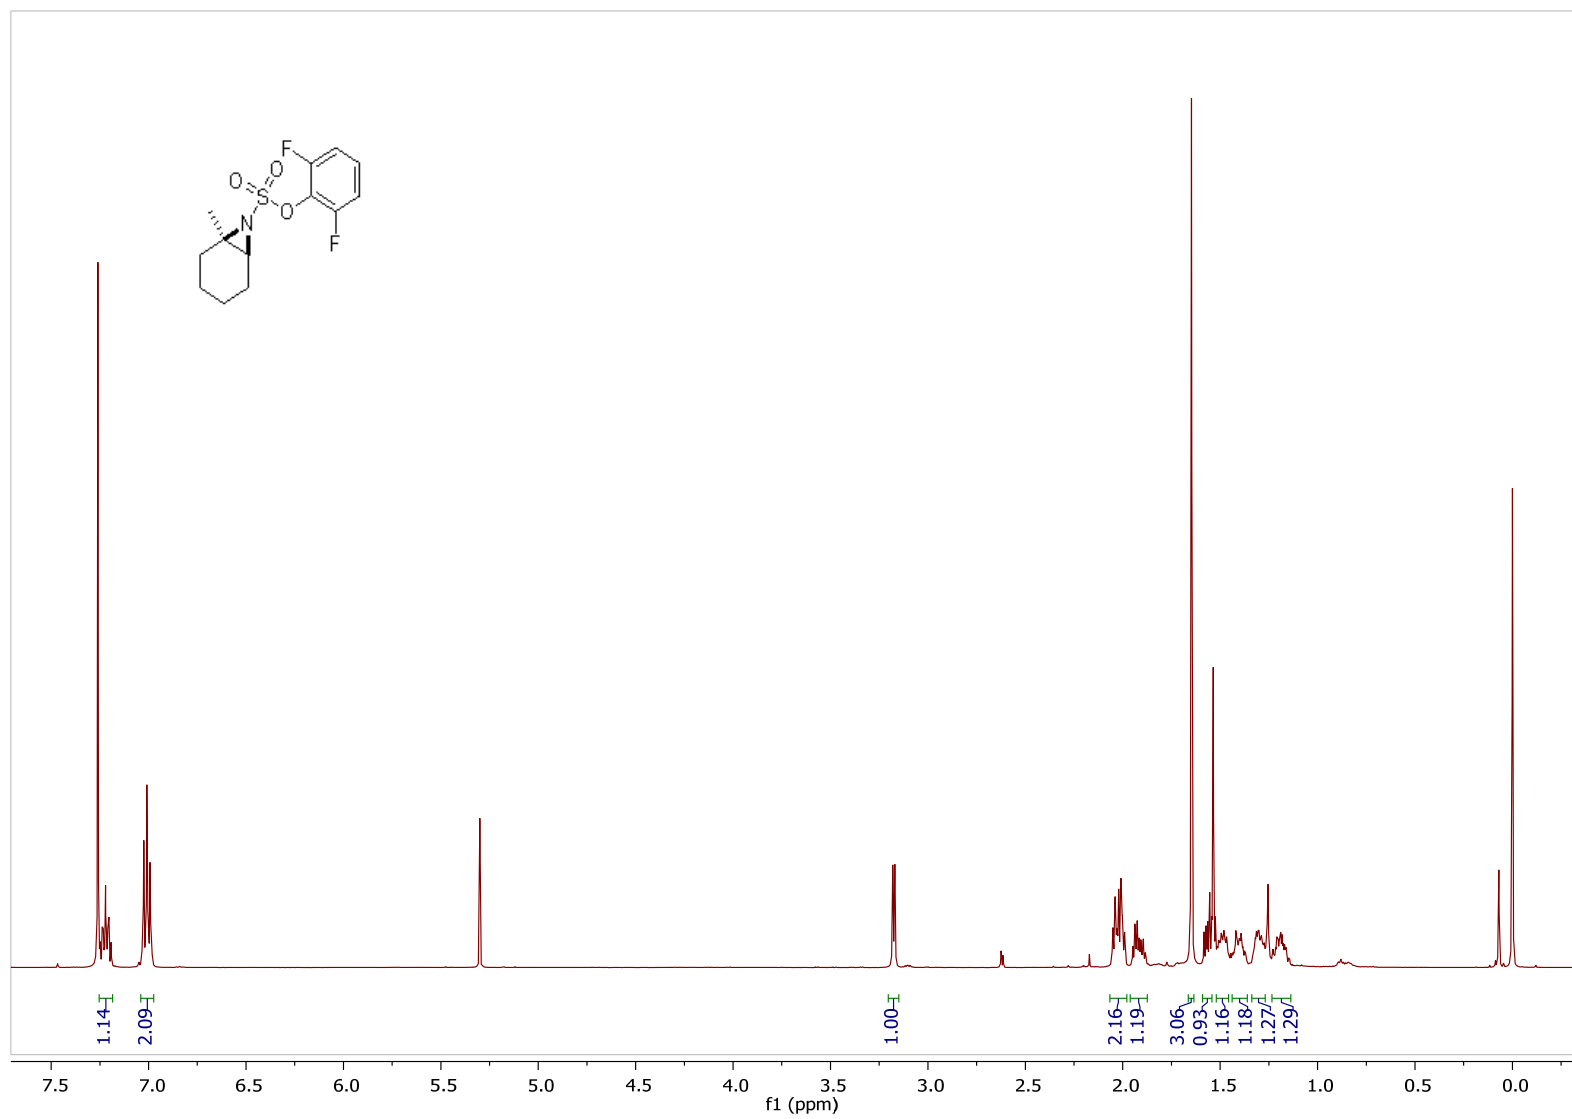

# Compound 11b.

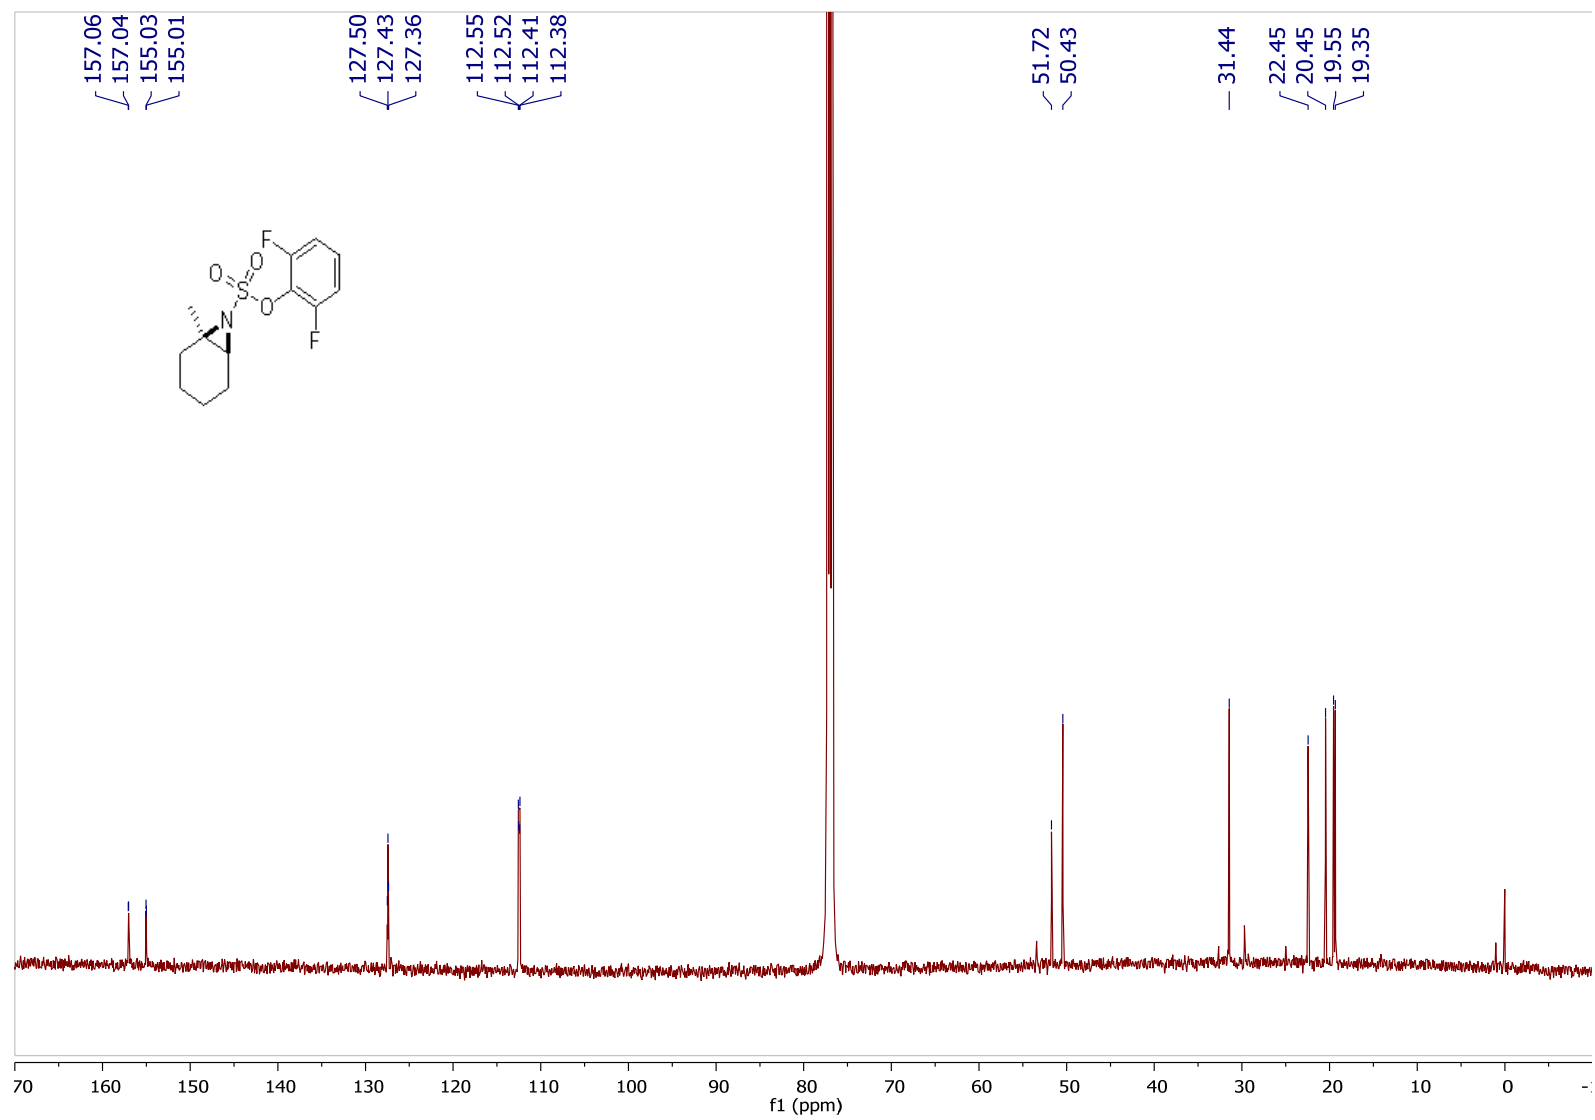

Compound 11d major.

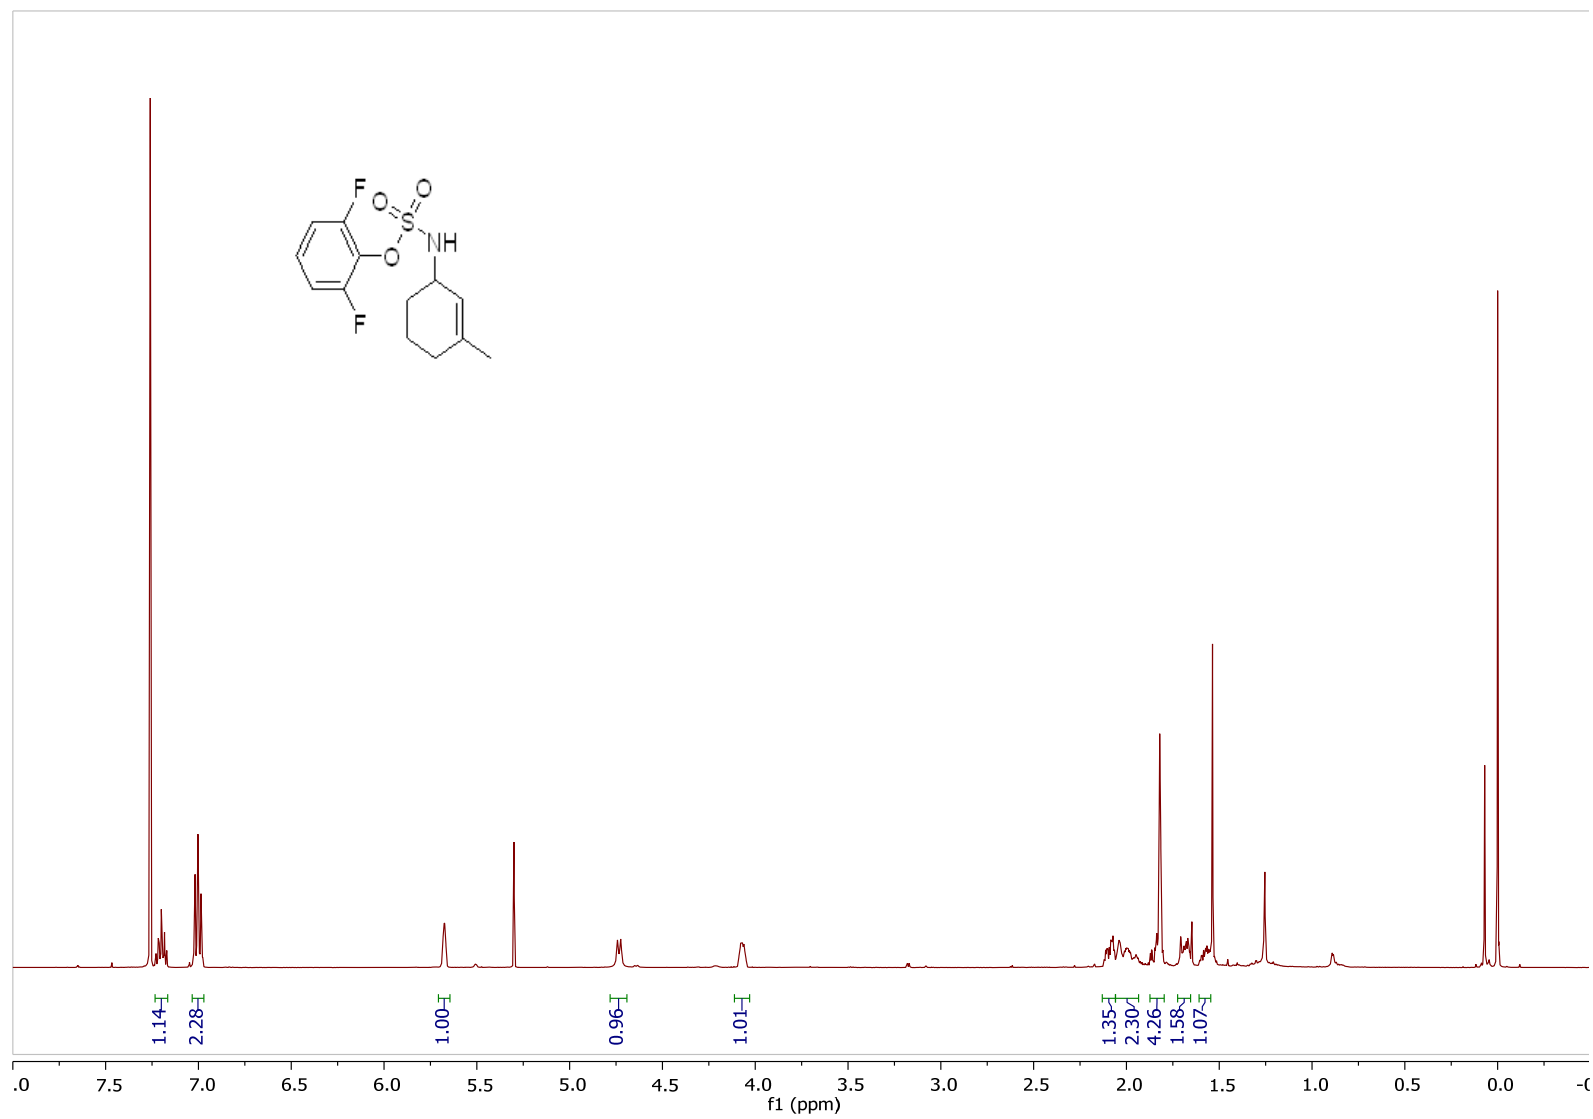

Compound 11d major.

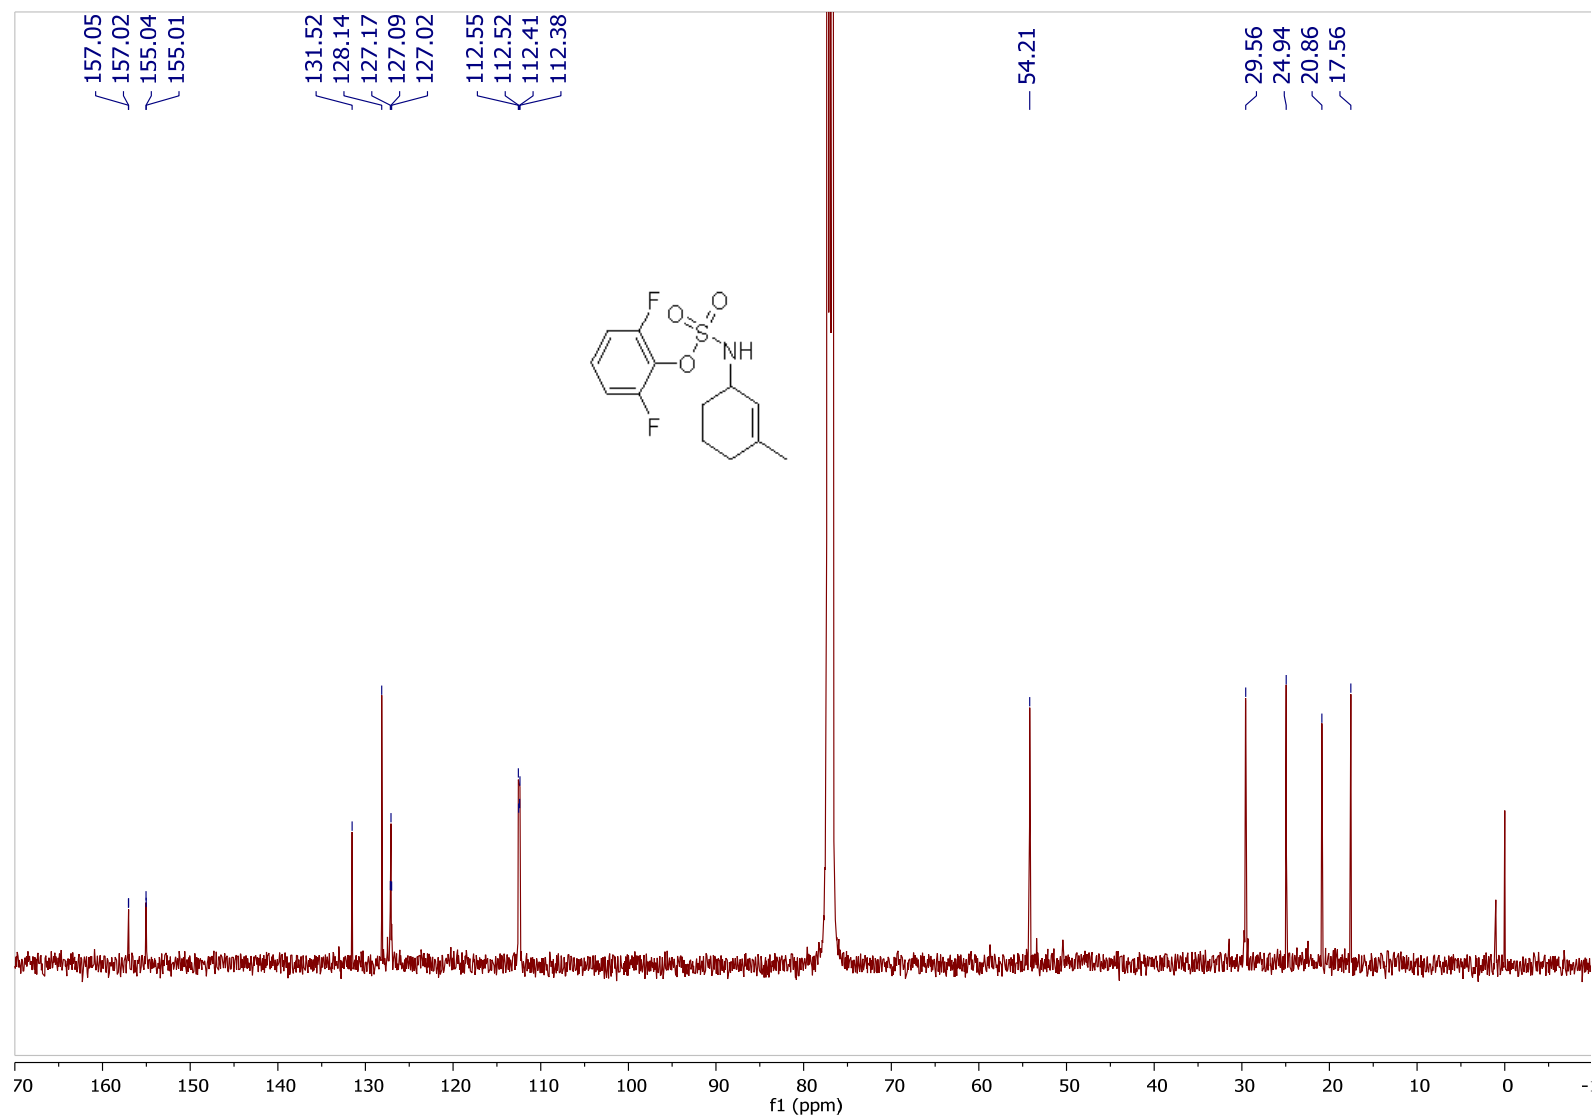

Compound 12a ring-opened.

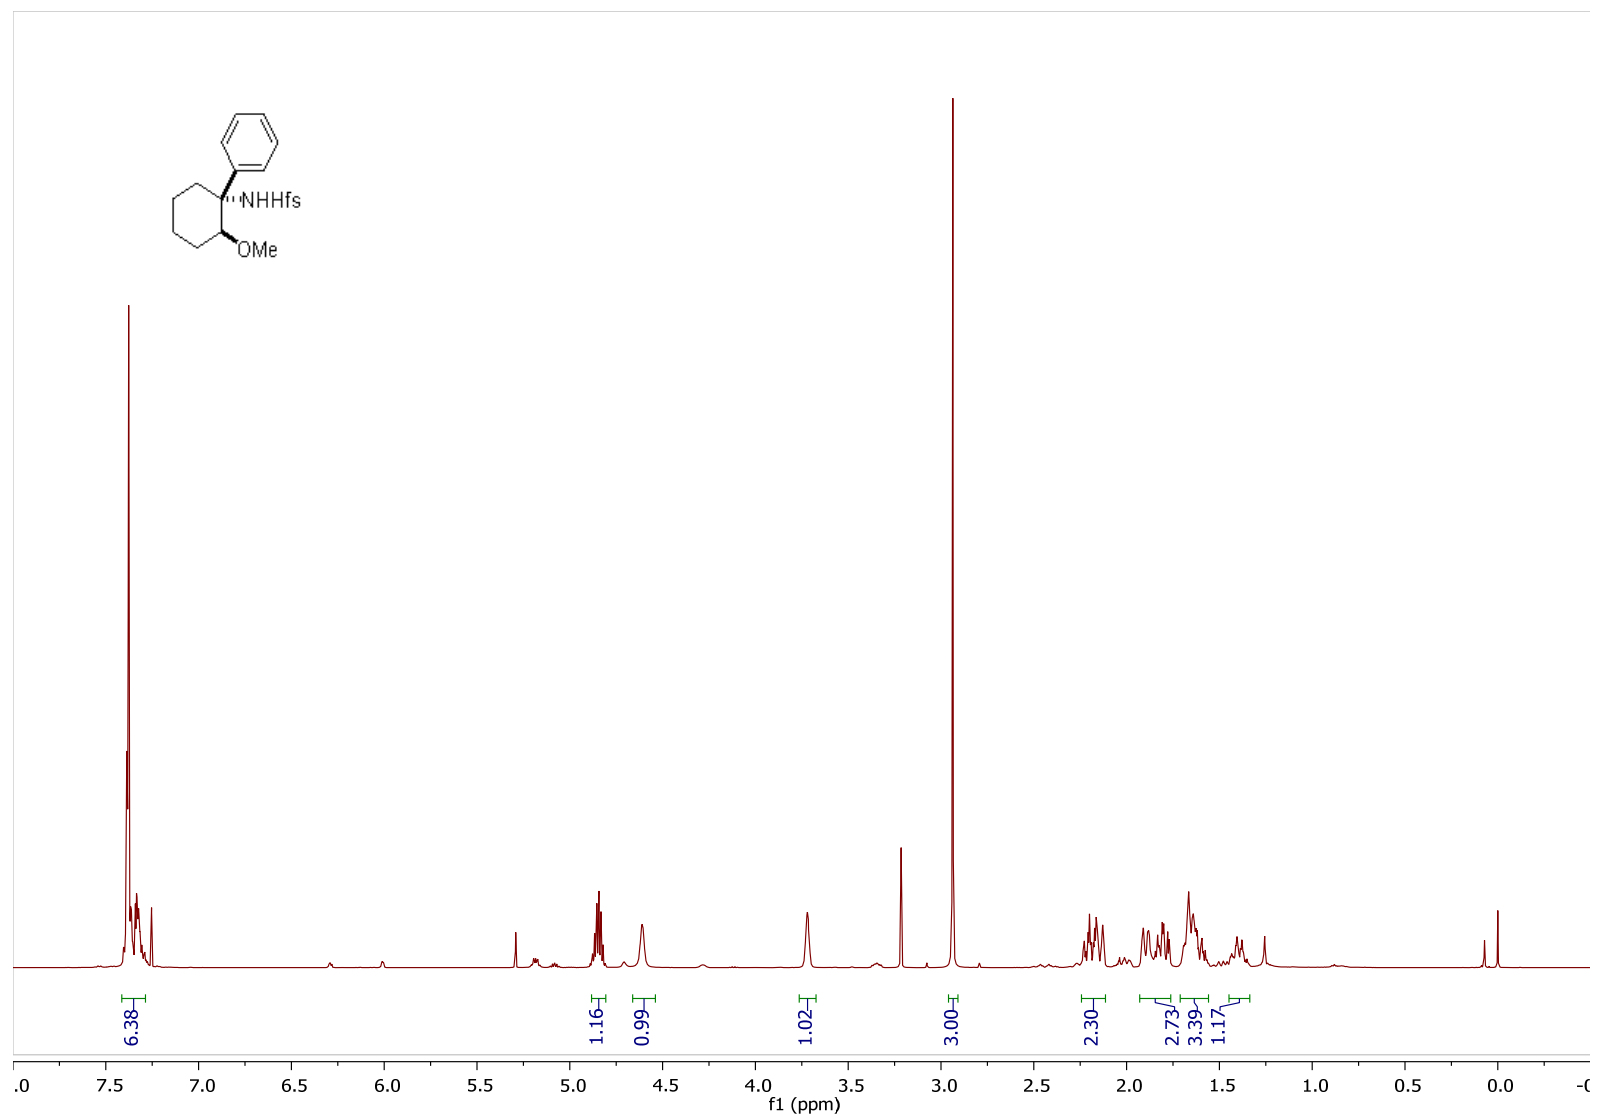

Compound 12a ring-opened.

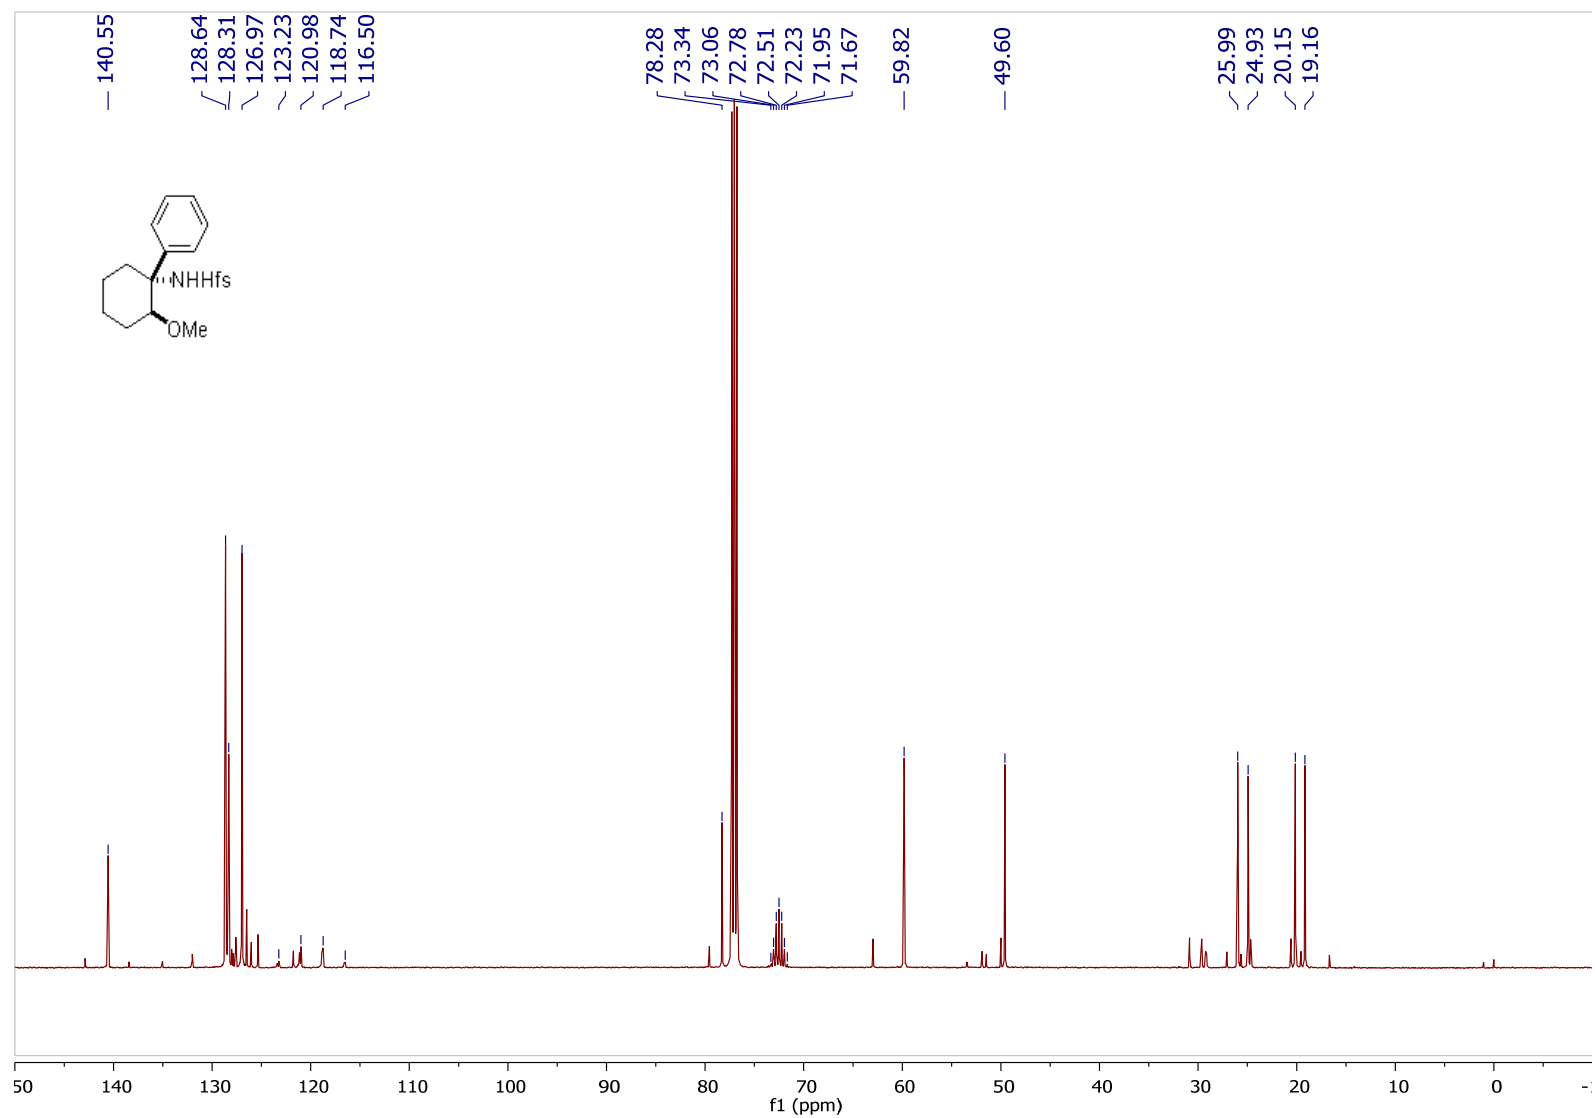

# Compound 12c

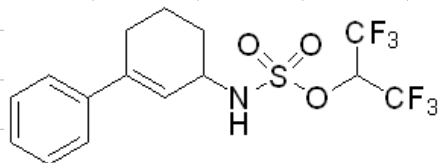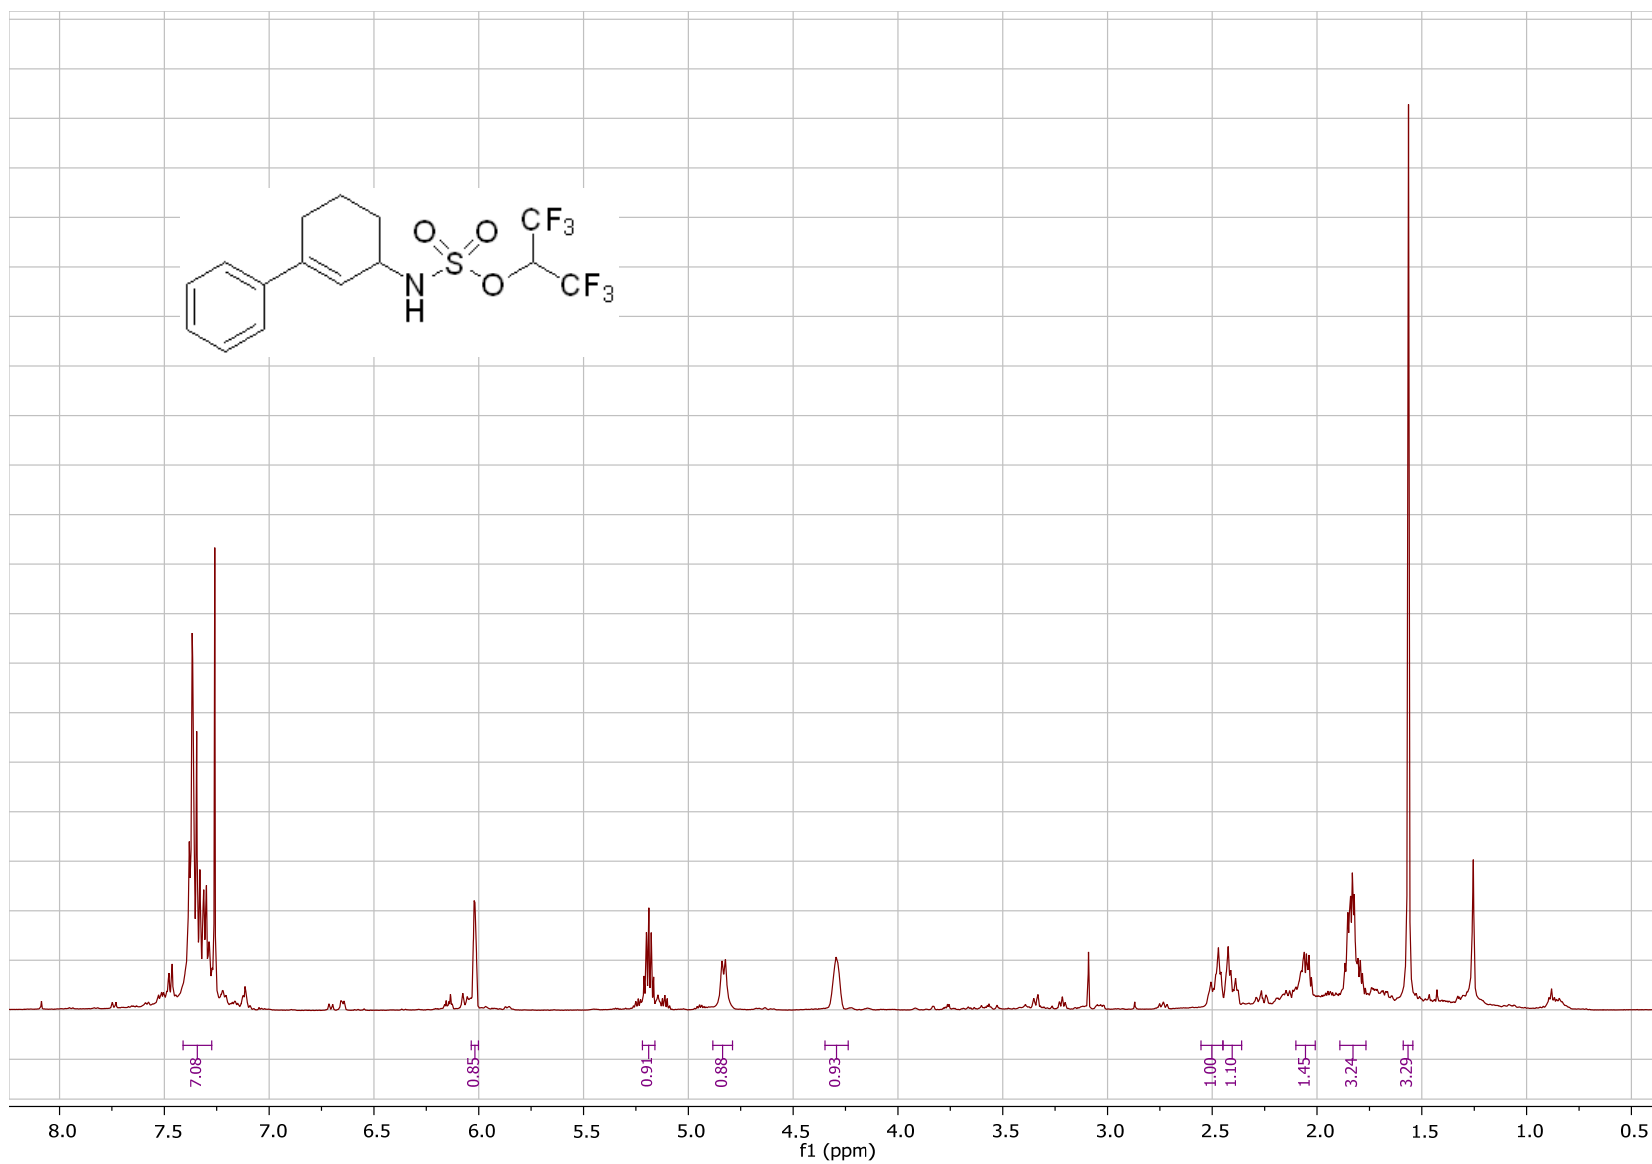

# Compound 12c

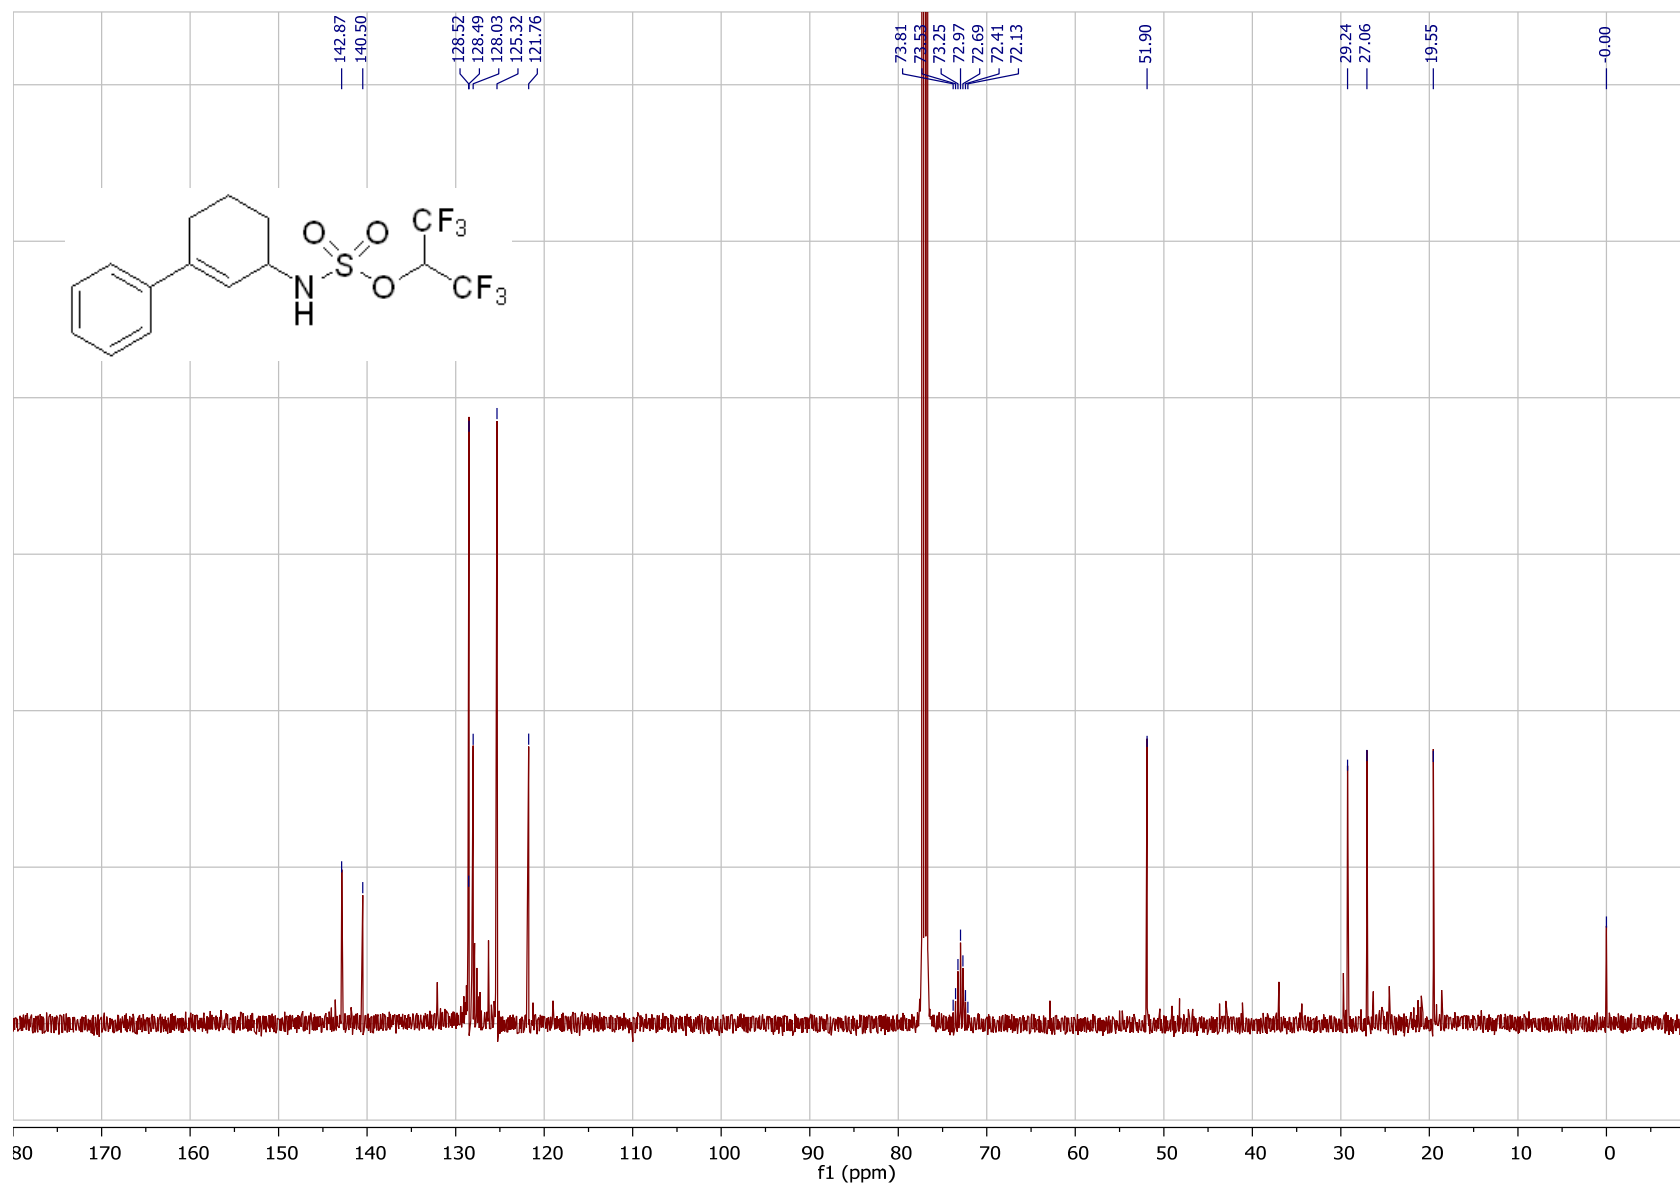



Compound 12d.

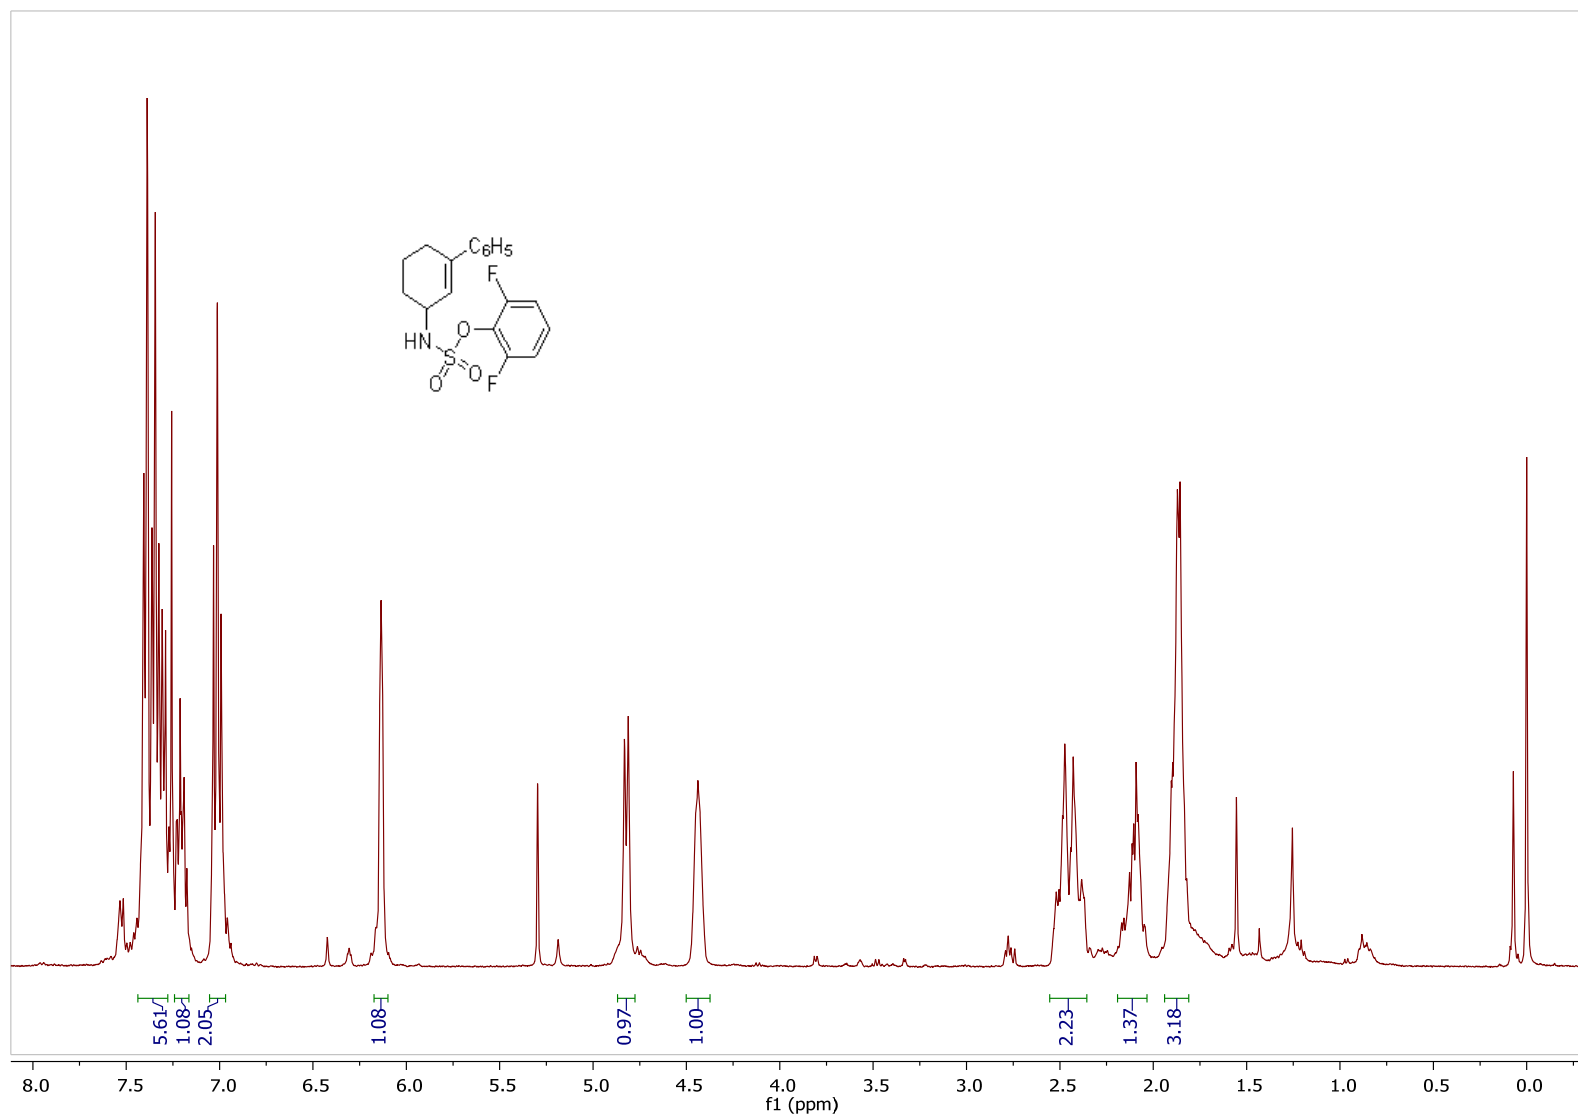

Compound 12d.

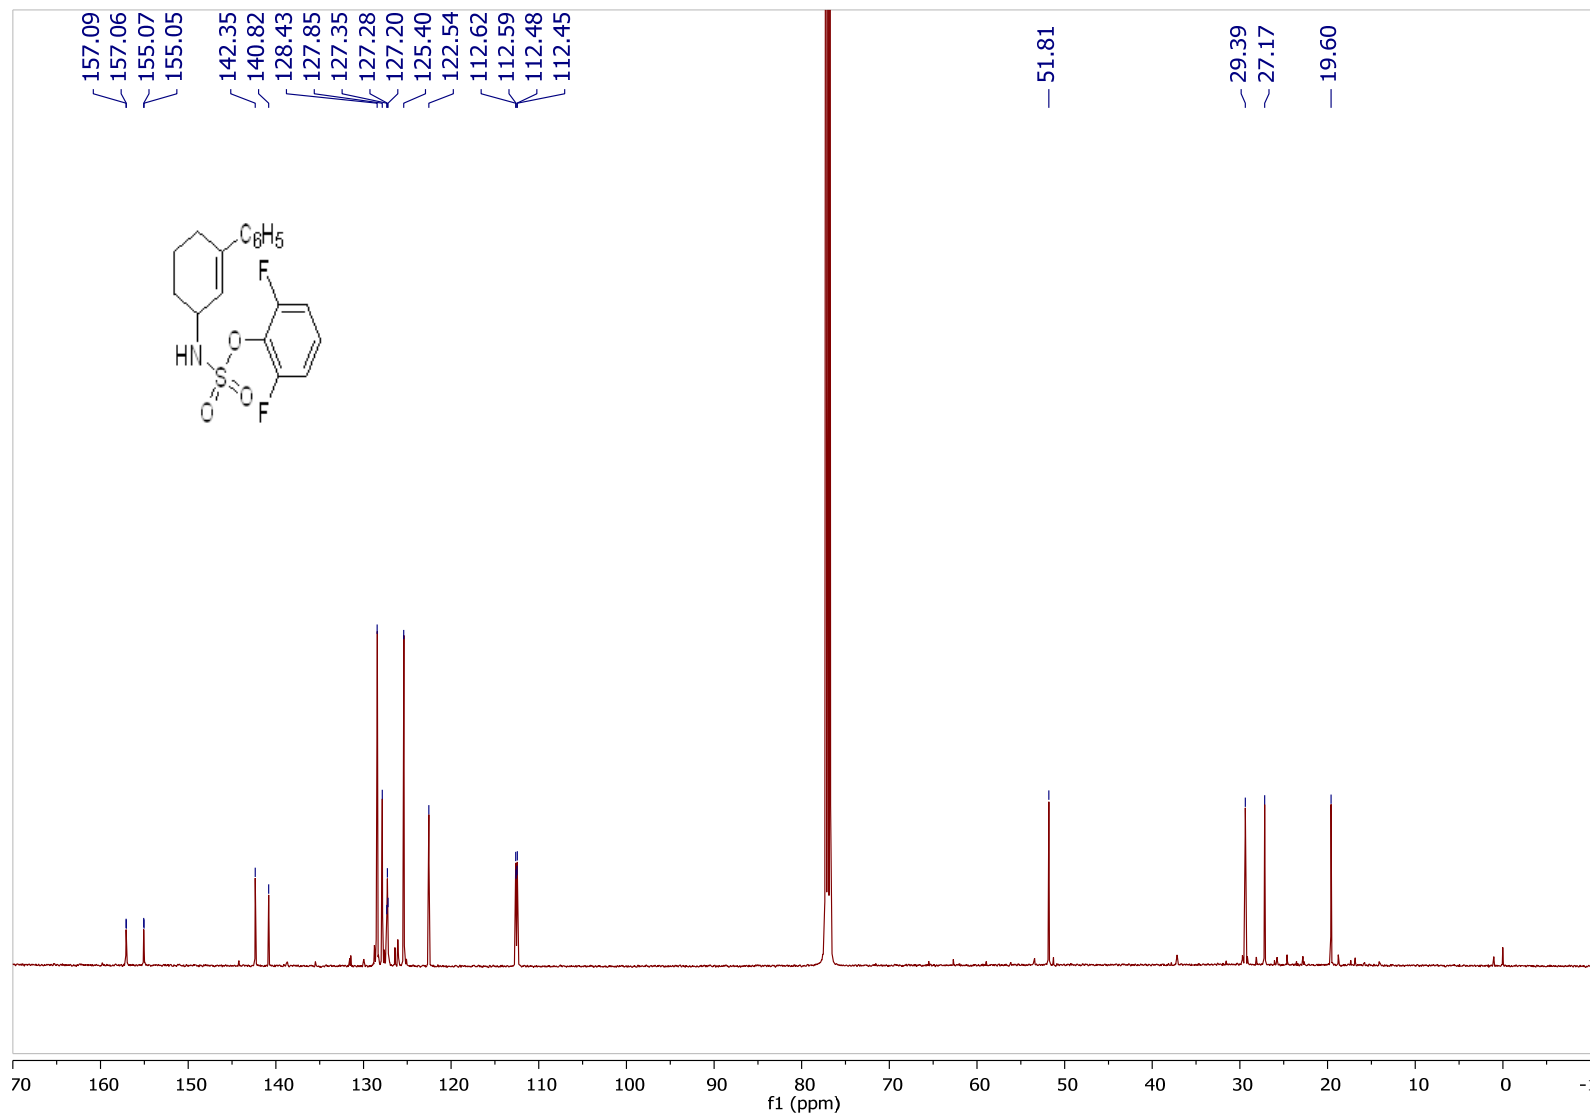

Compound 13d H<sub>a</sub>.

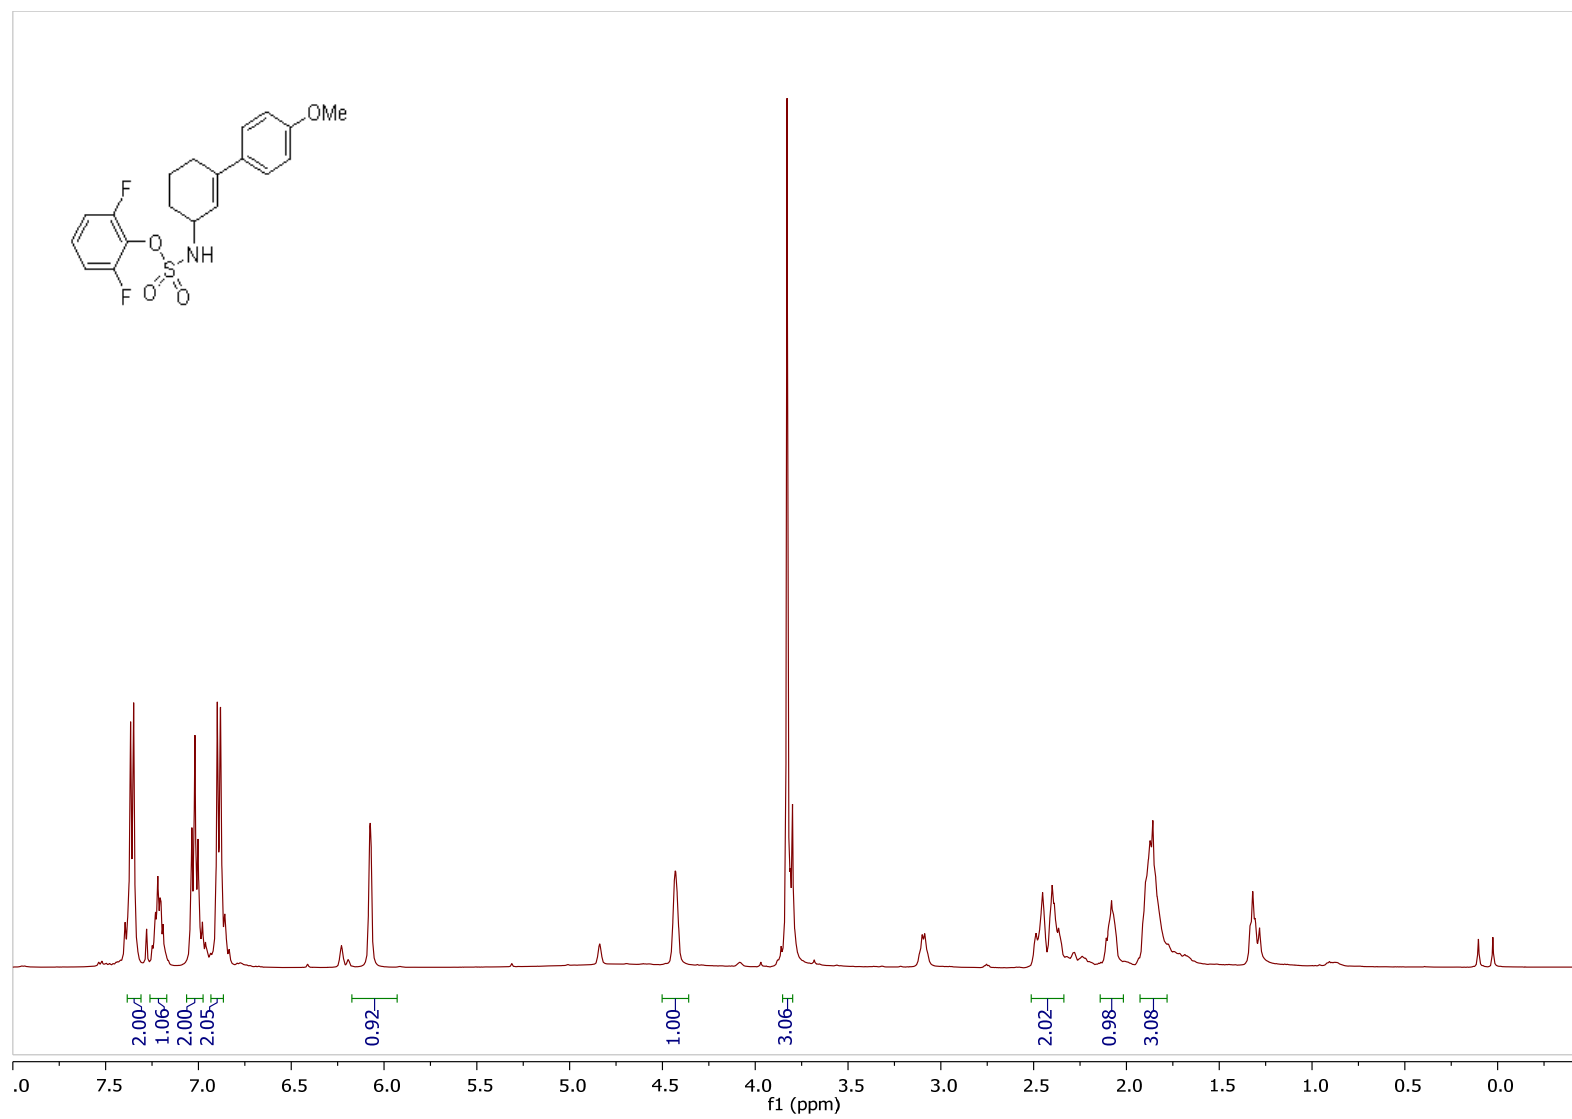

Compound 13d H<sub>a</sub>.

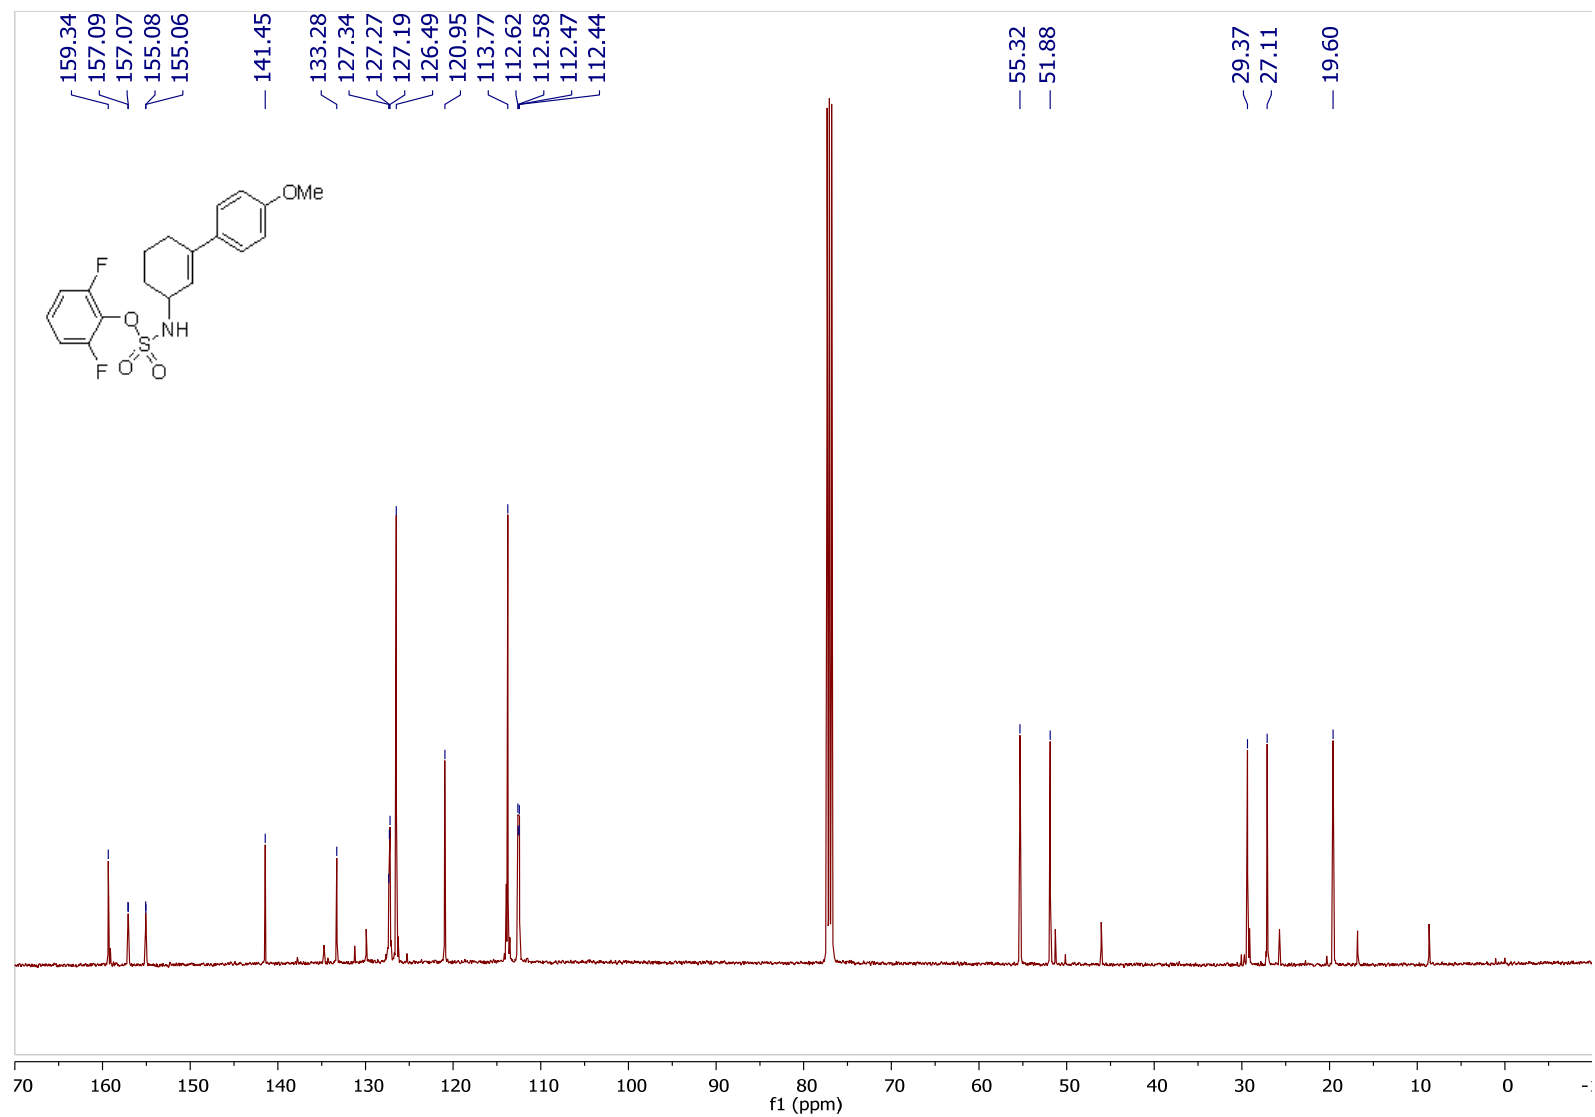

Compound 14a ring-opened.

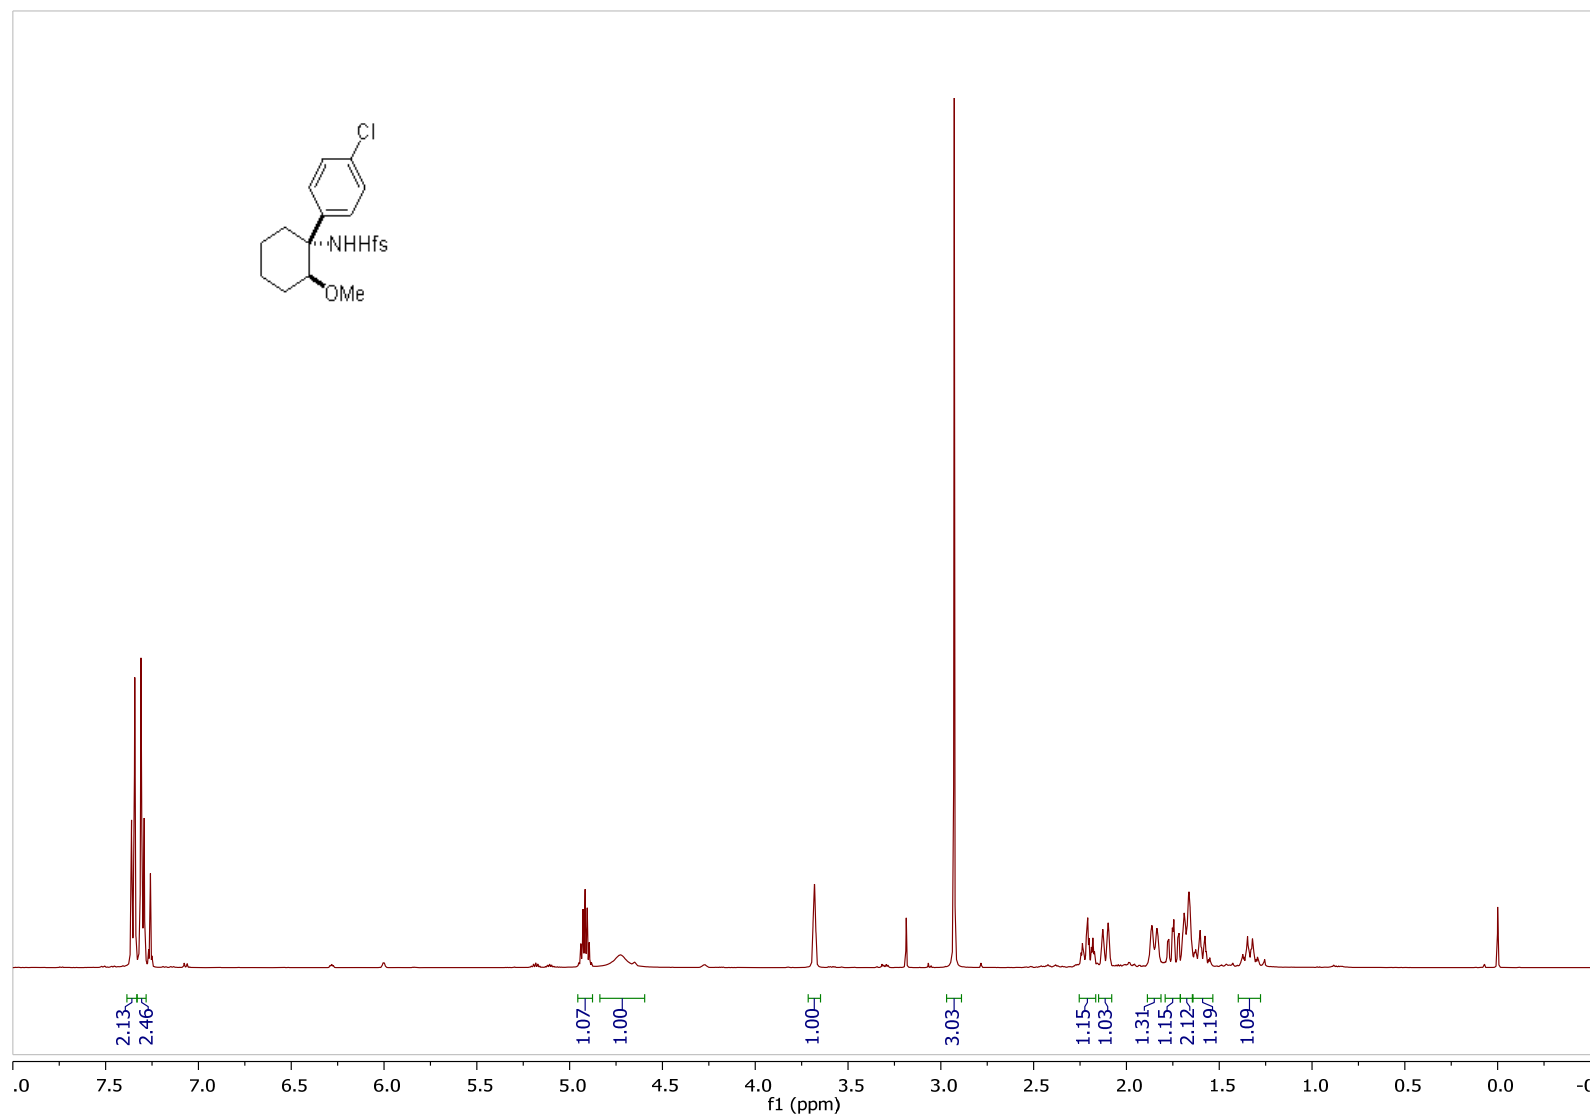

Compound 14a ring-opened.

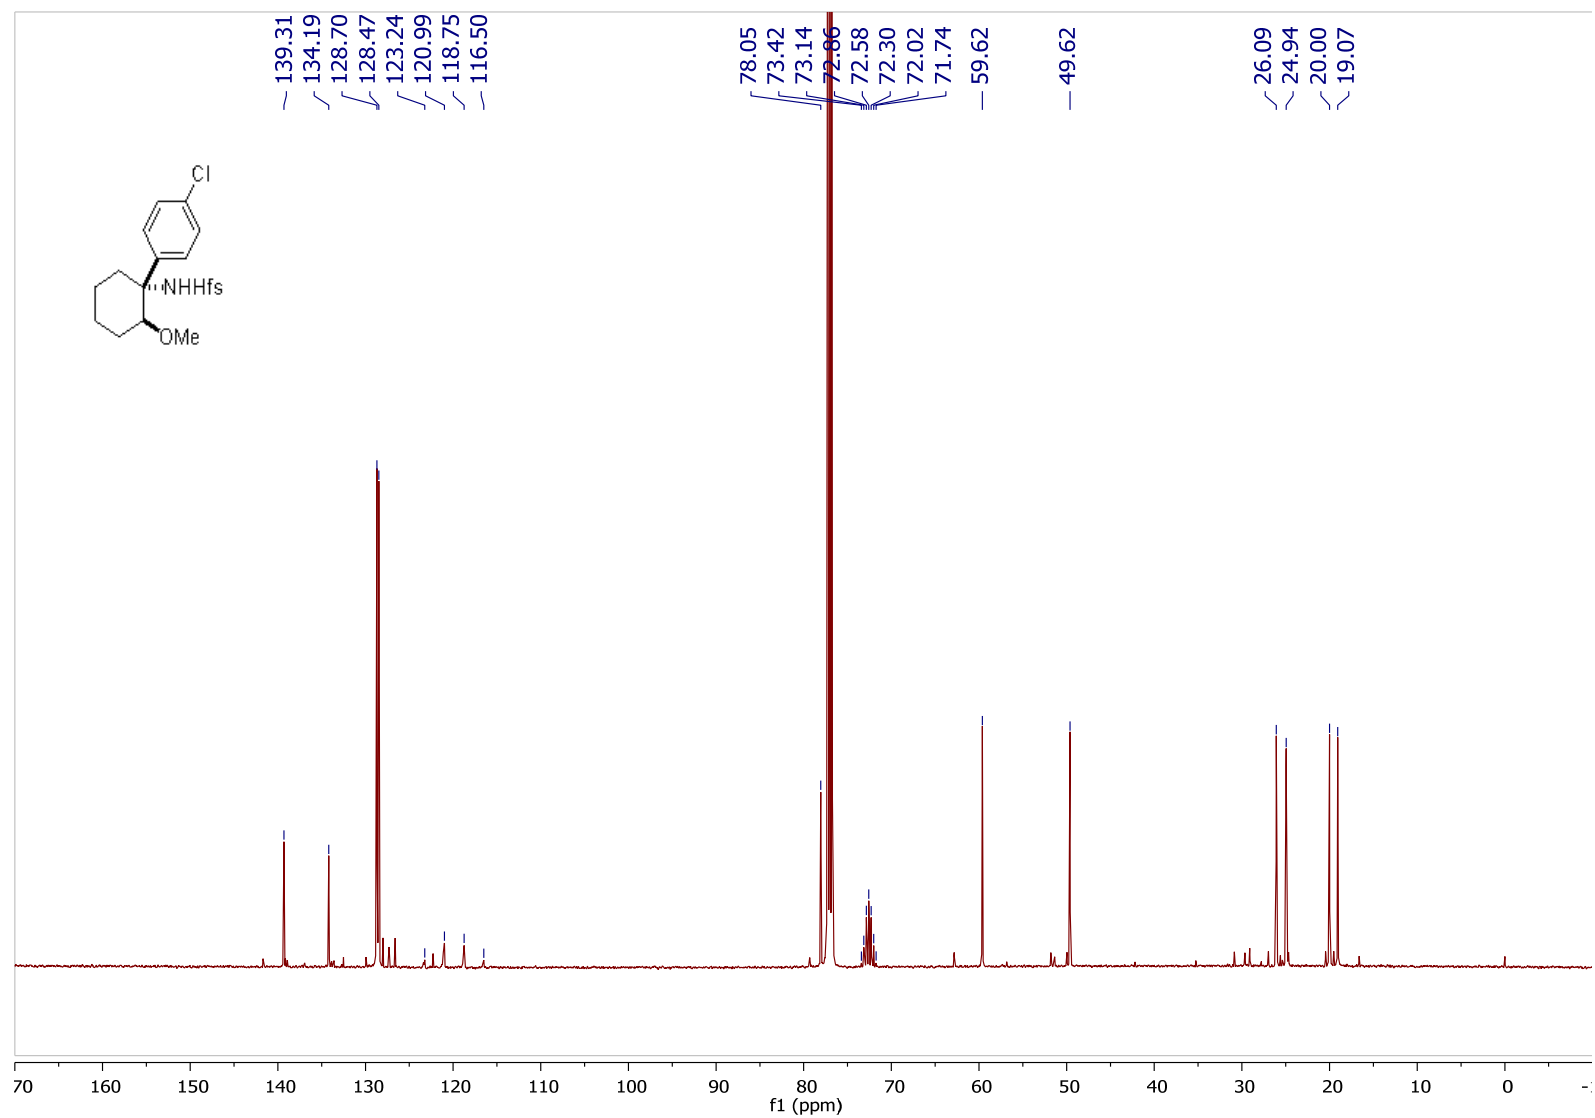

**Compound 14d.**

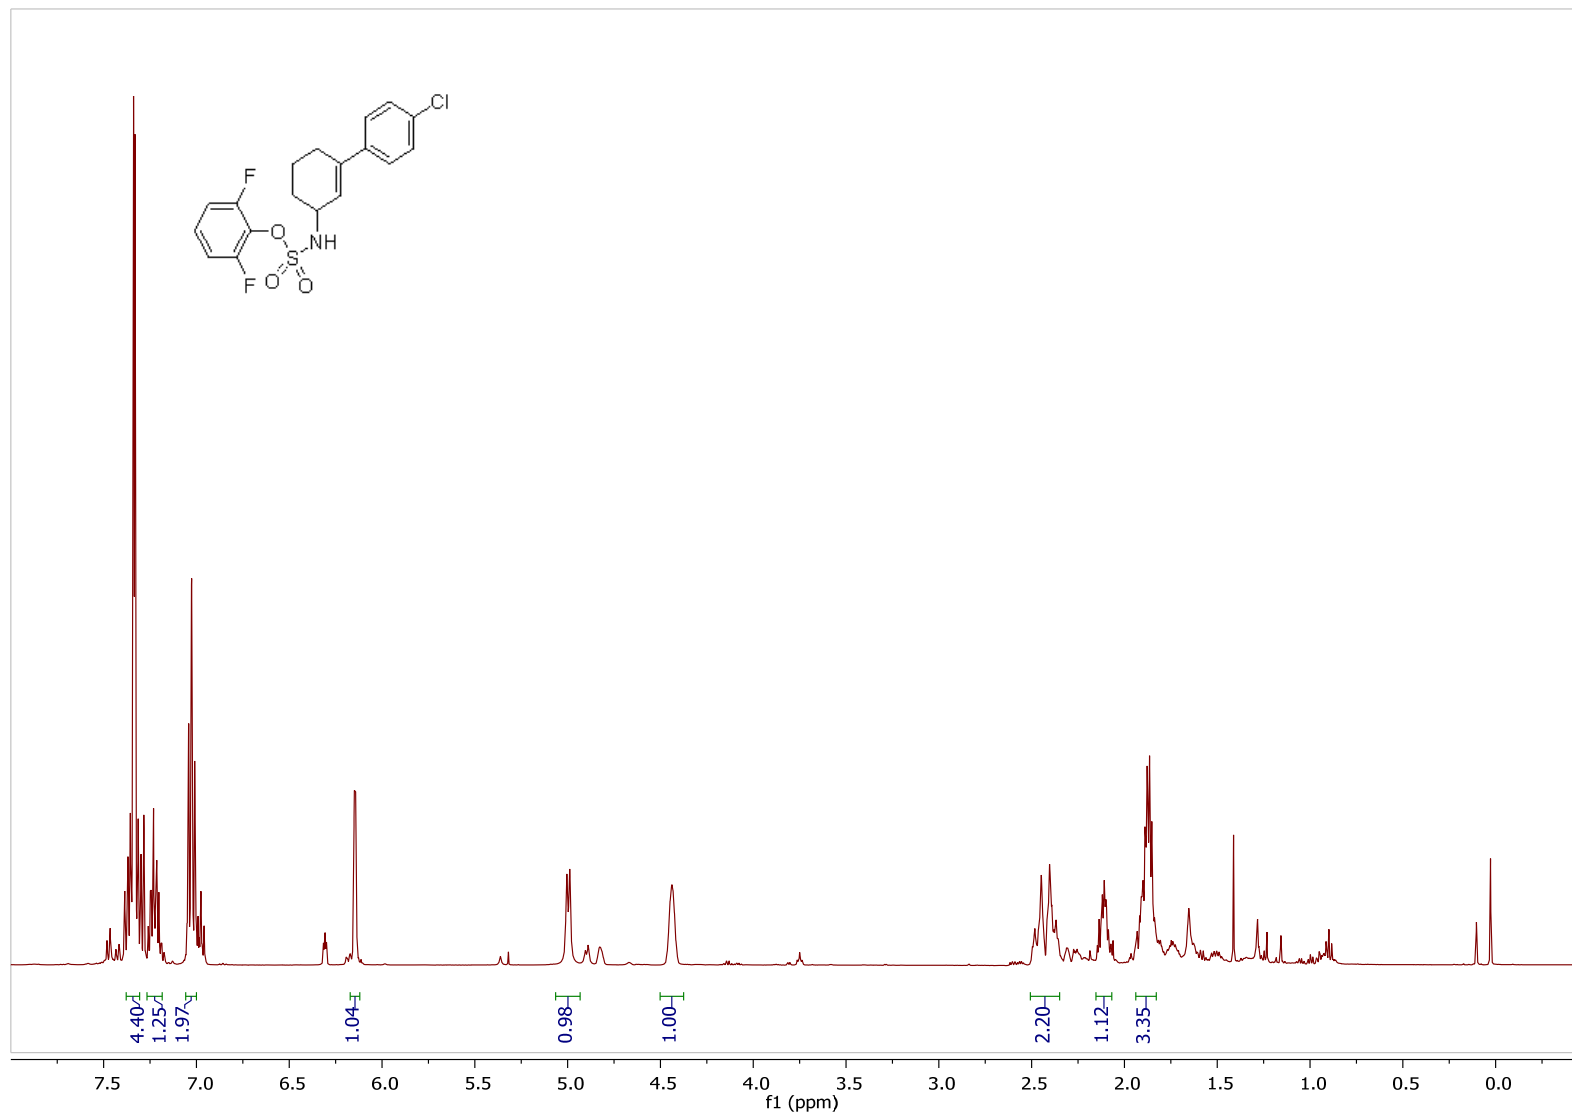

**Compound 14d.**

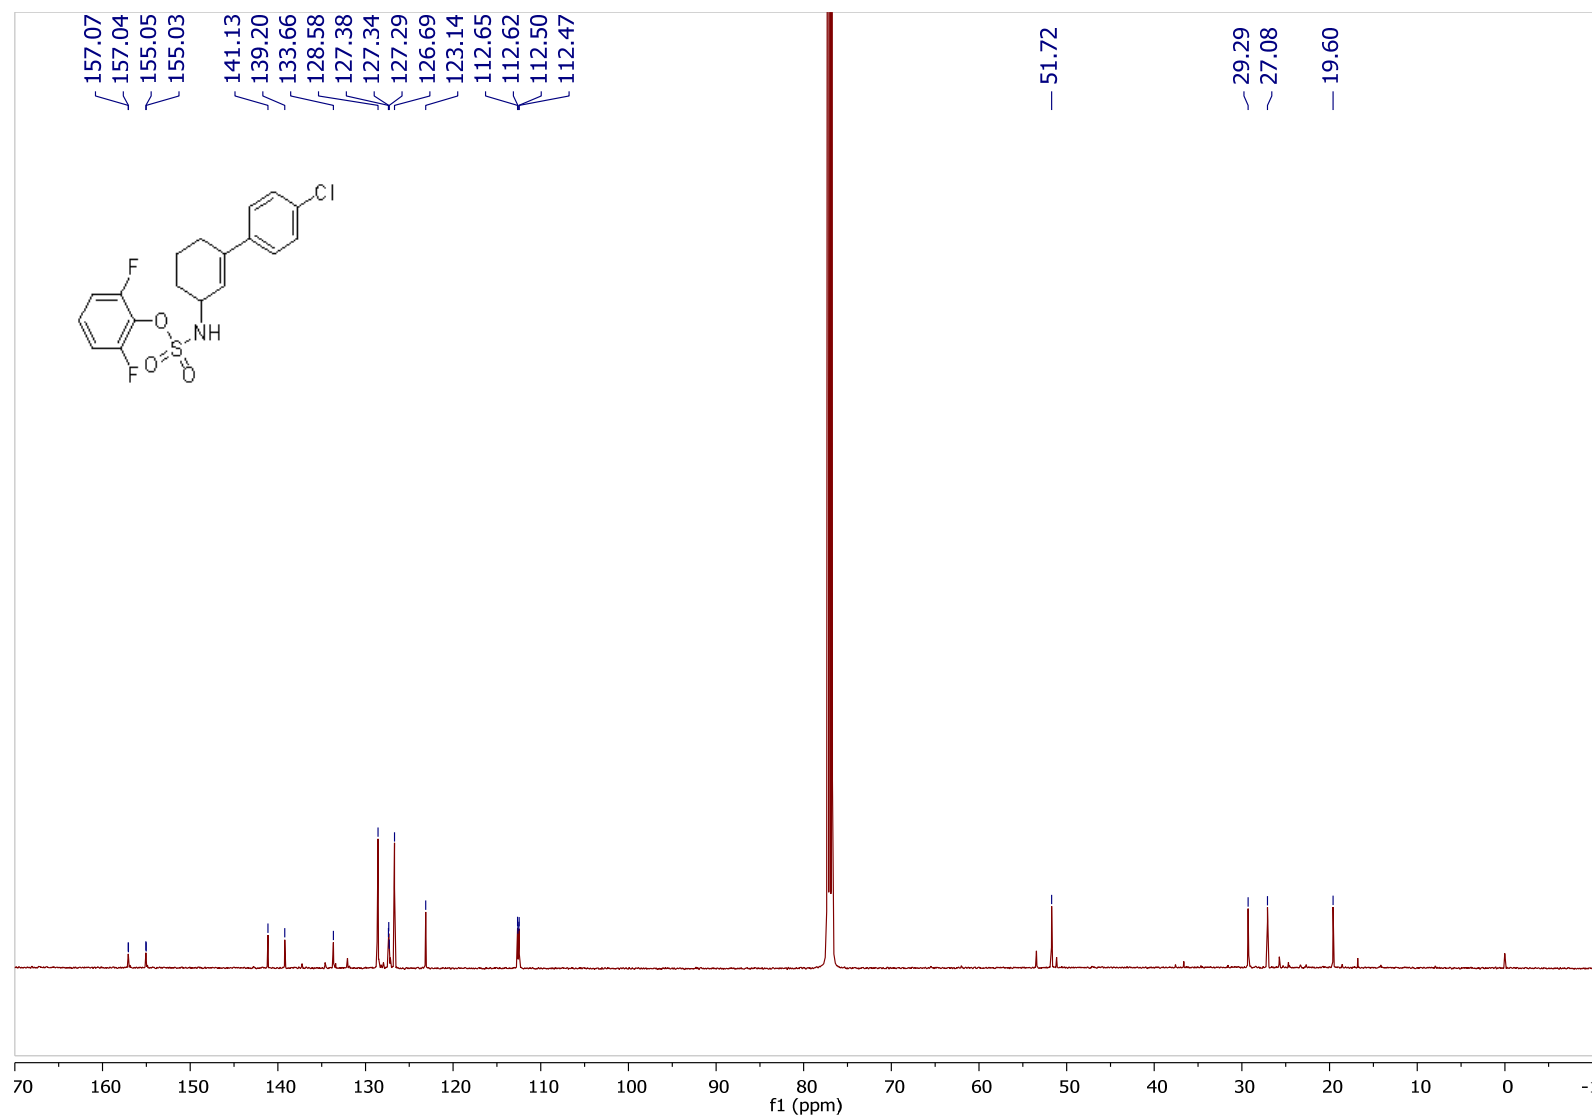



Compound 15a.

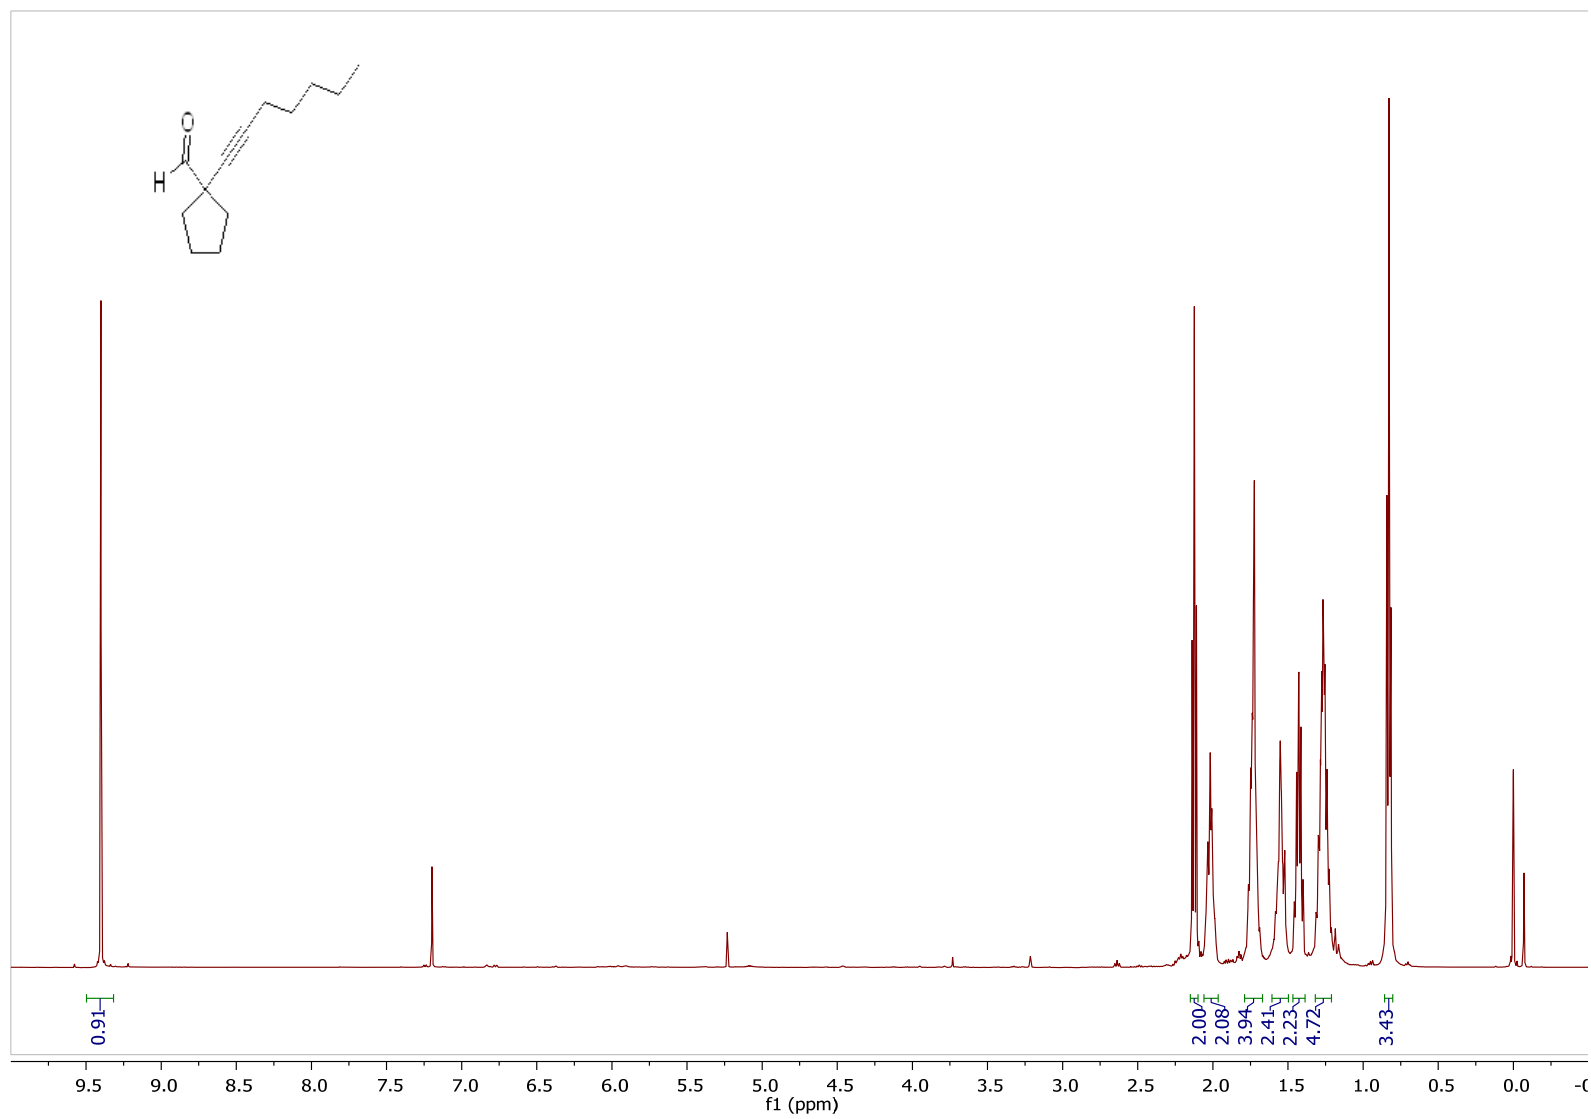

Compound 15a.

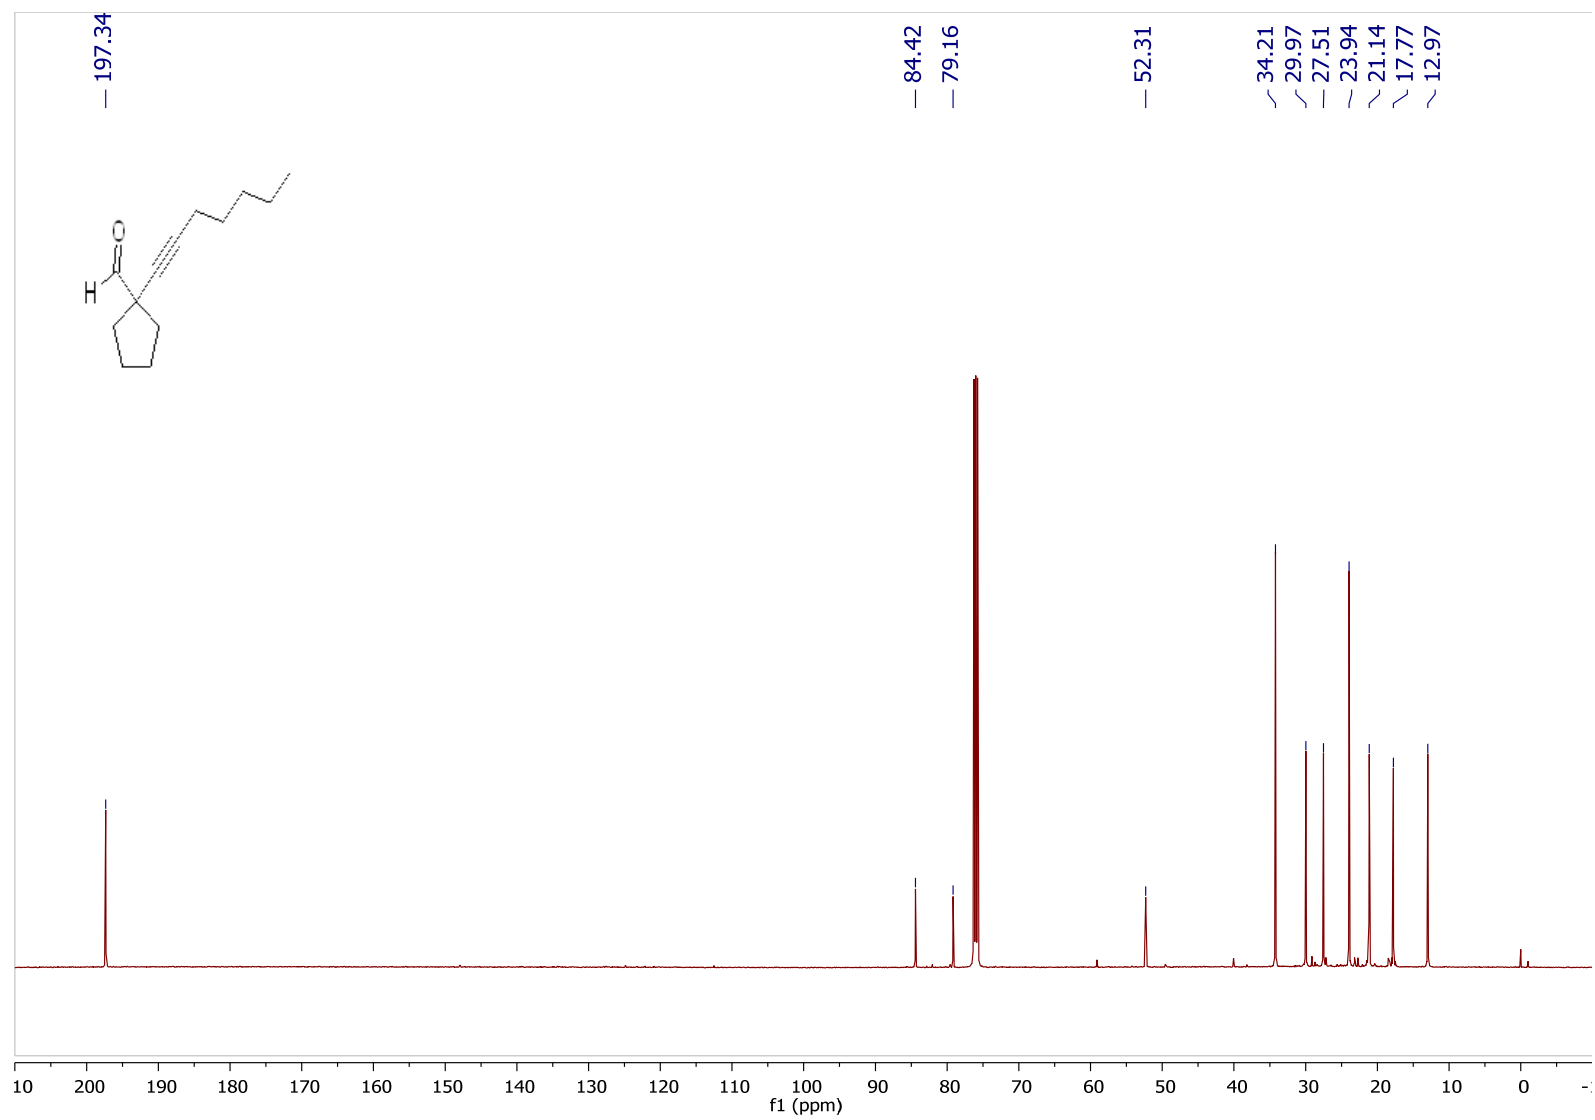

# Compound 15d.

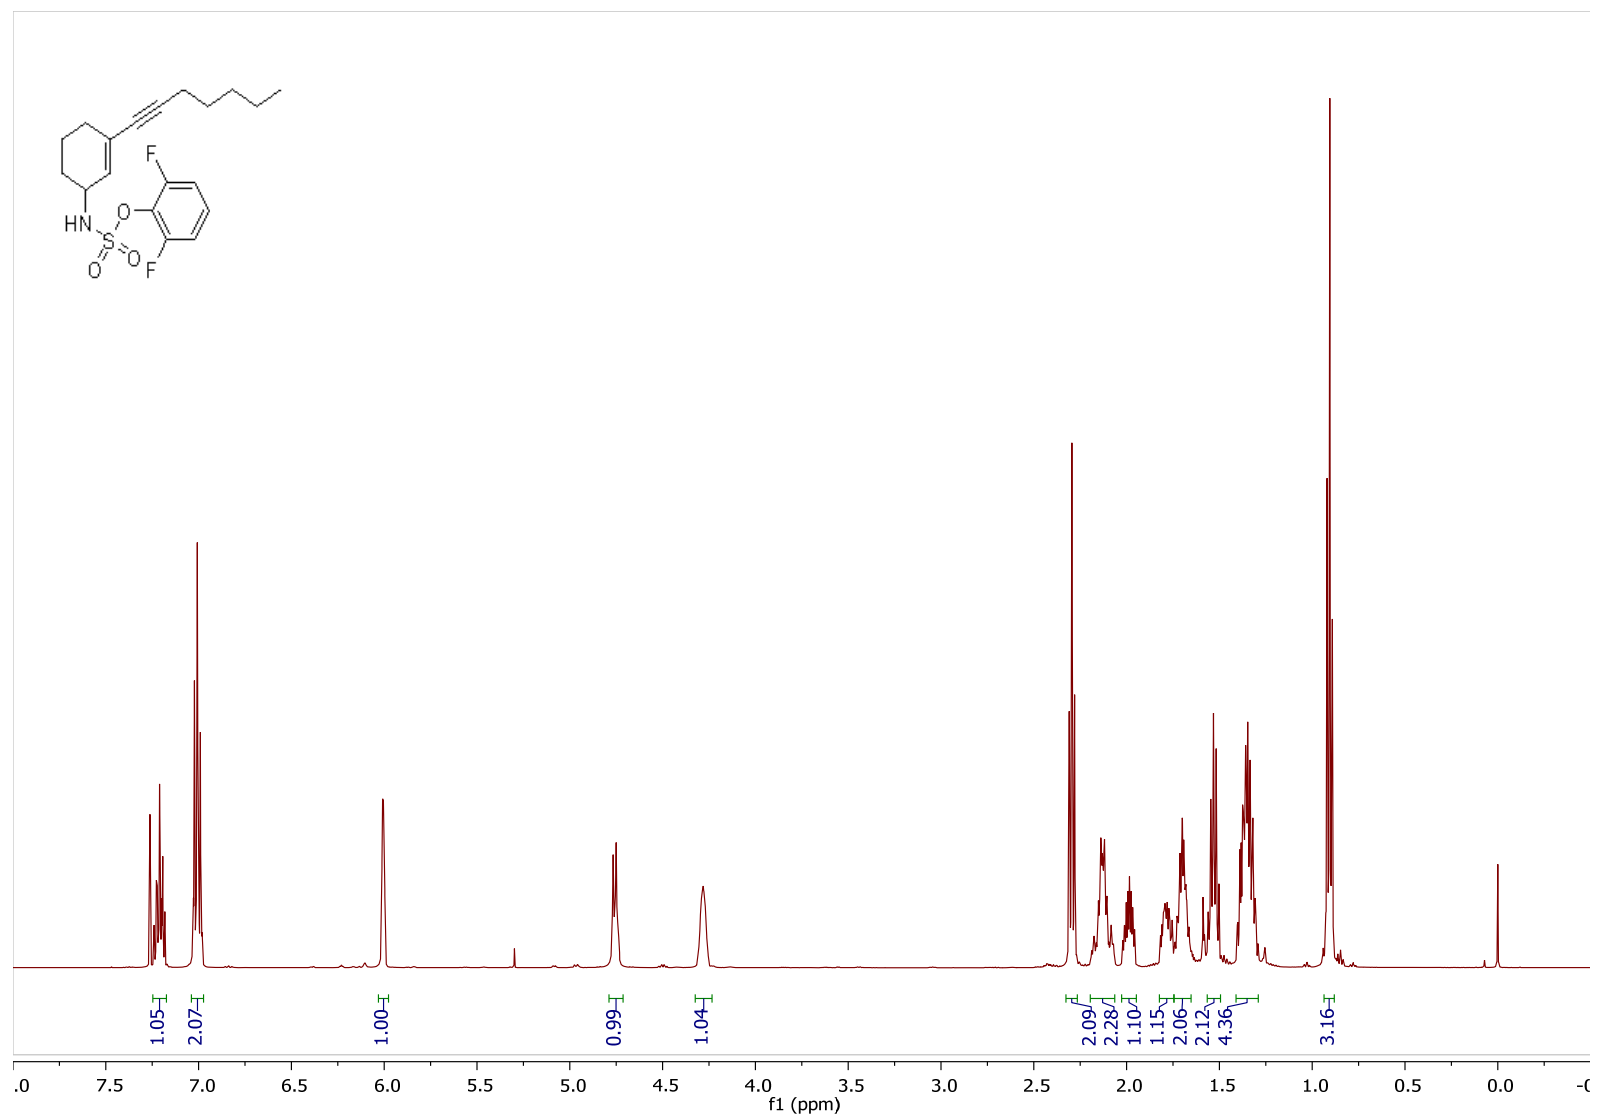

# Compound 15d.

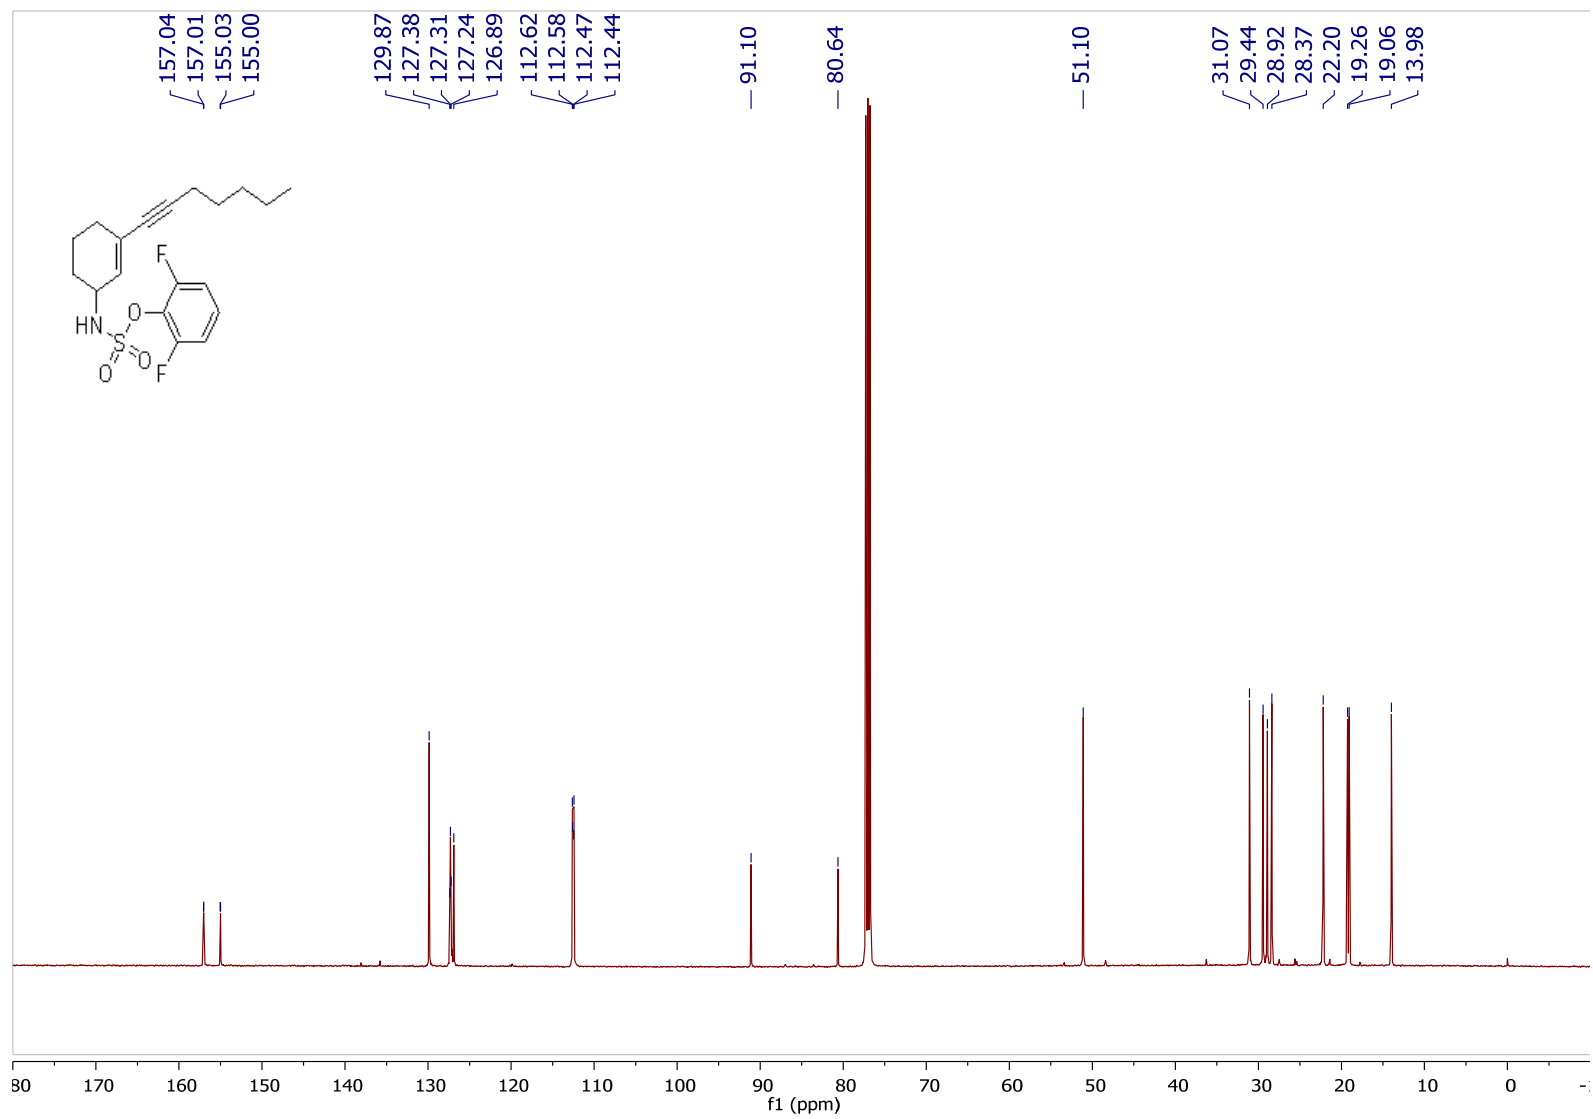

# Compound 16a

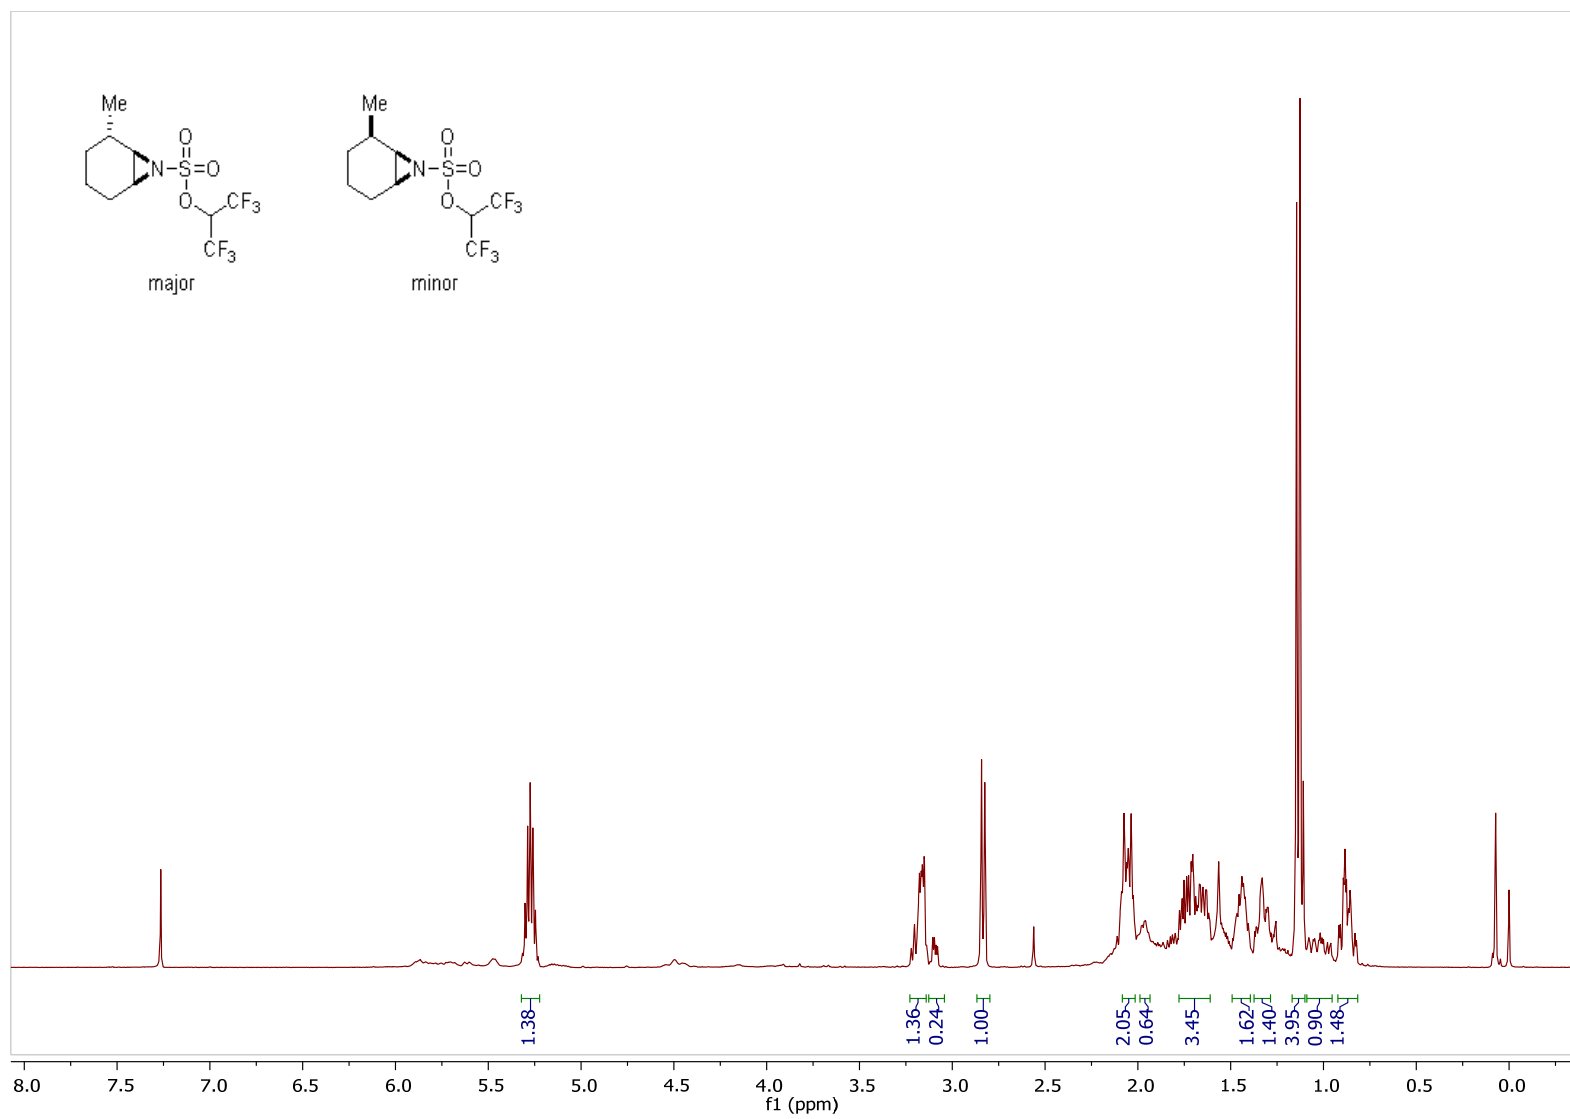

# Compound 16a

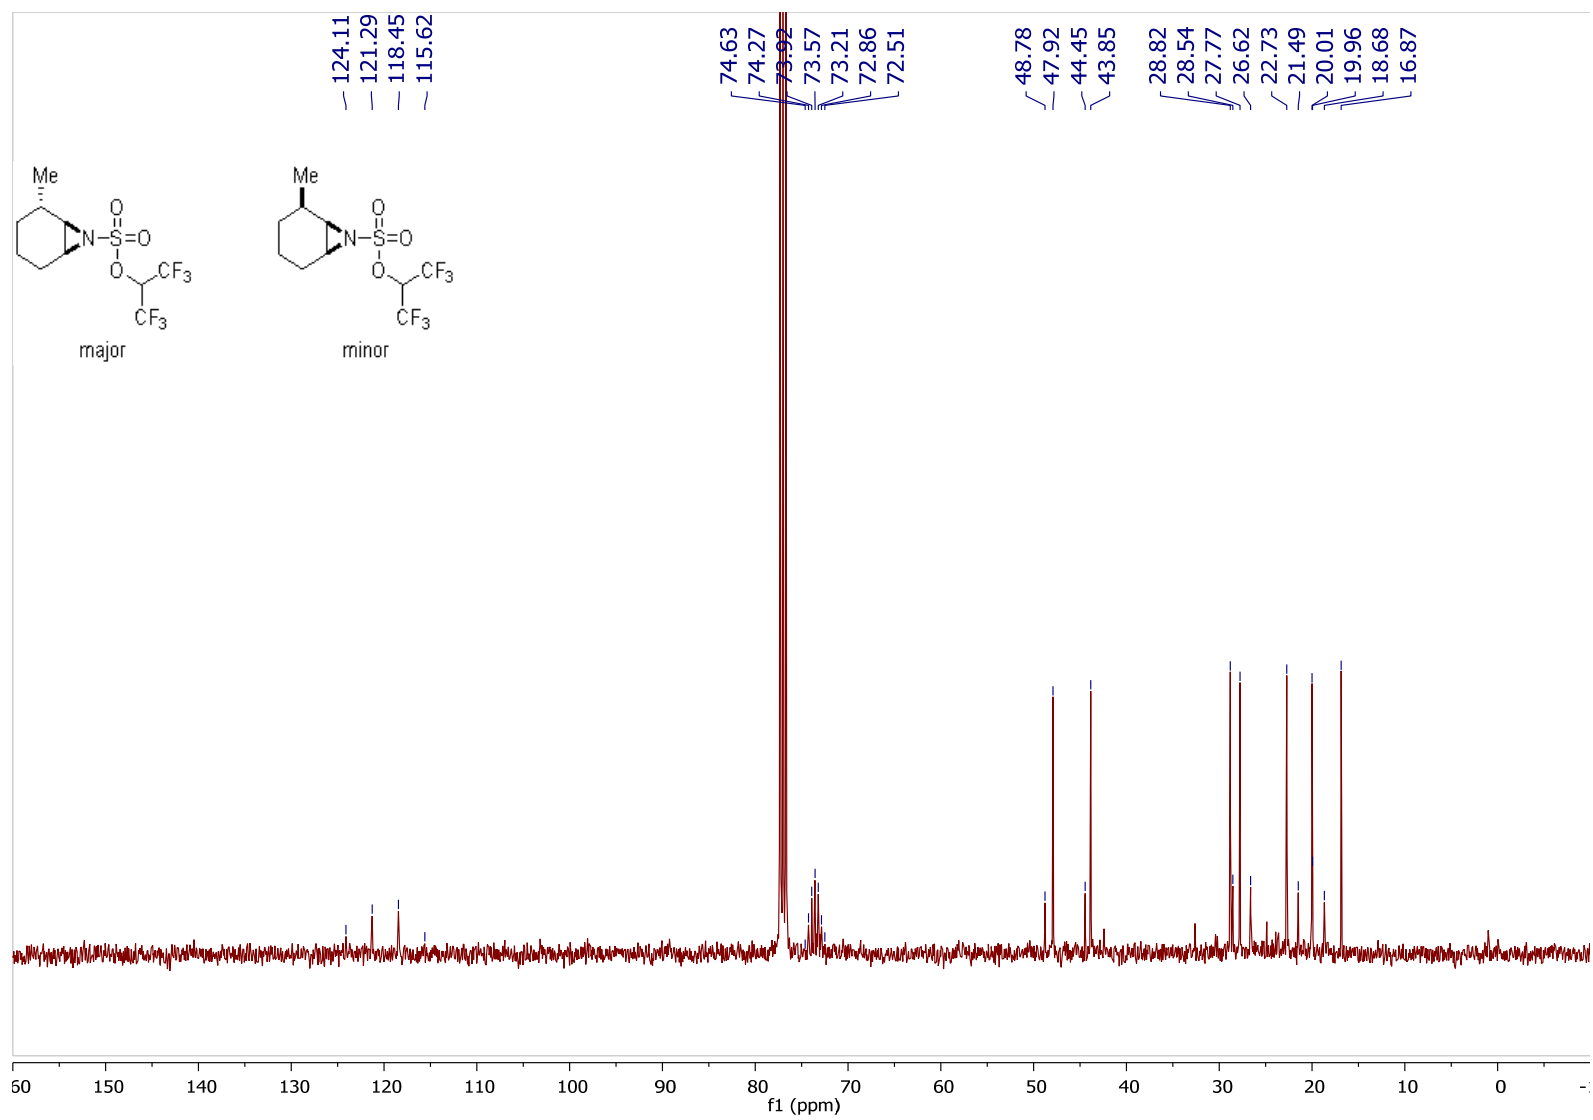

# Compound 16ca and 16cb

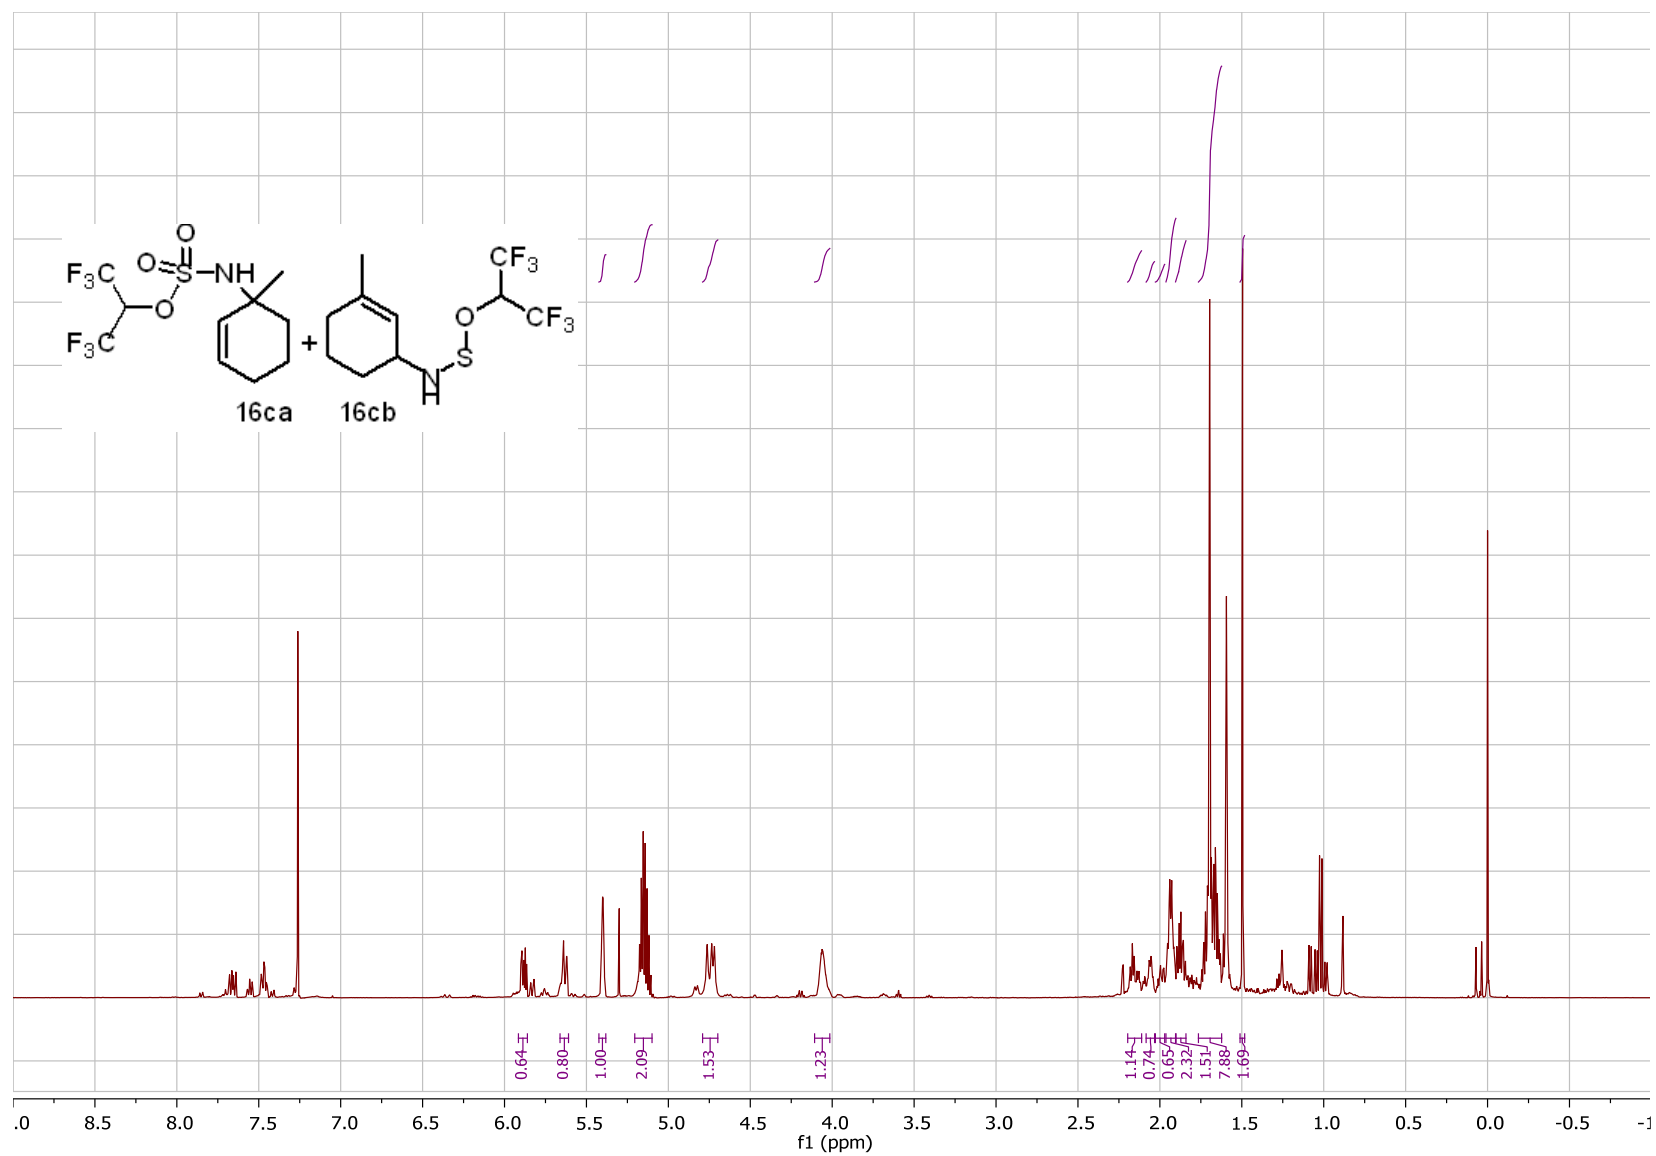

# Compound 16ca and 16cb

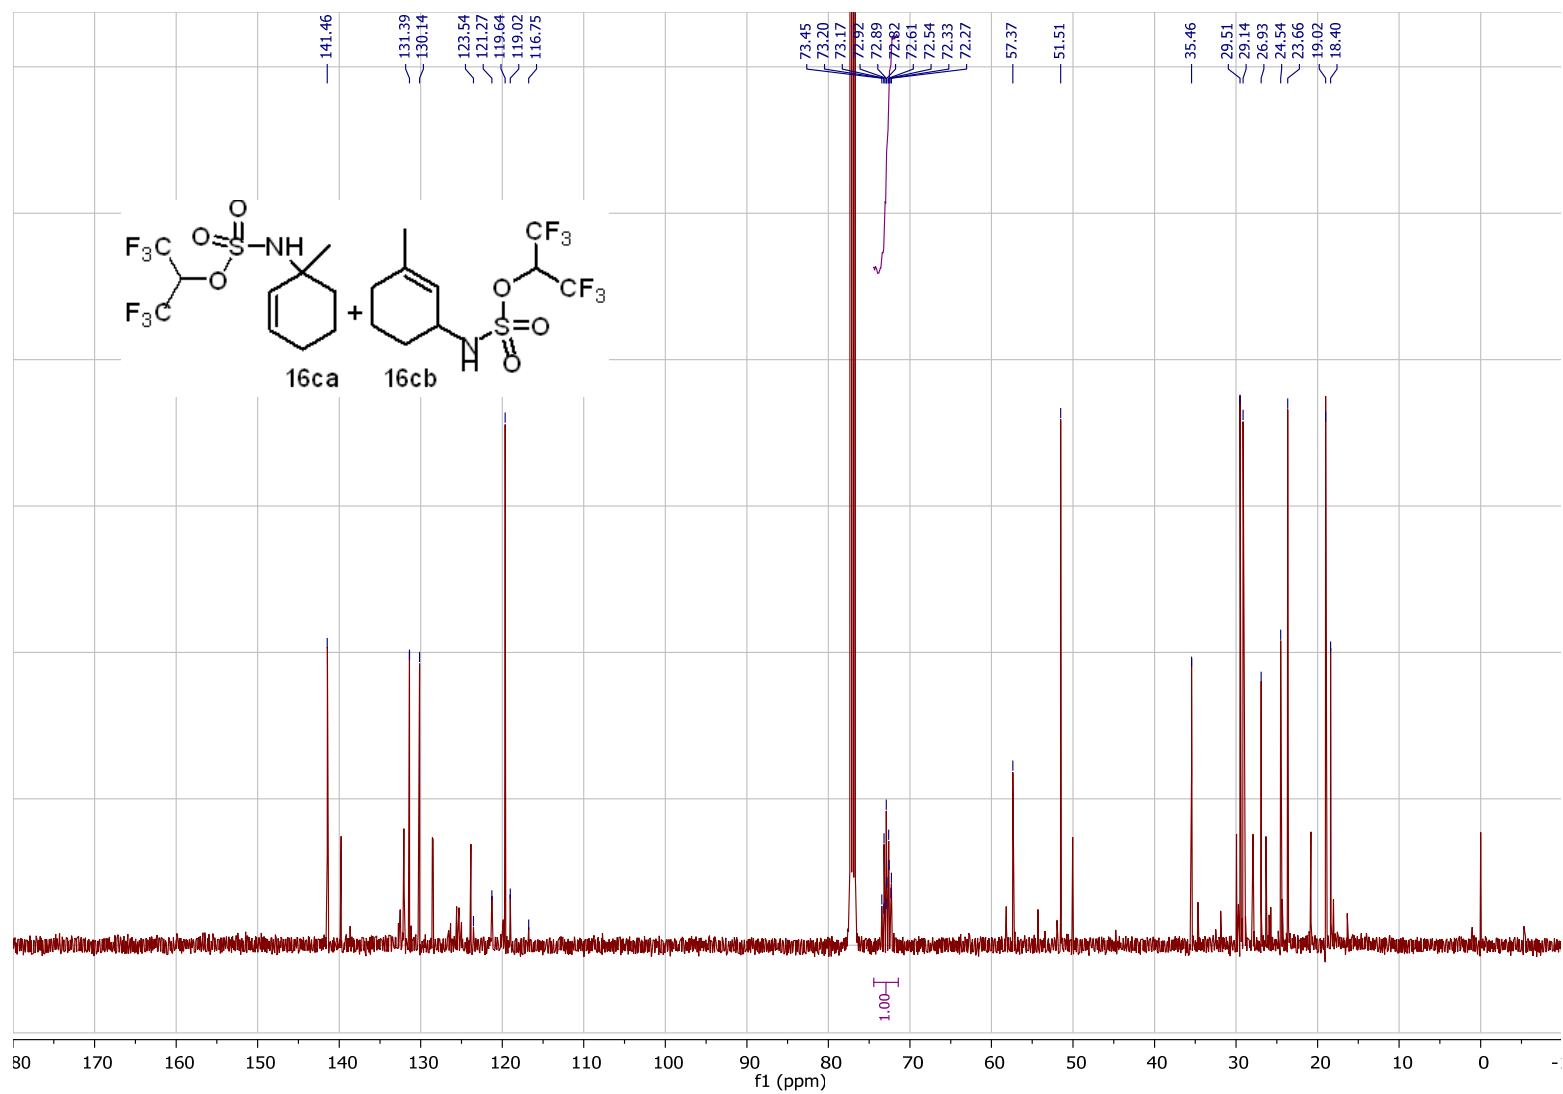



# Compound 16ca and 16cb-HSQC

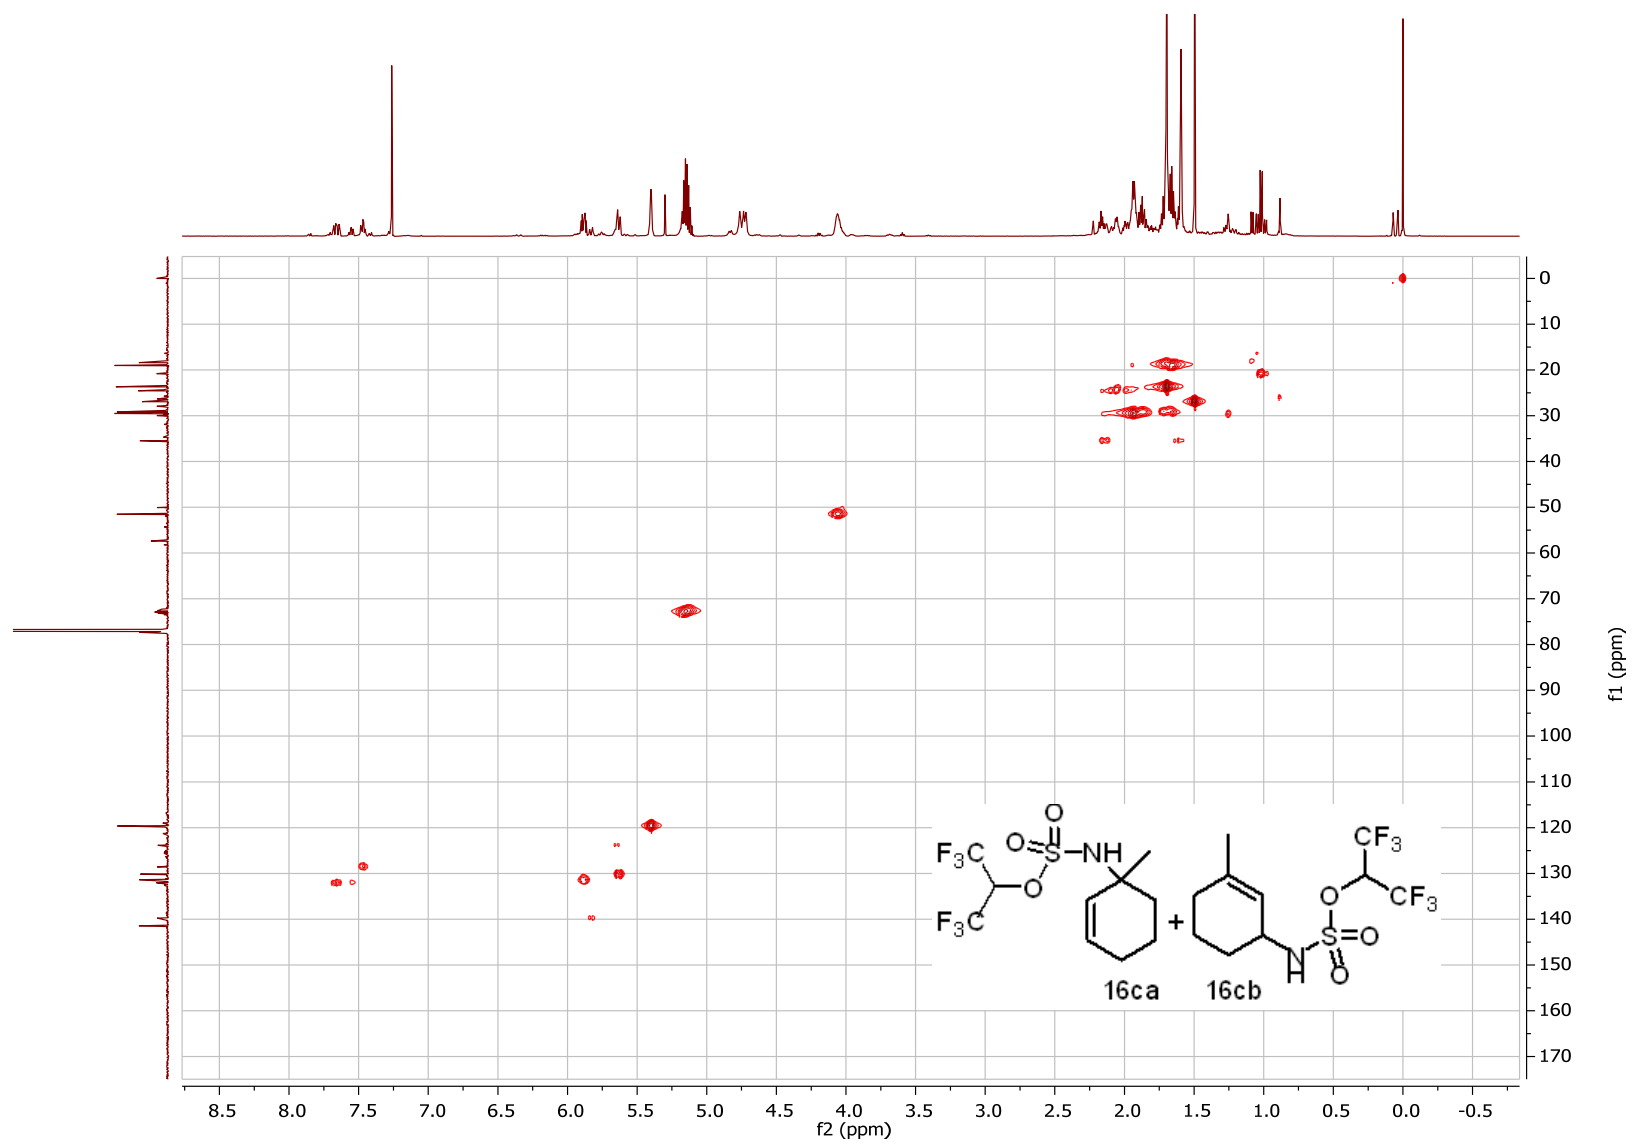

# Compound 16ca and 16cb-HMBC

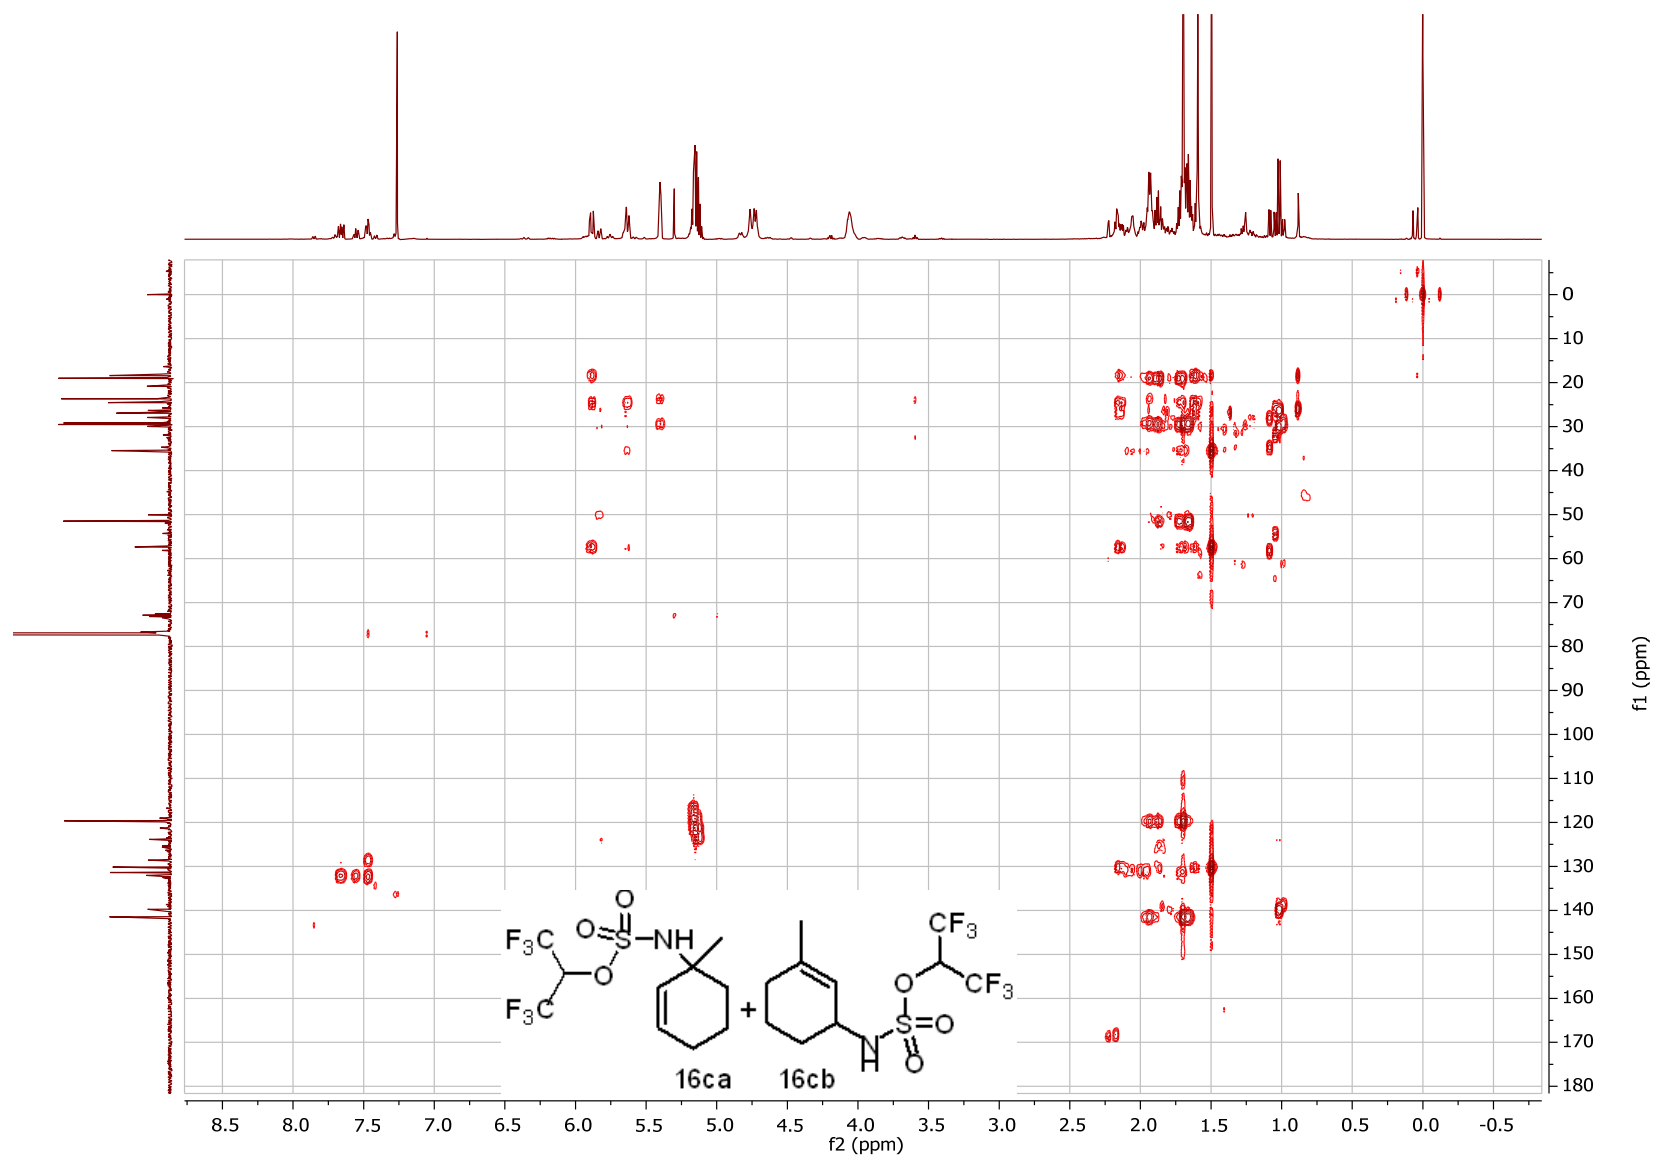

# Compounds 16da, 16db, 16dc

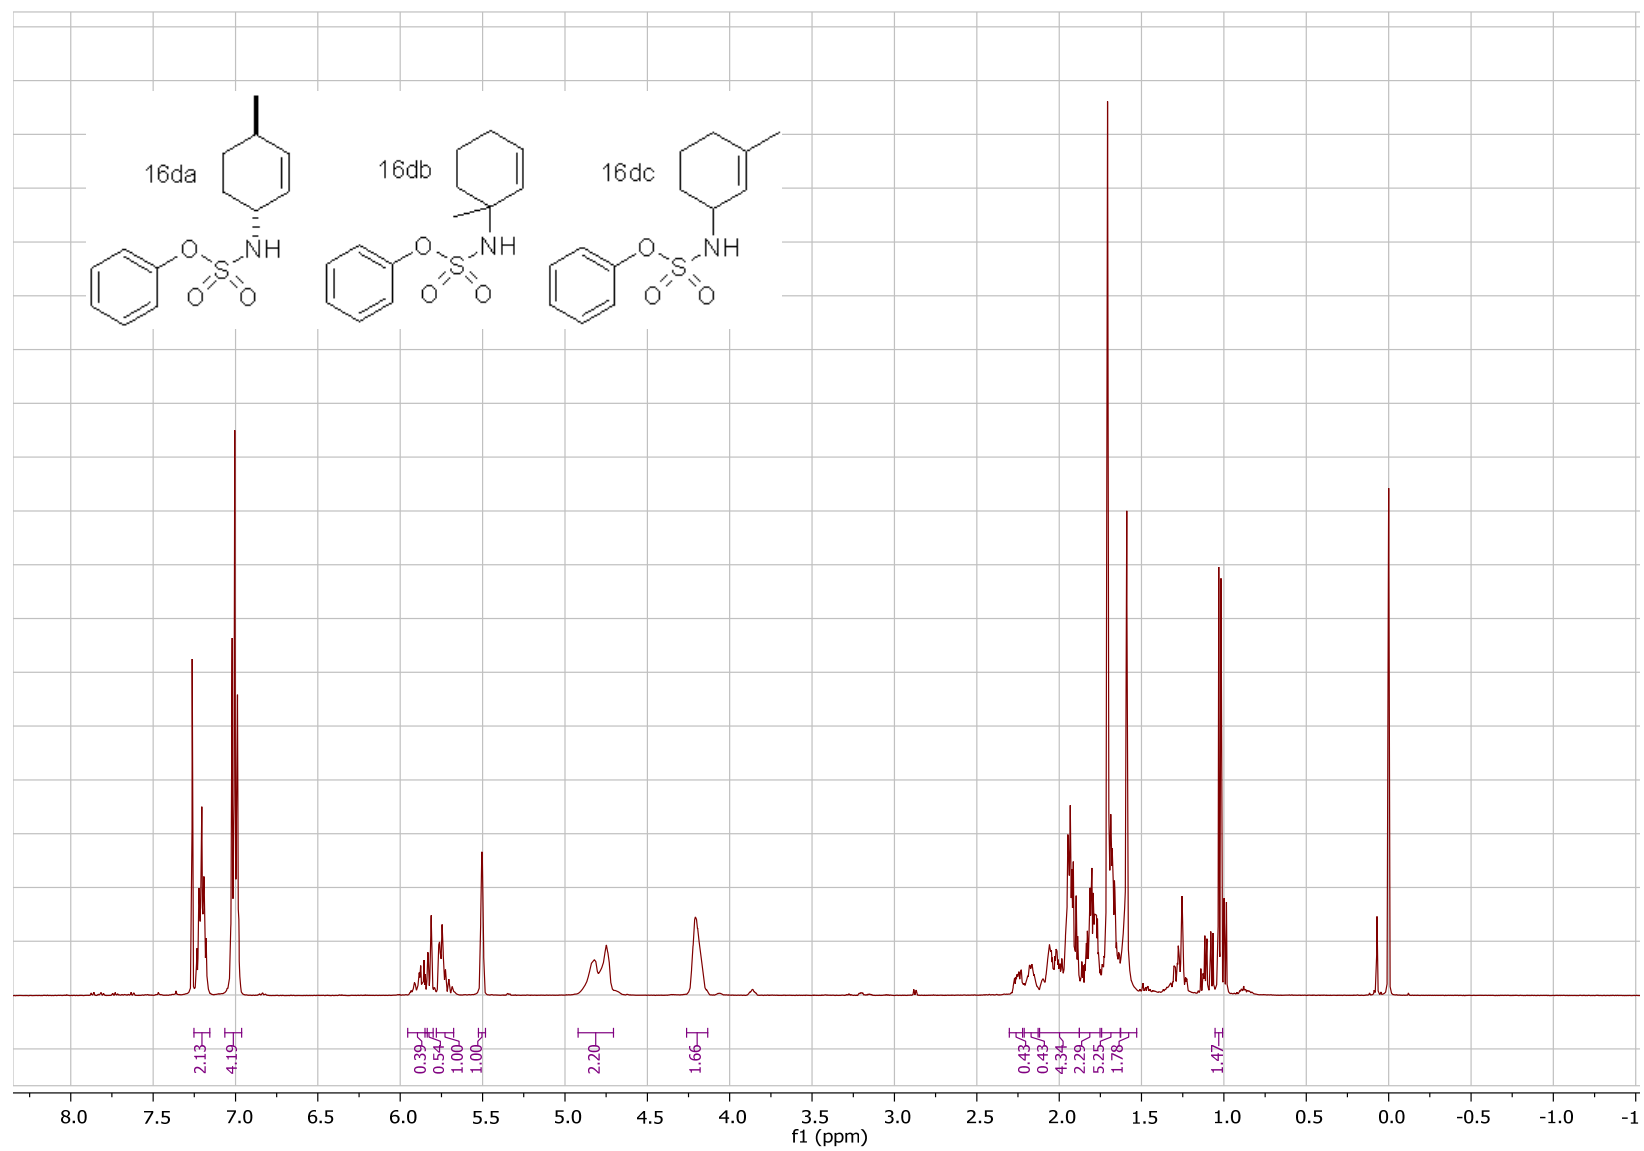

# Compounds 16da, 16db, 16dc

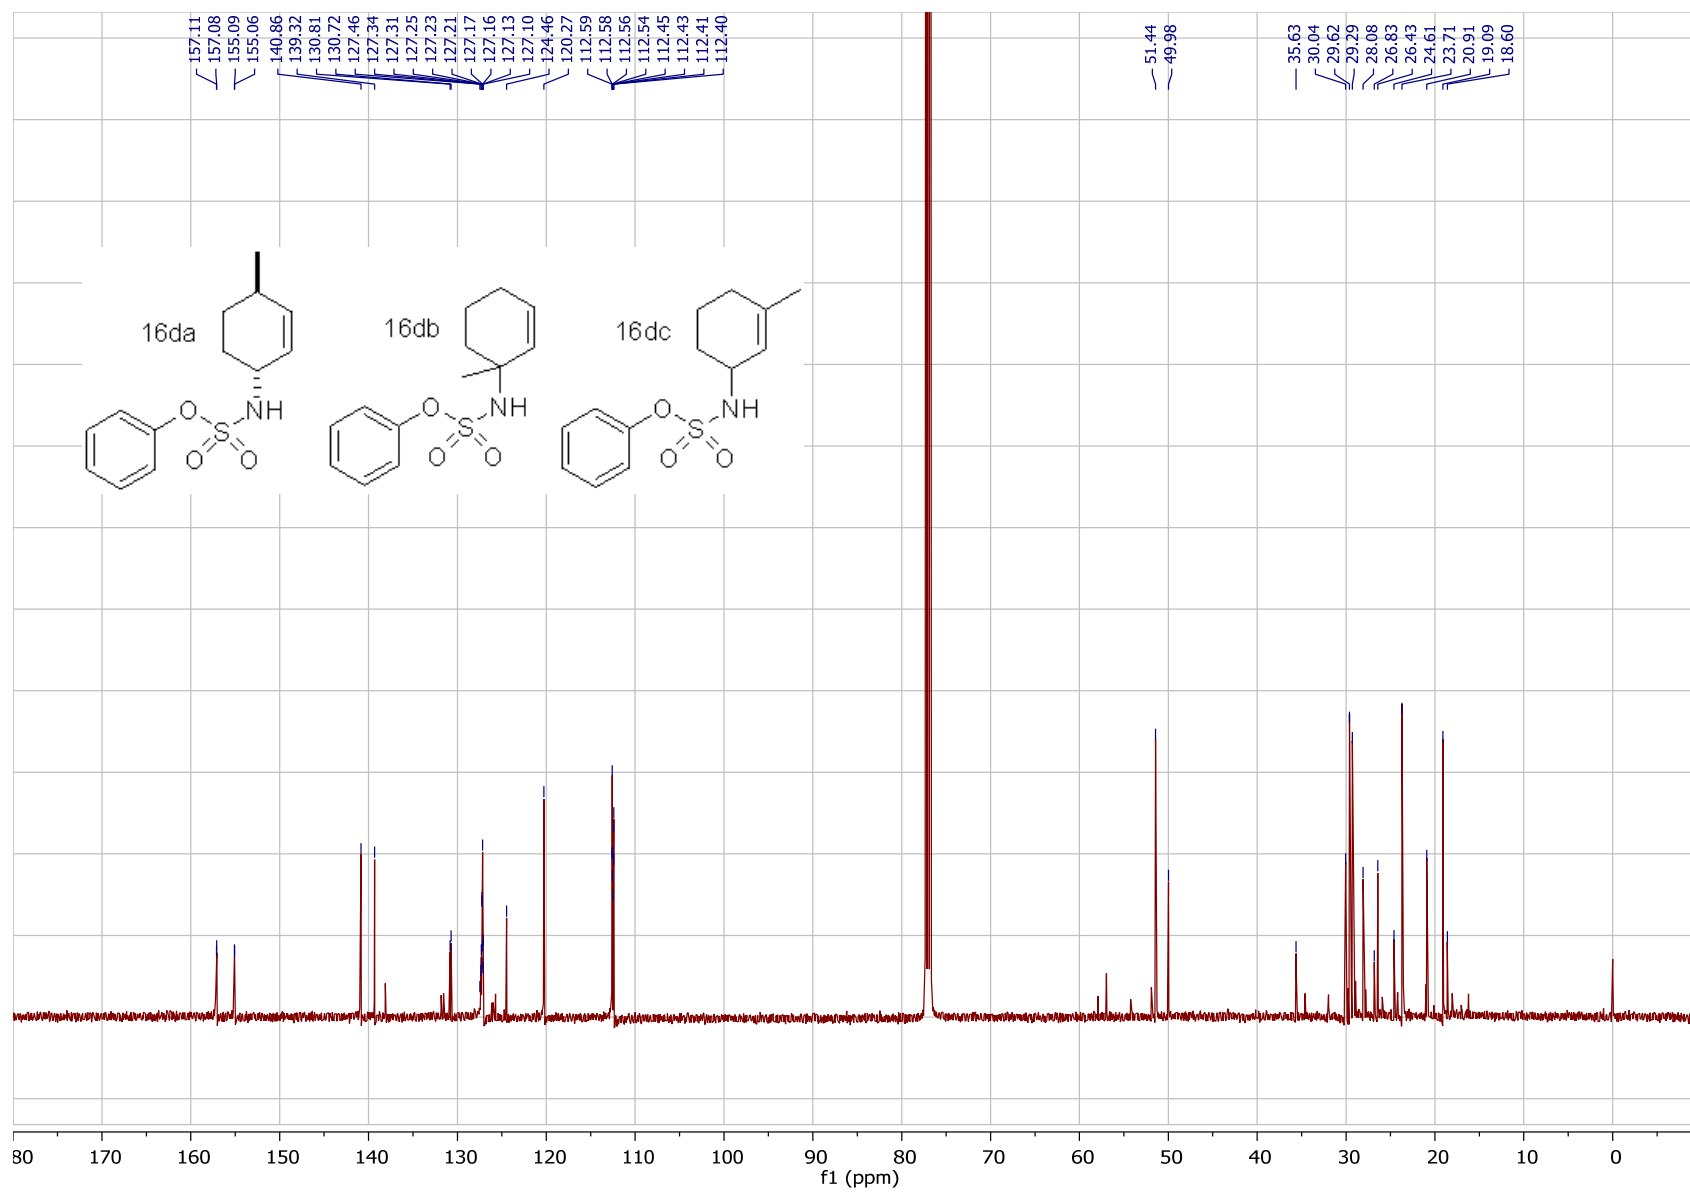

# Compounds 16da, 16db, 16dc-HSQC

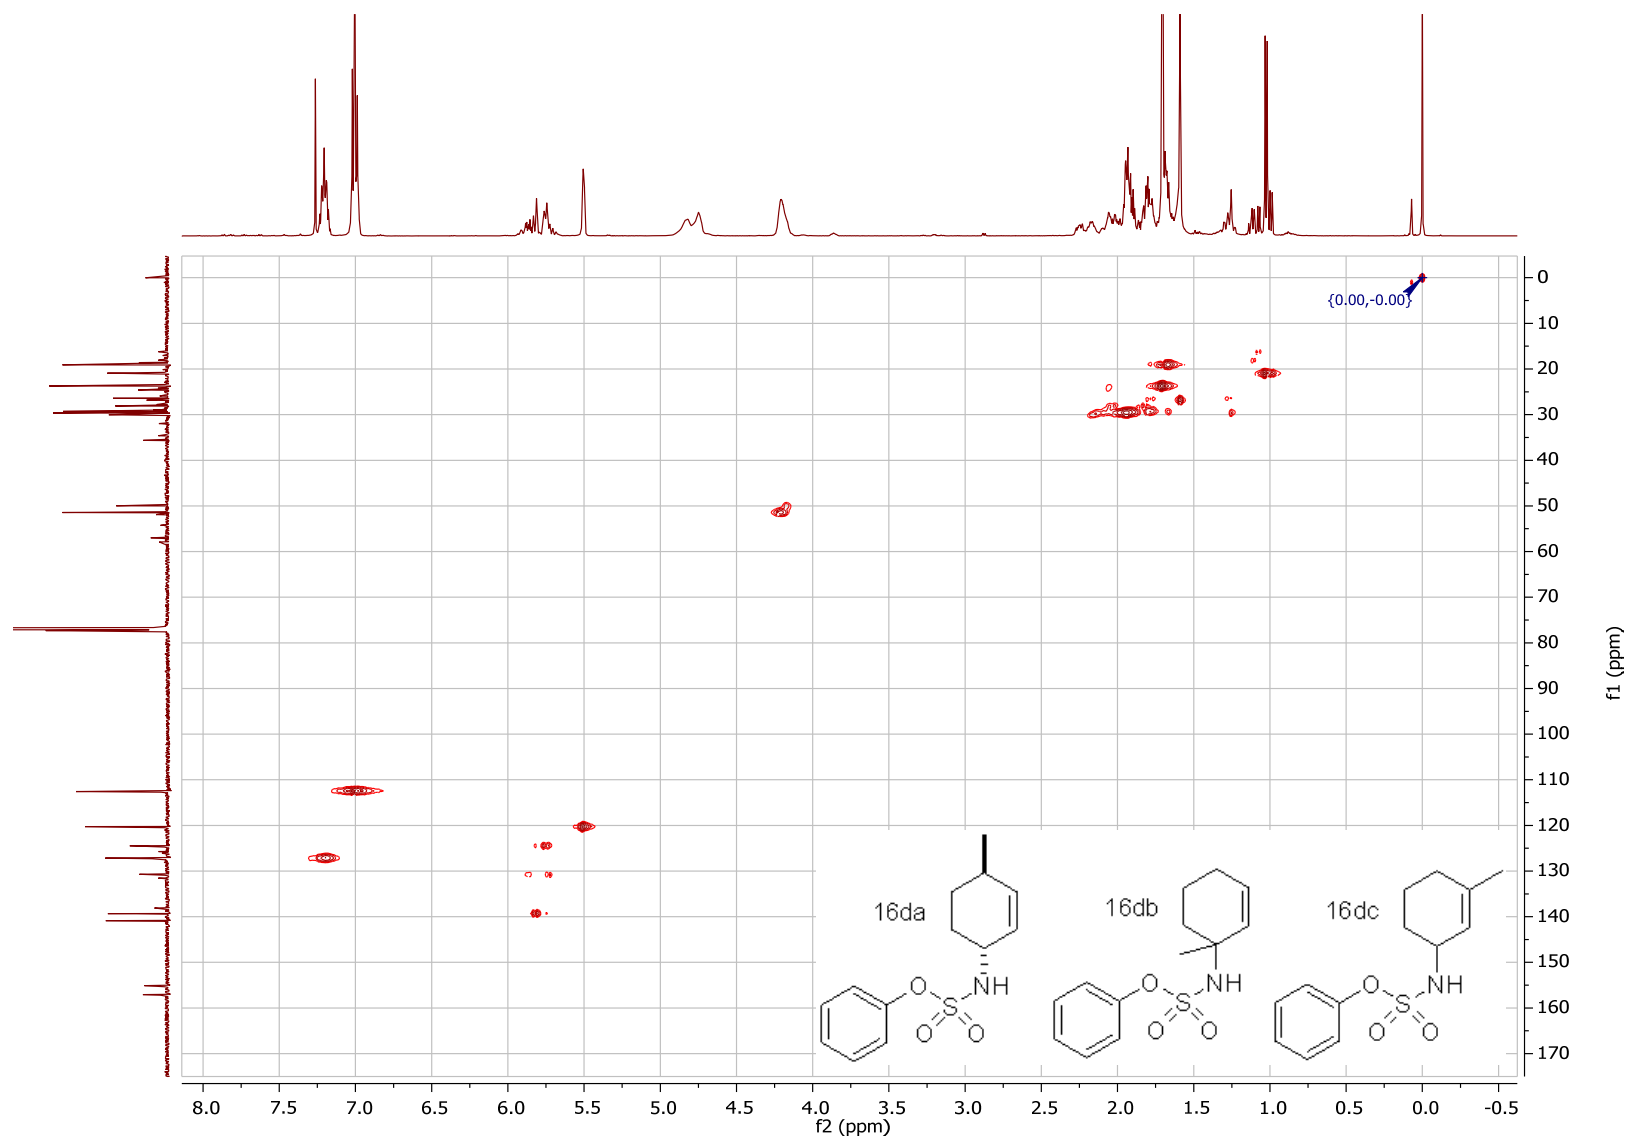

# Compounds 16da, 16db, 16dc-HMBC

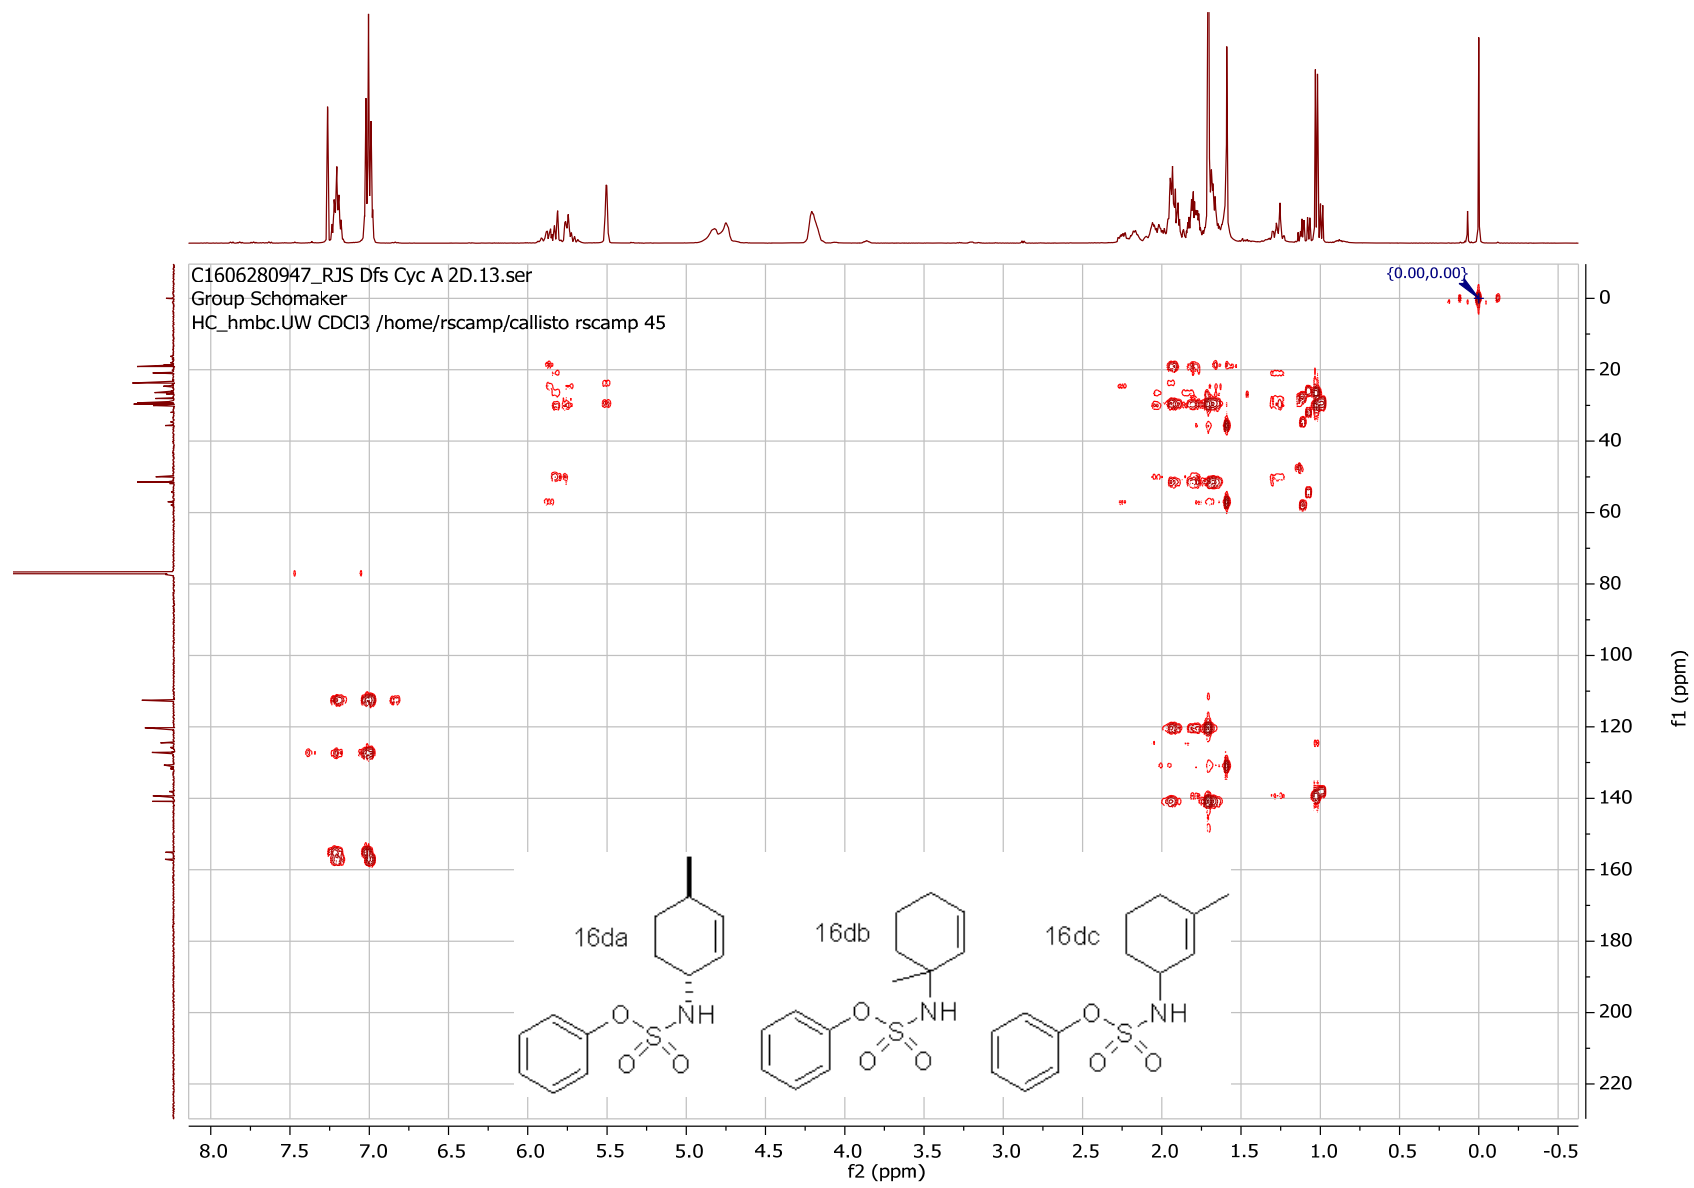

# Compound 17a

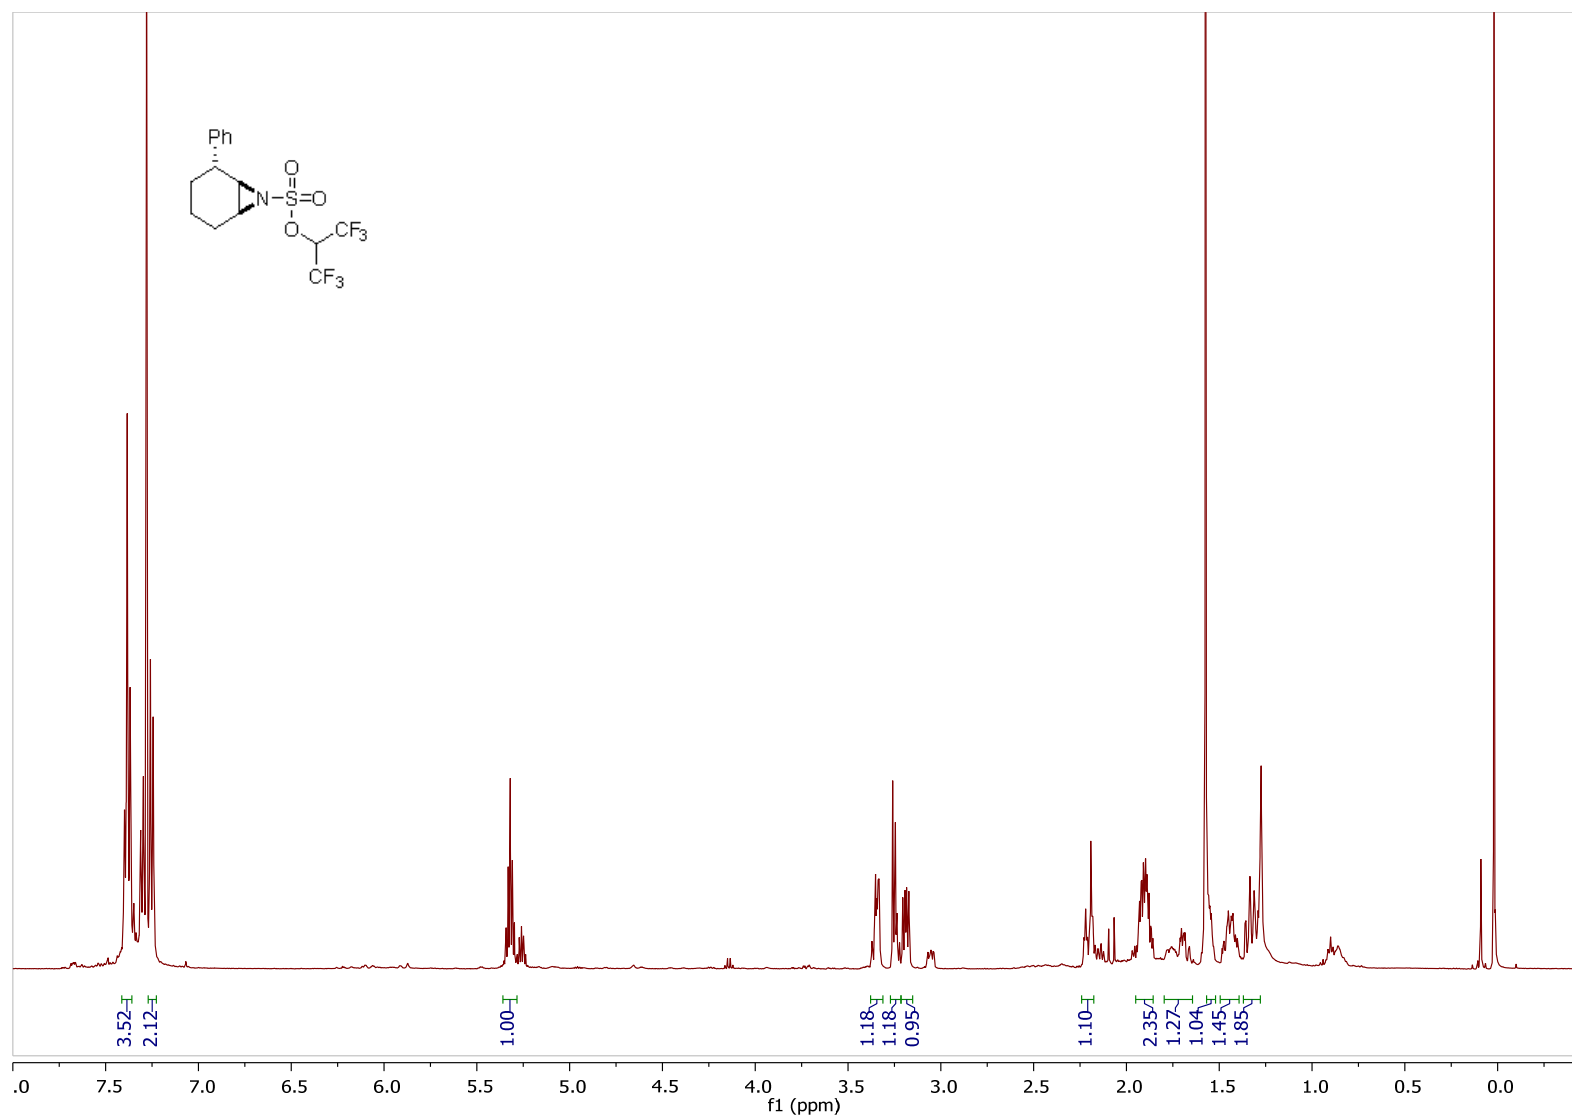

# Compound 17a

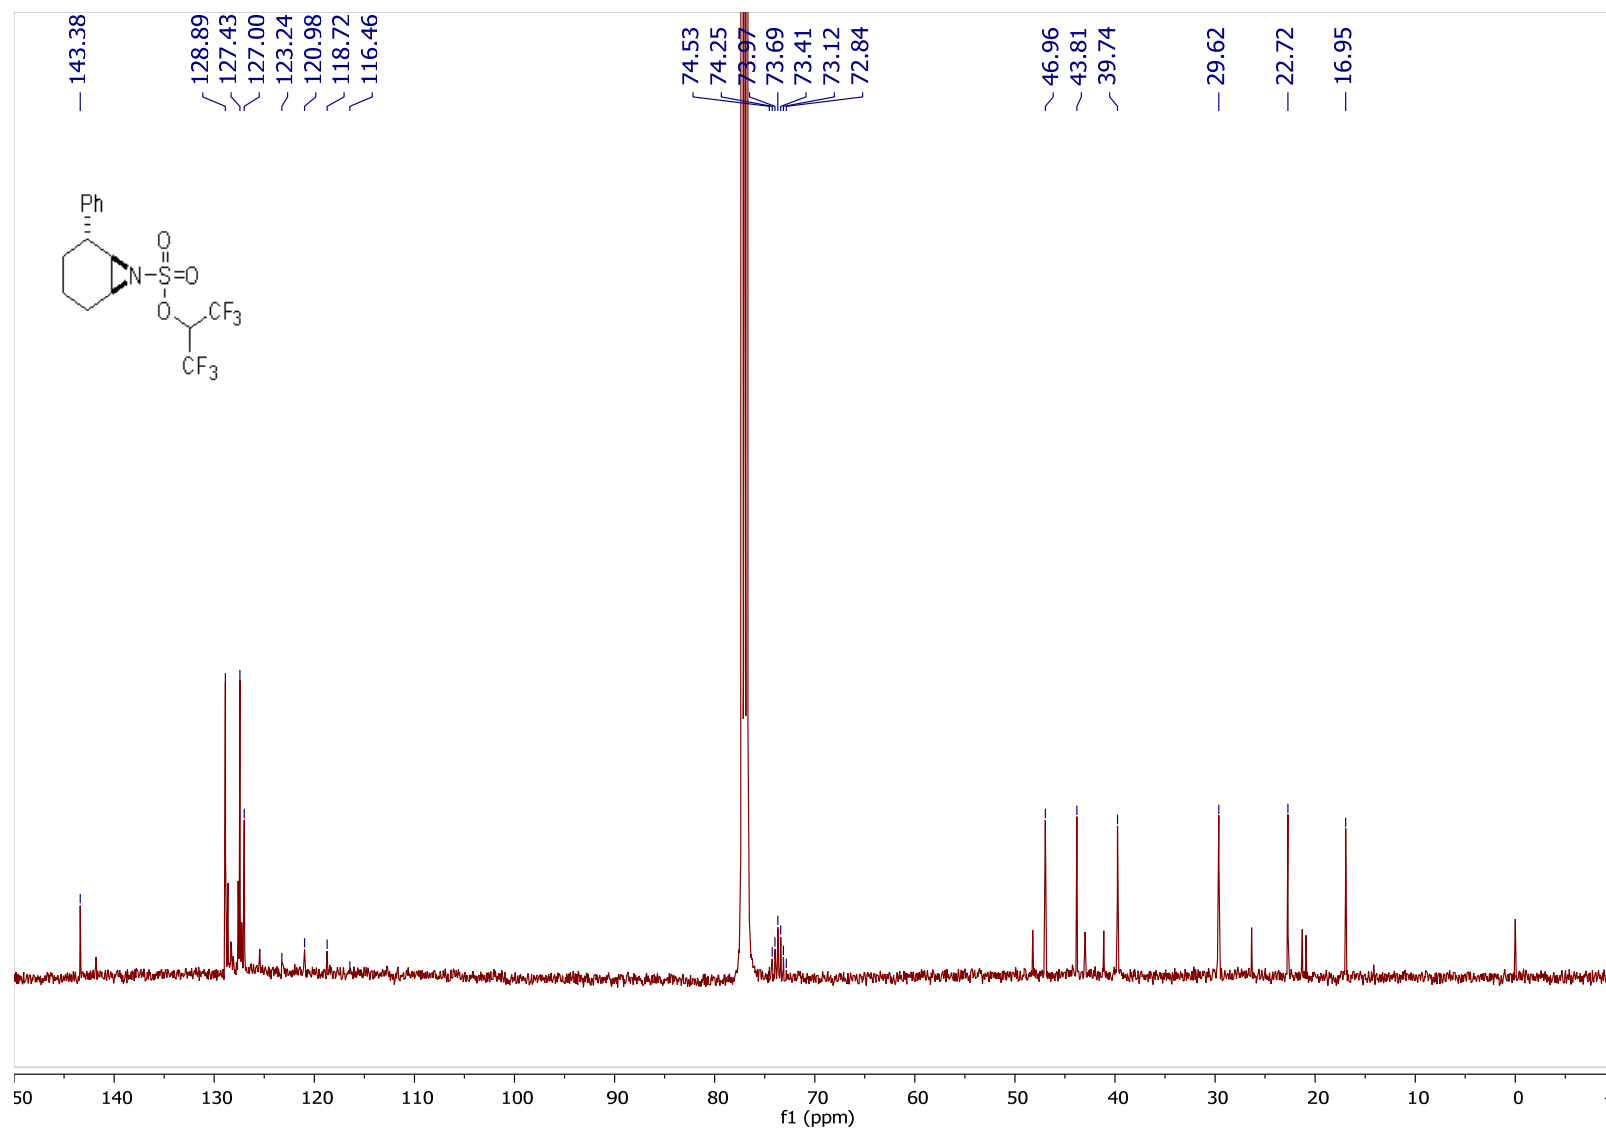



# Compound 18a.

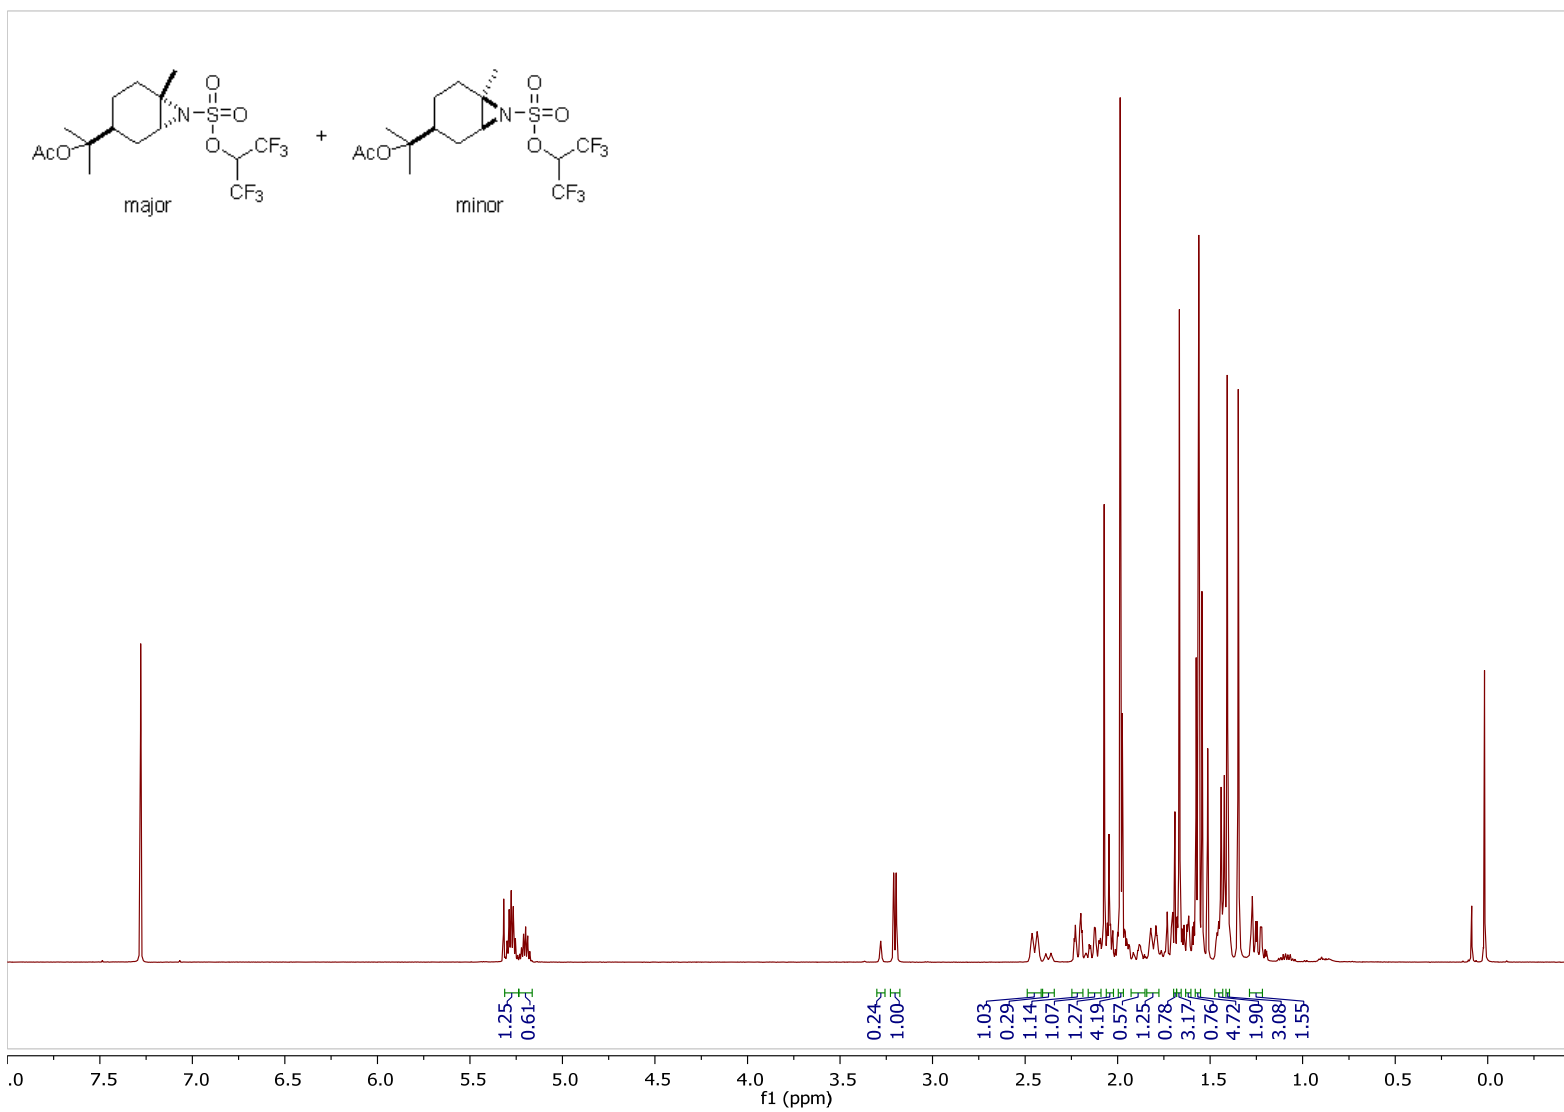

# Compound 18a.

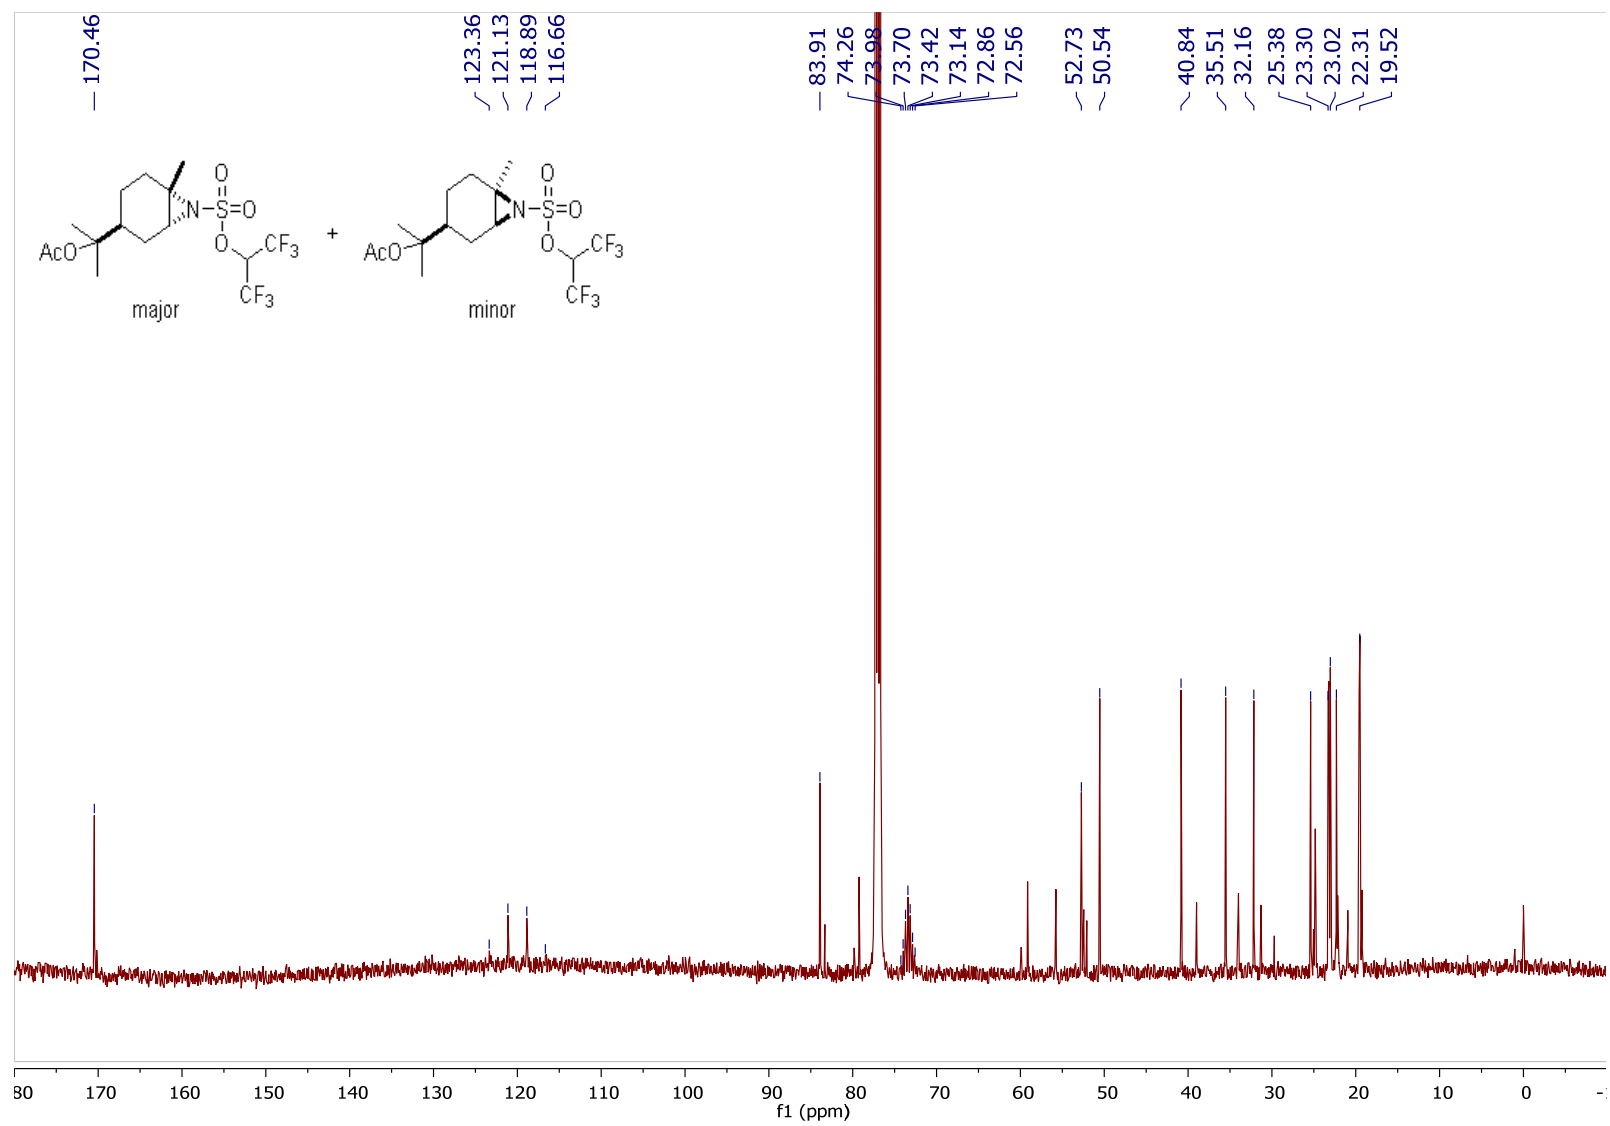

**Compound 18d.**

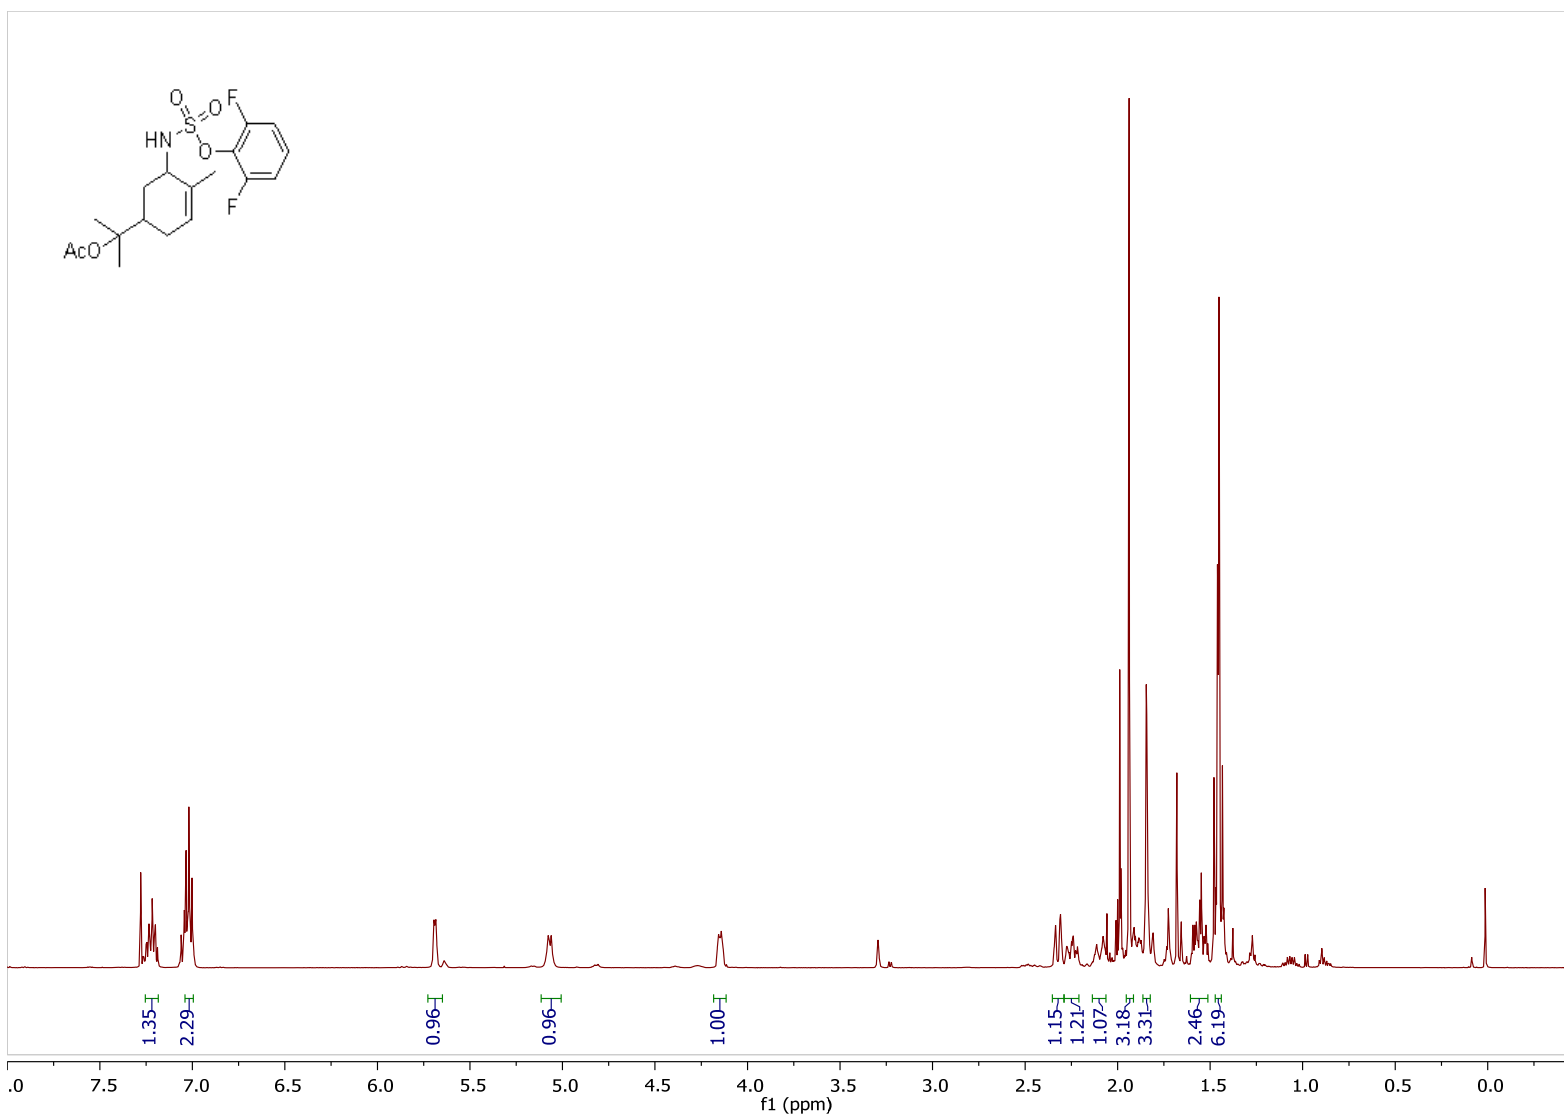

# Compound 18d.

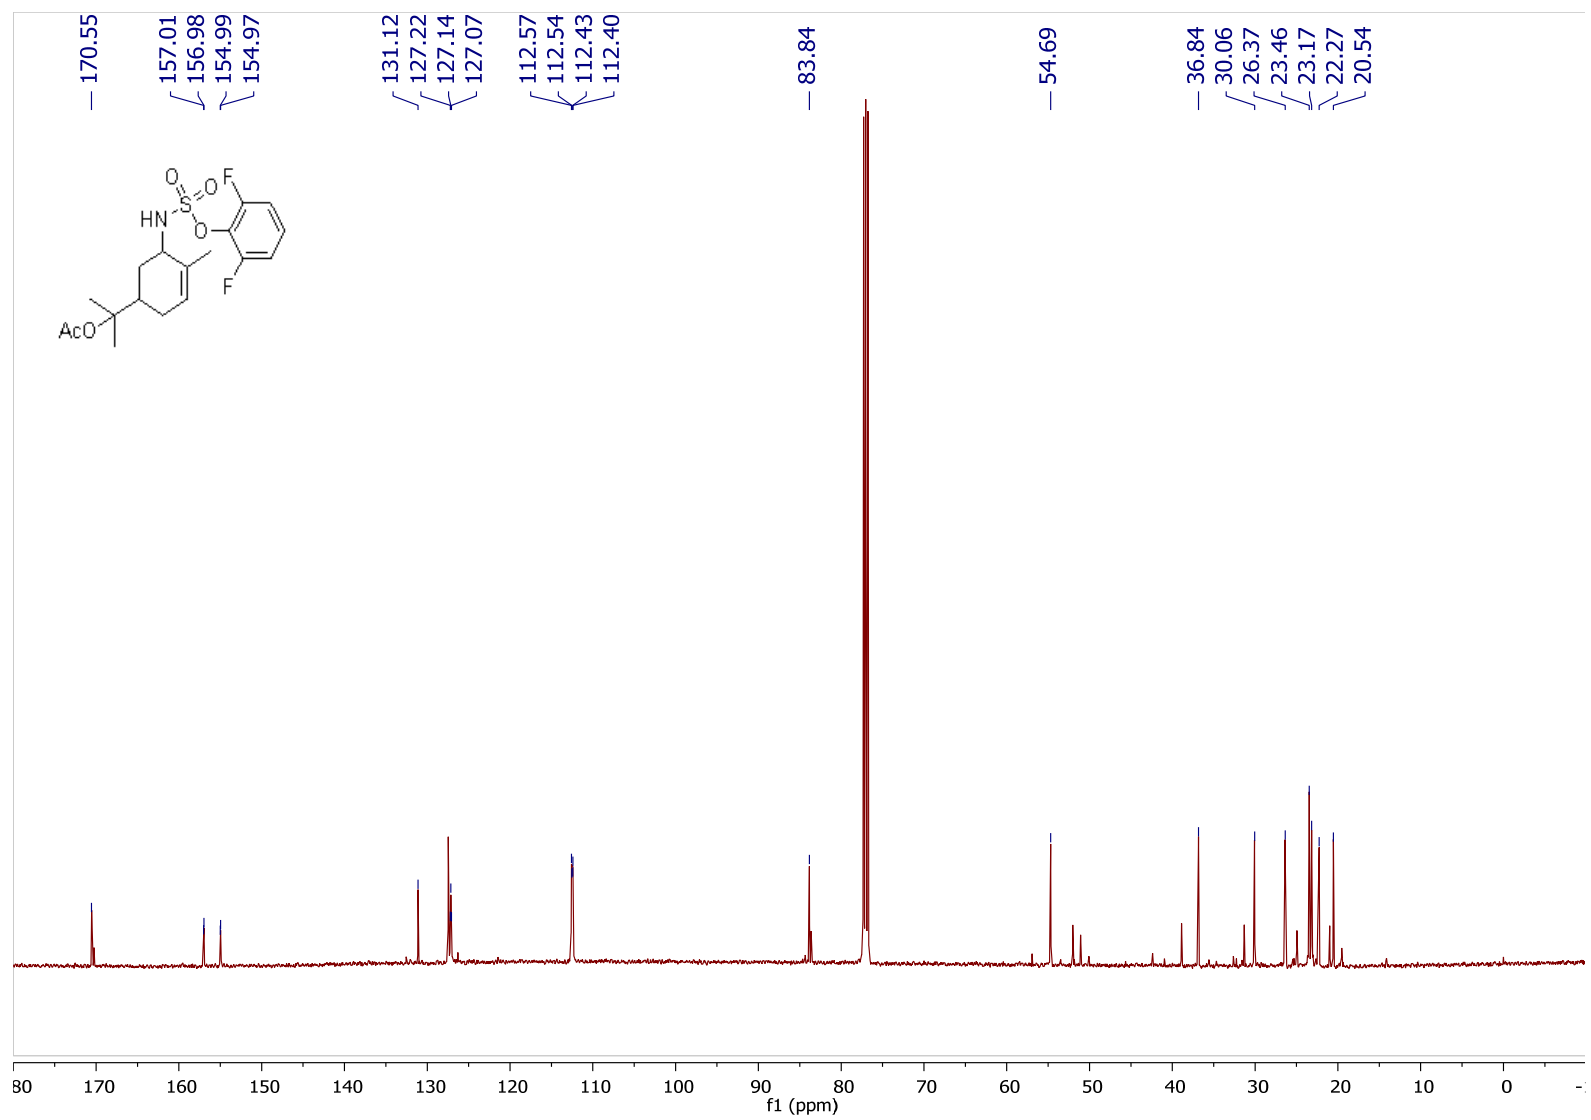

Compound *anti*-19a.

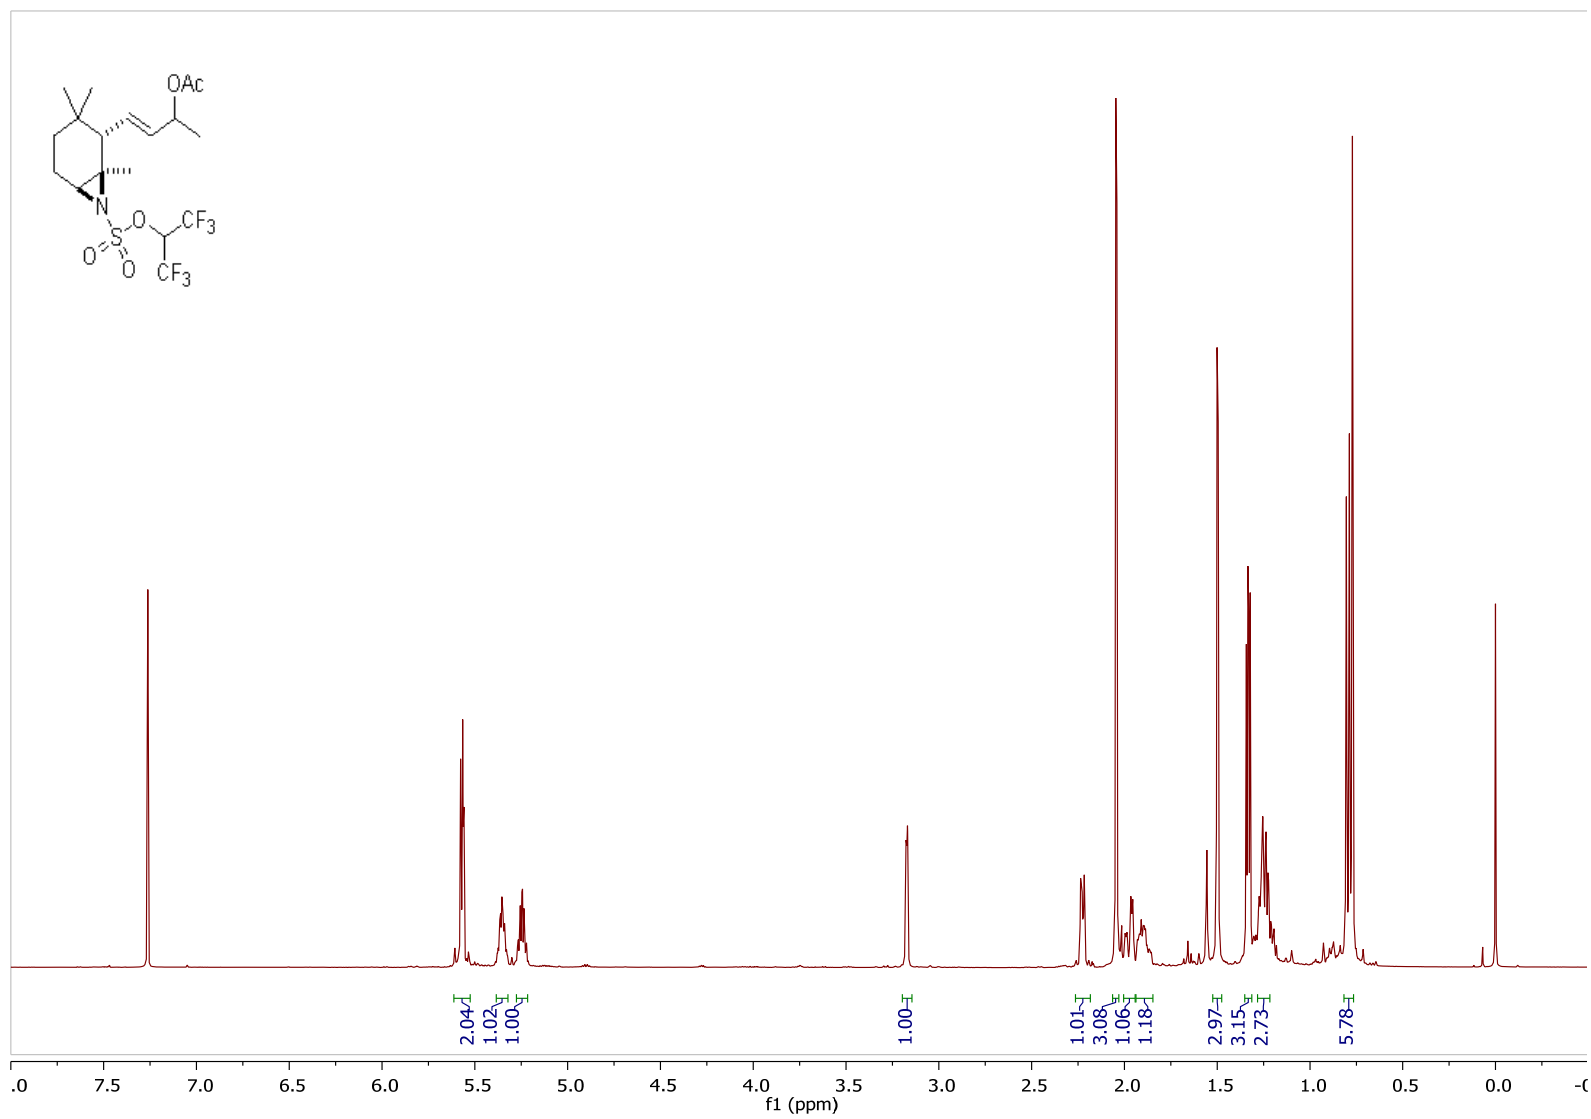

Compound *anti*-19a.

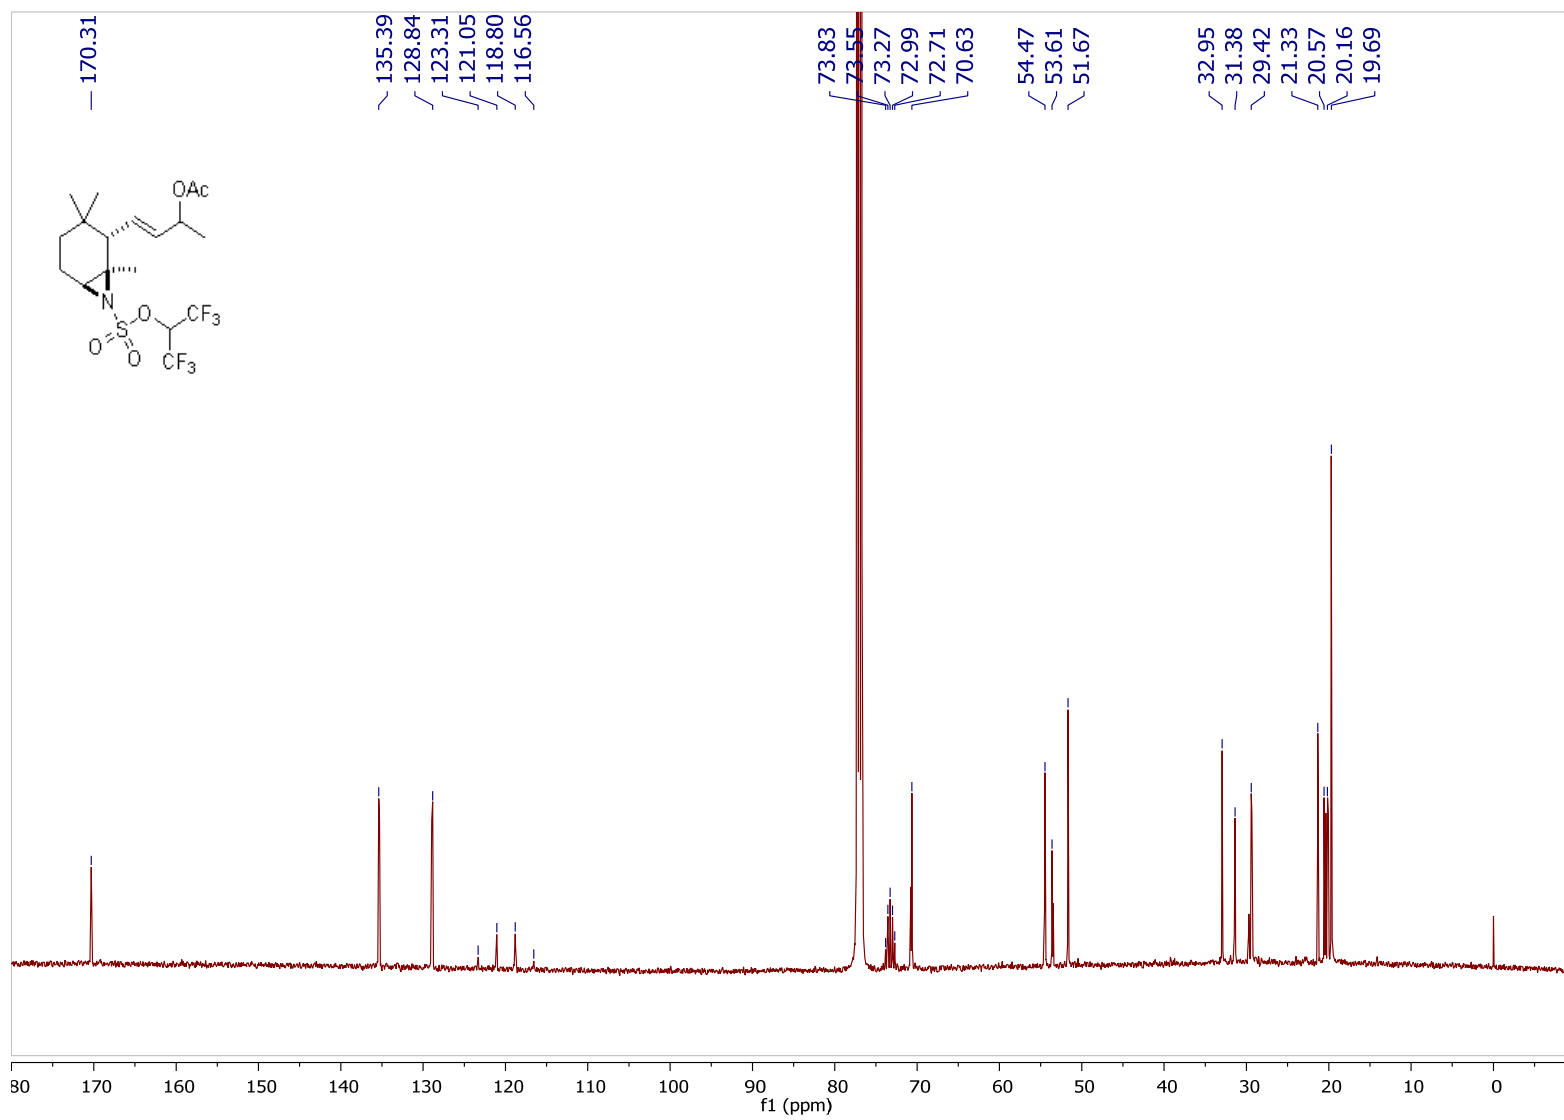

Compound *syn-19a*.

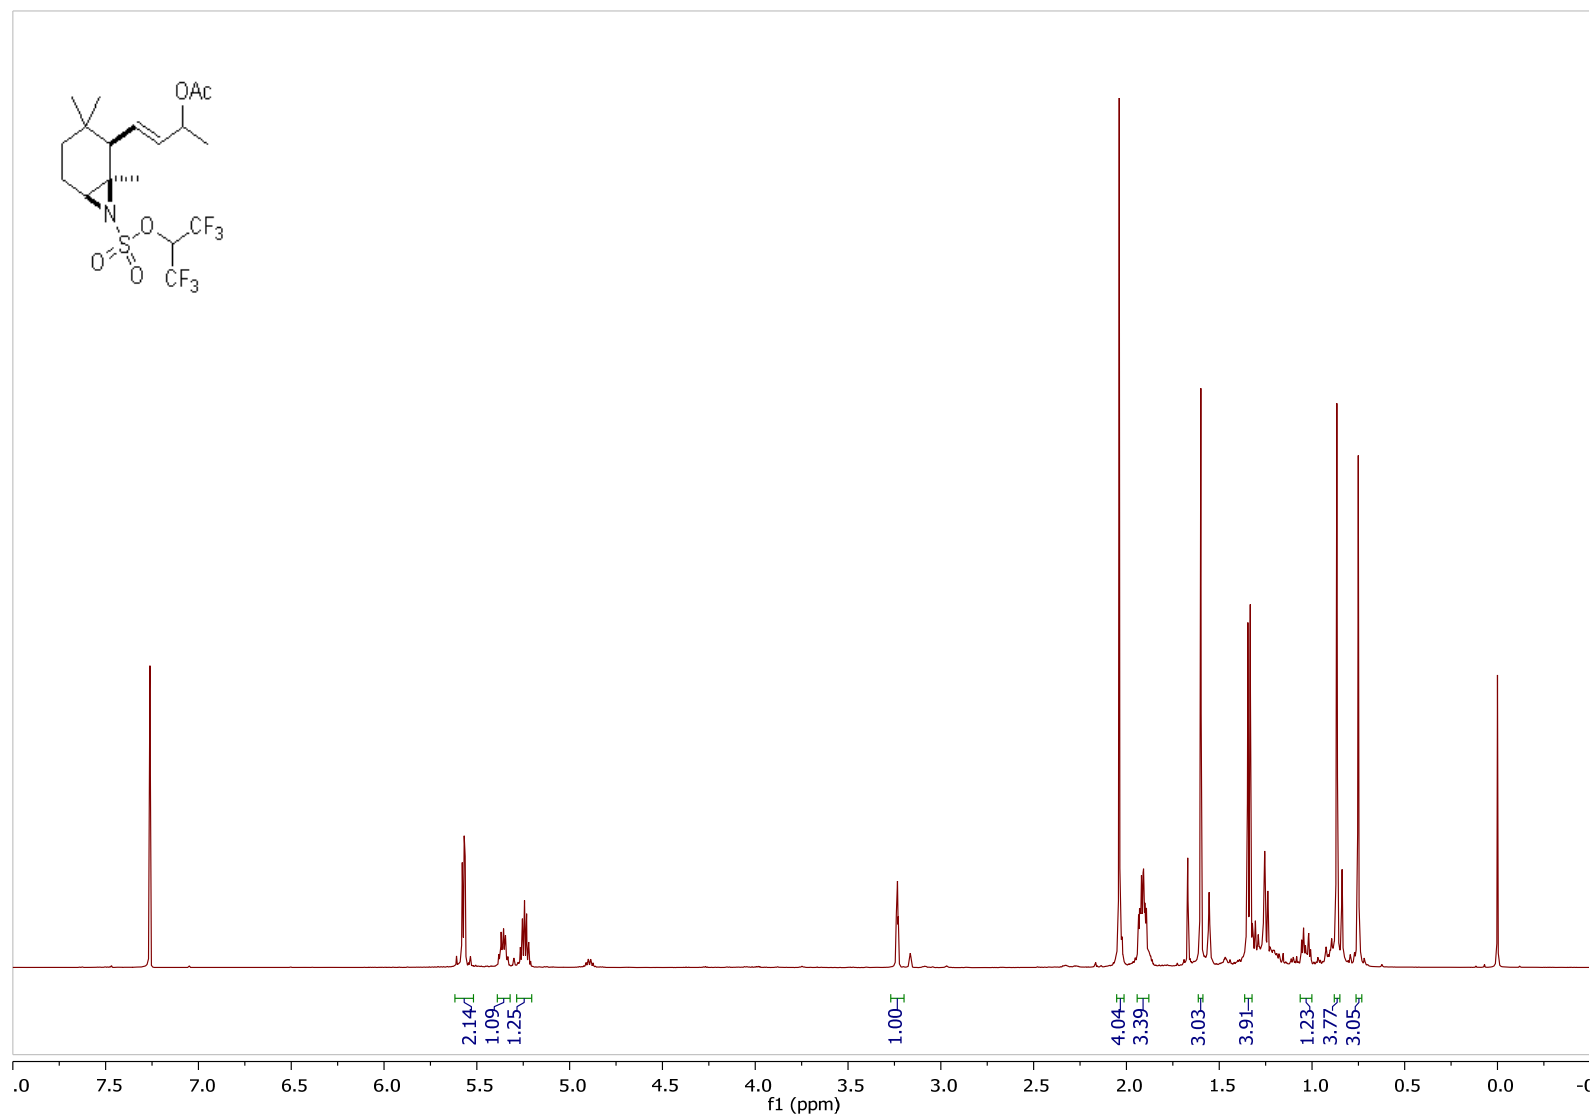

Compound *syn-19a*.

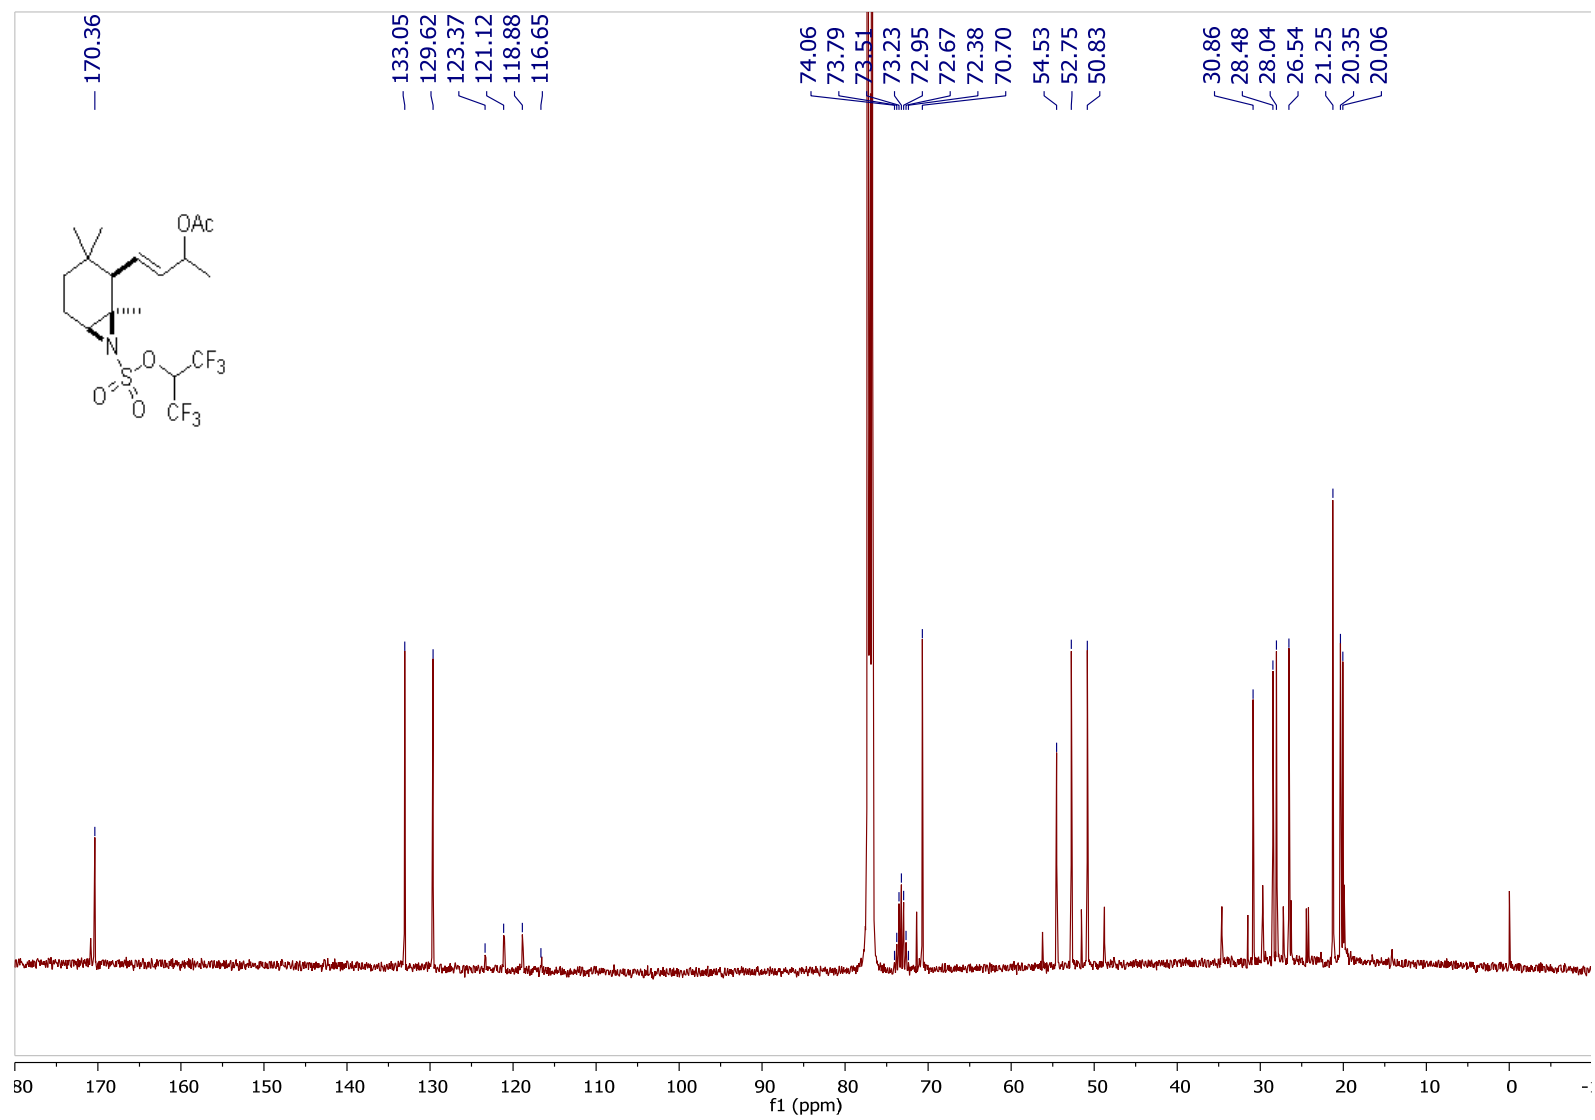



# Compound 19d.

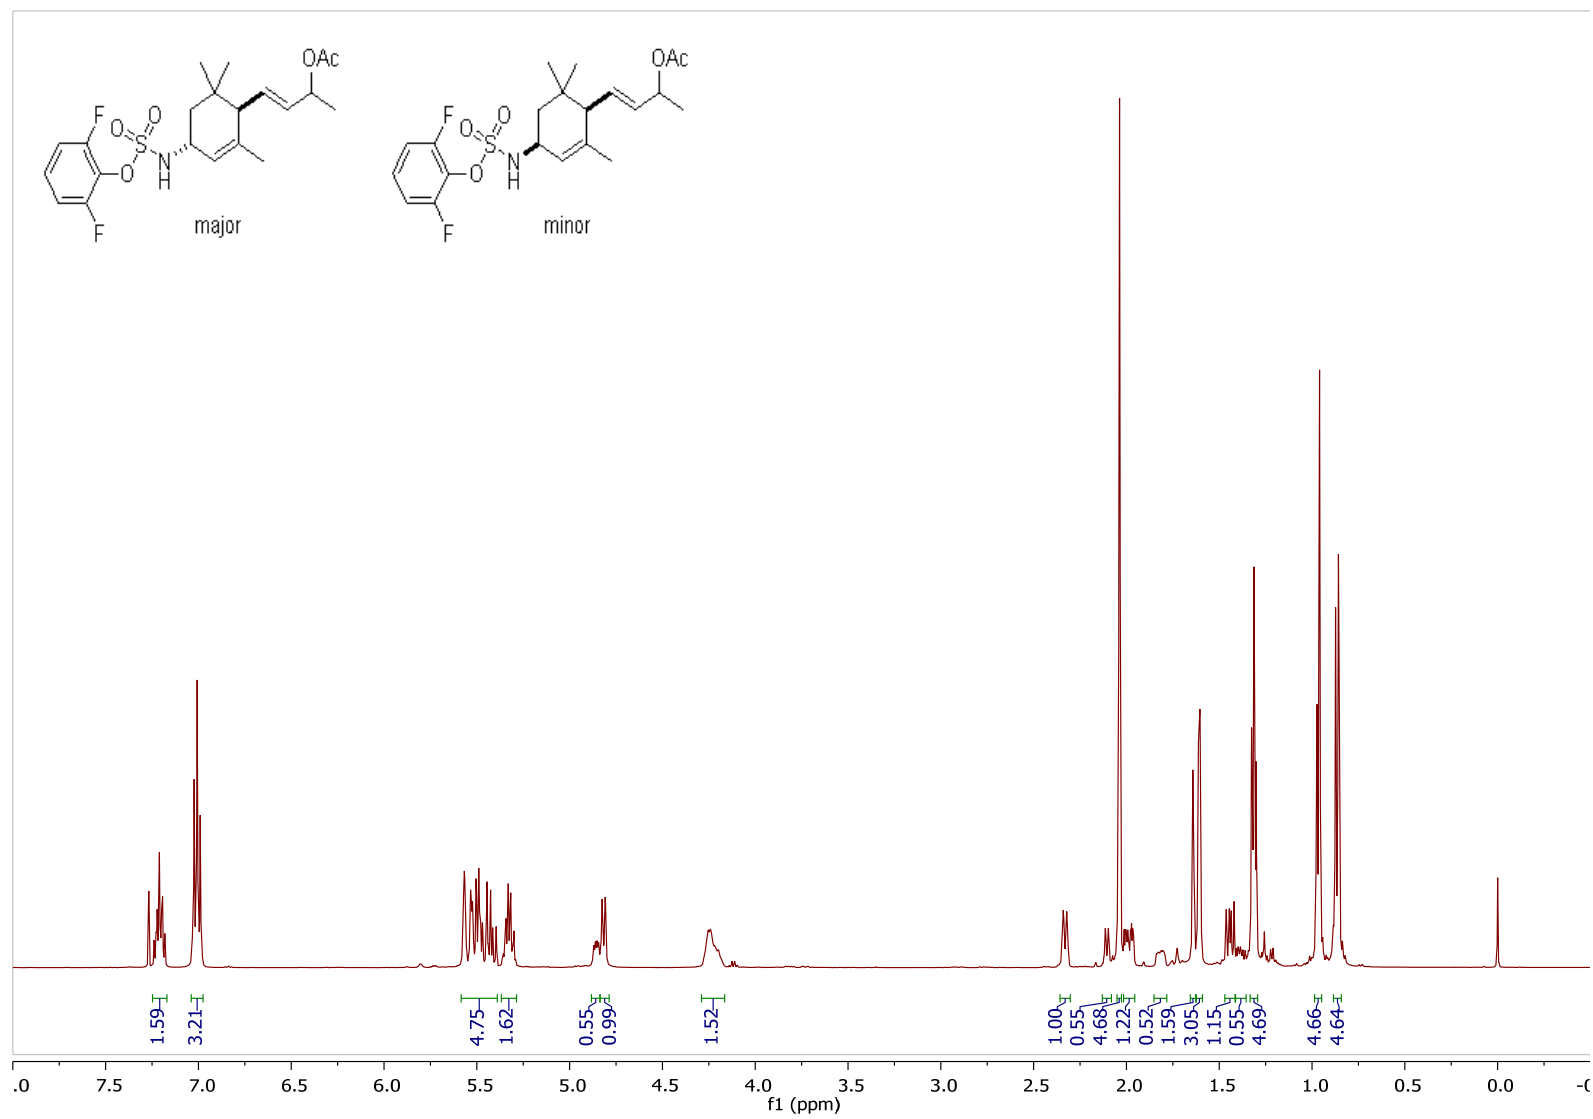

# Compound 19d.

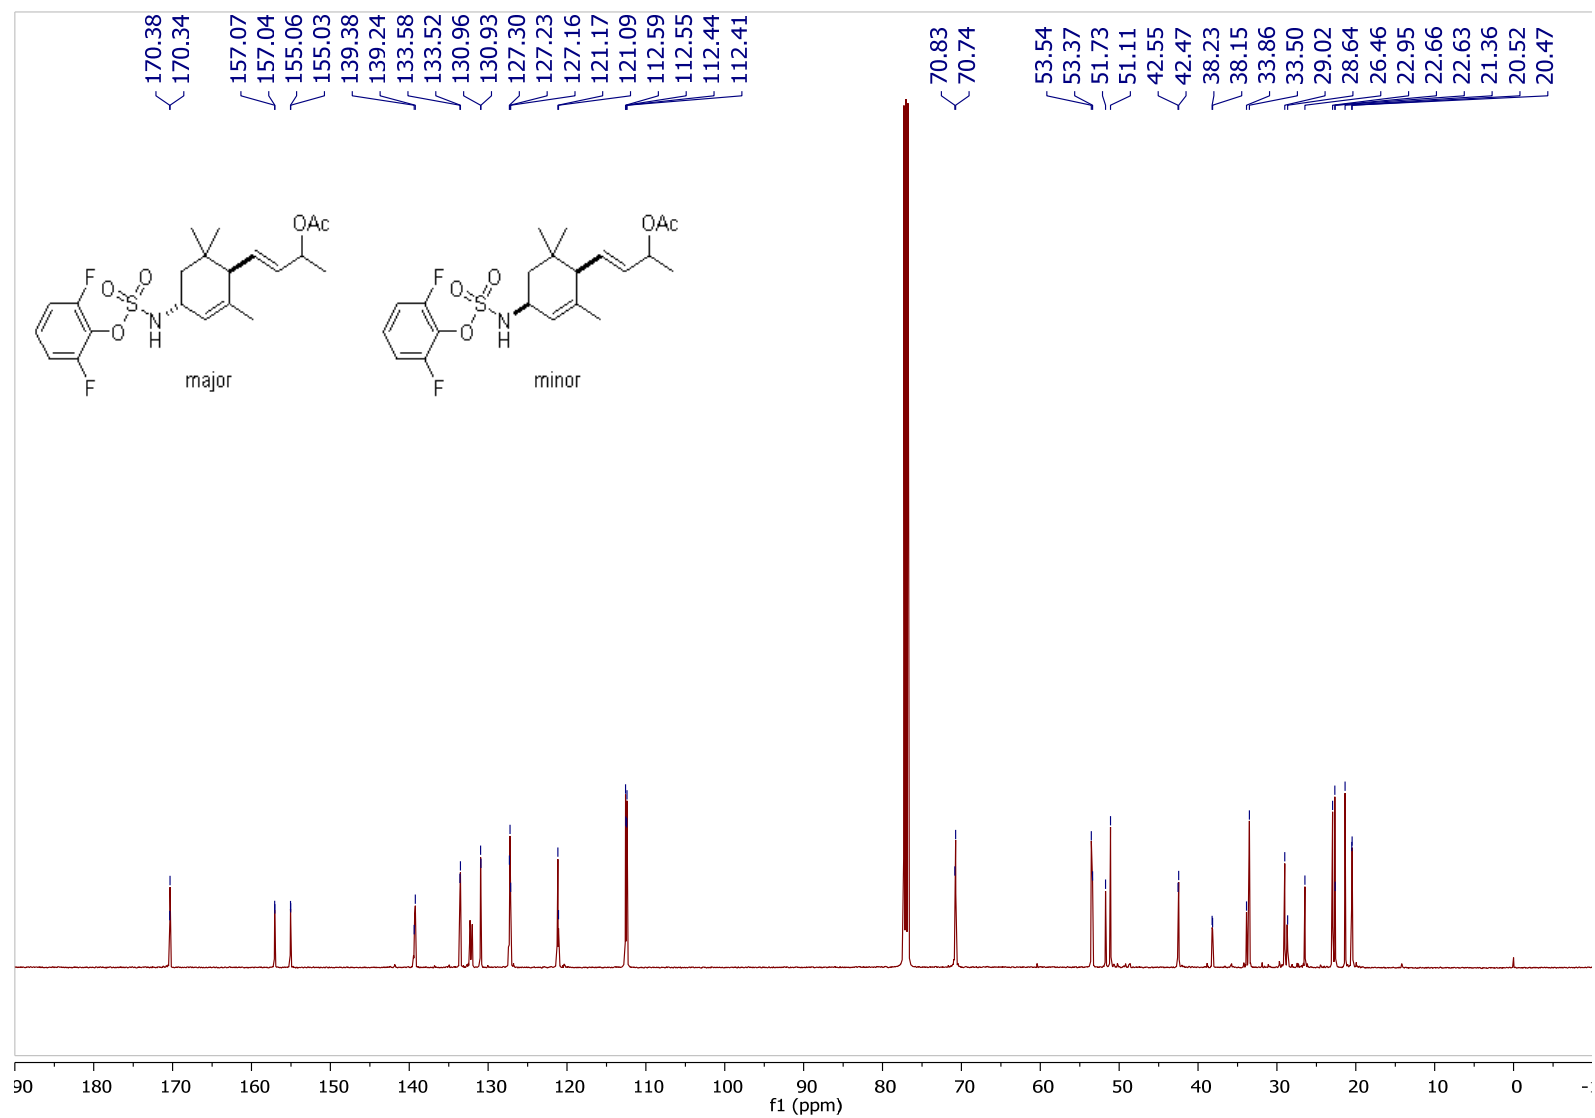

Compound 20aa and 20ab.

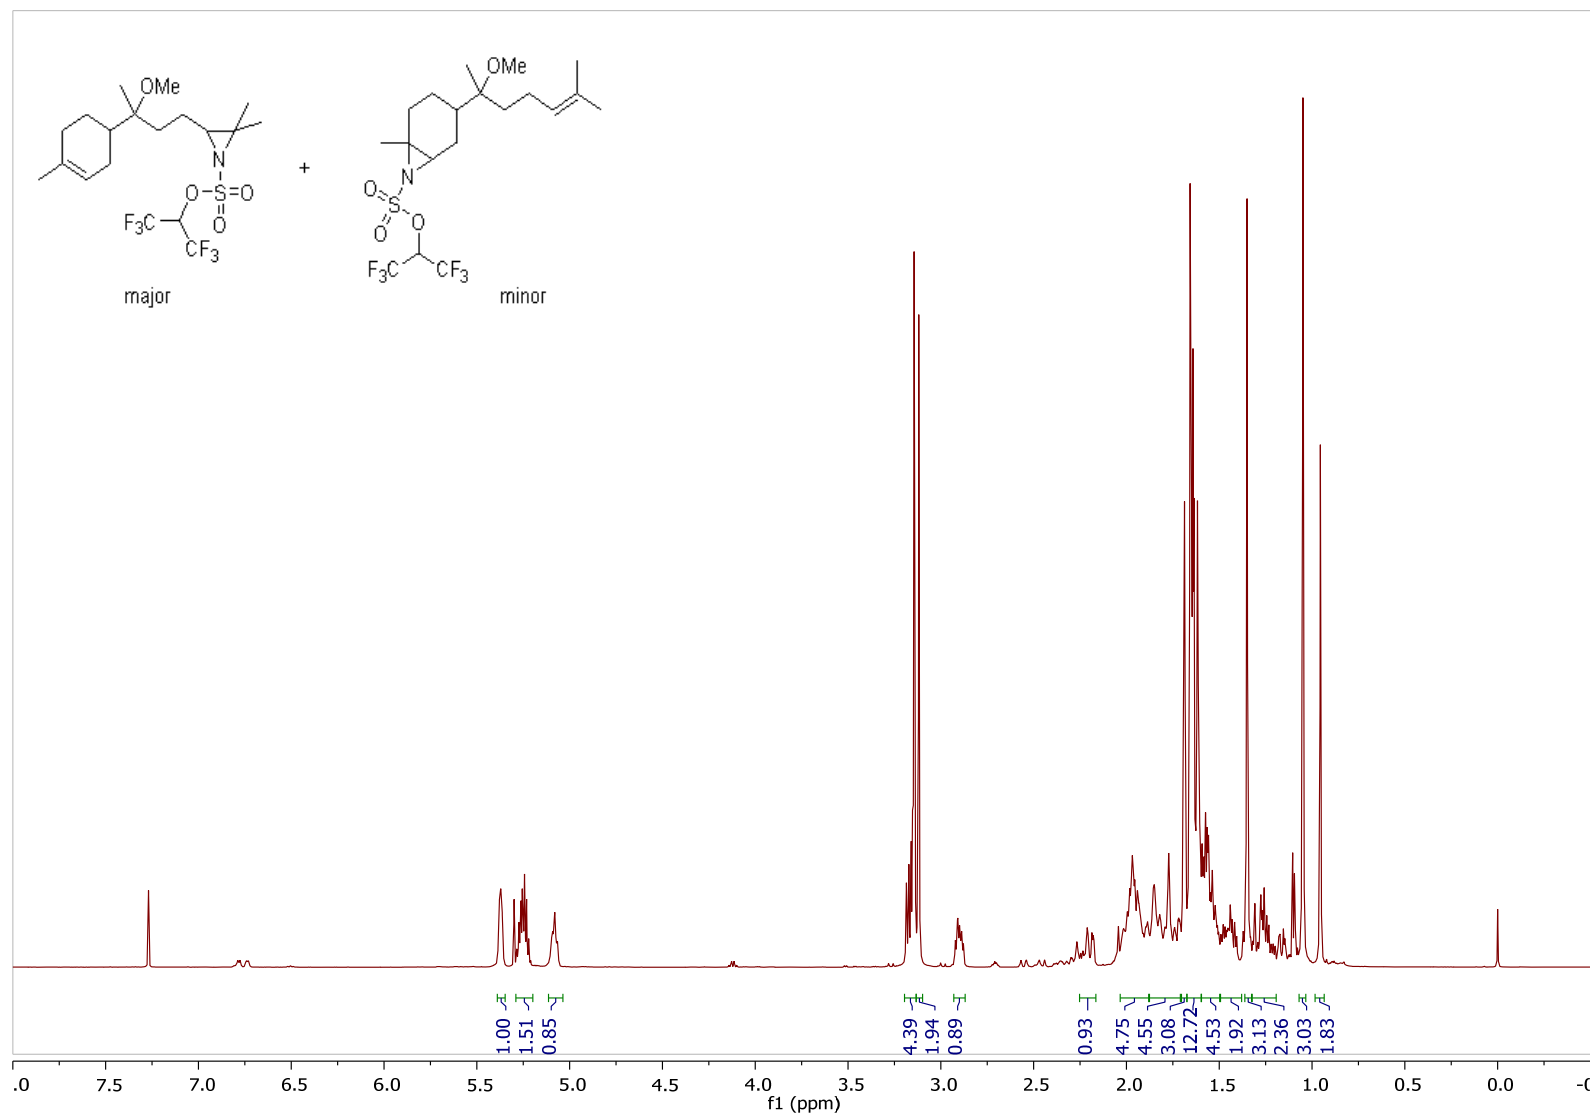

# Compound 20aa and 20ab.

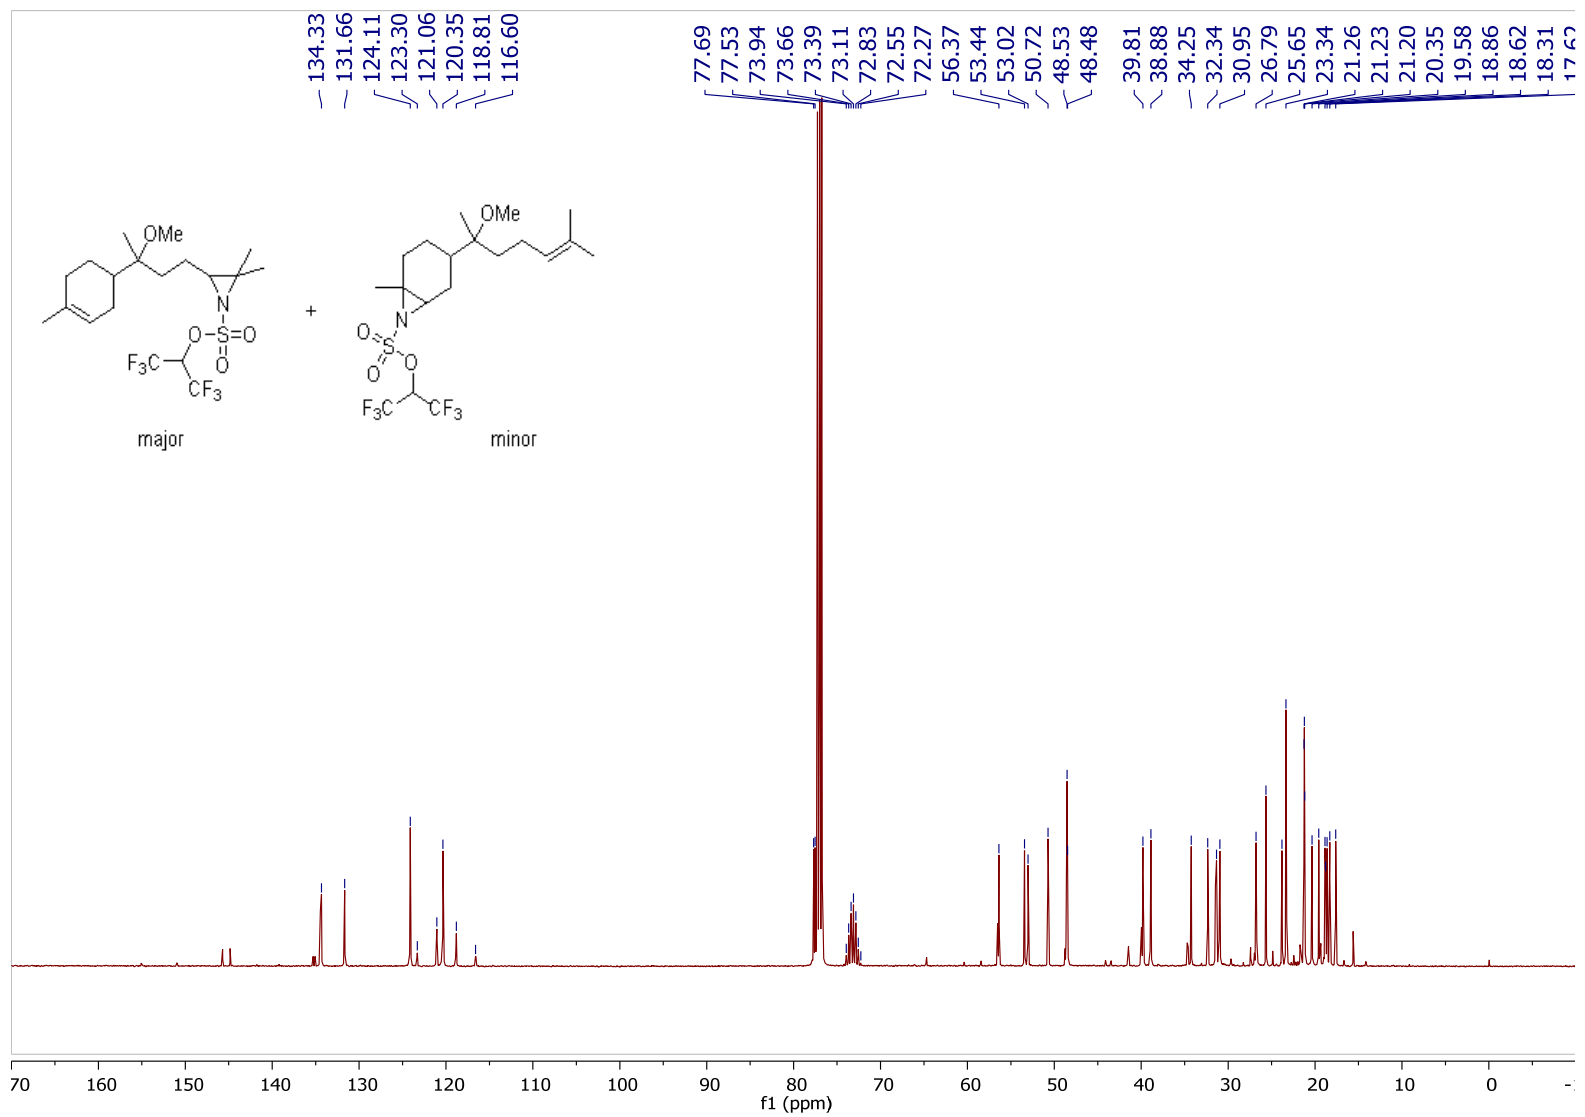

# Compounds 20b and 20d.

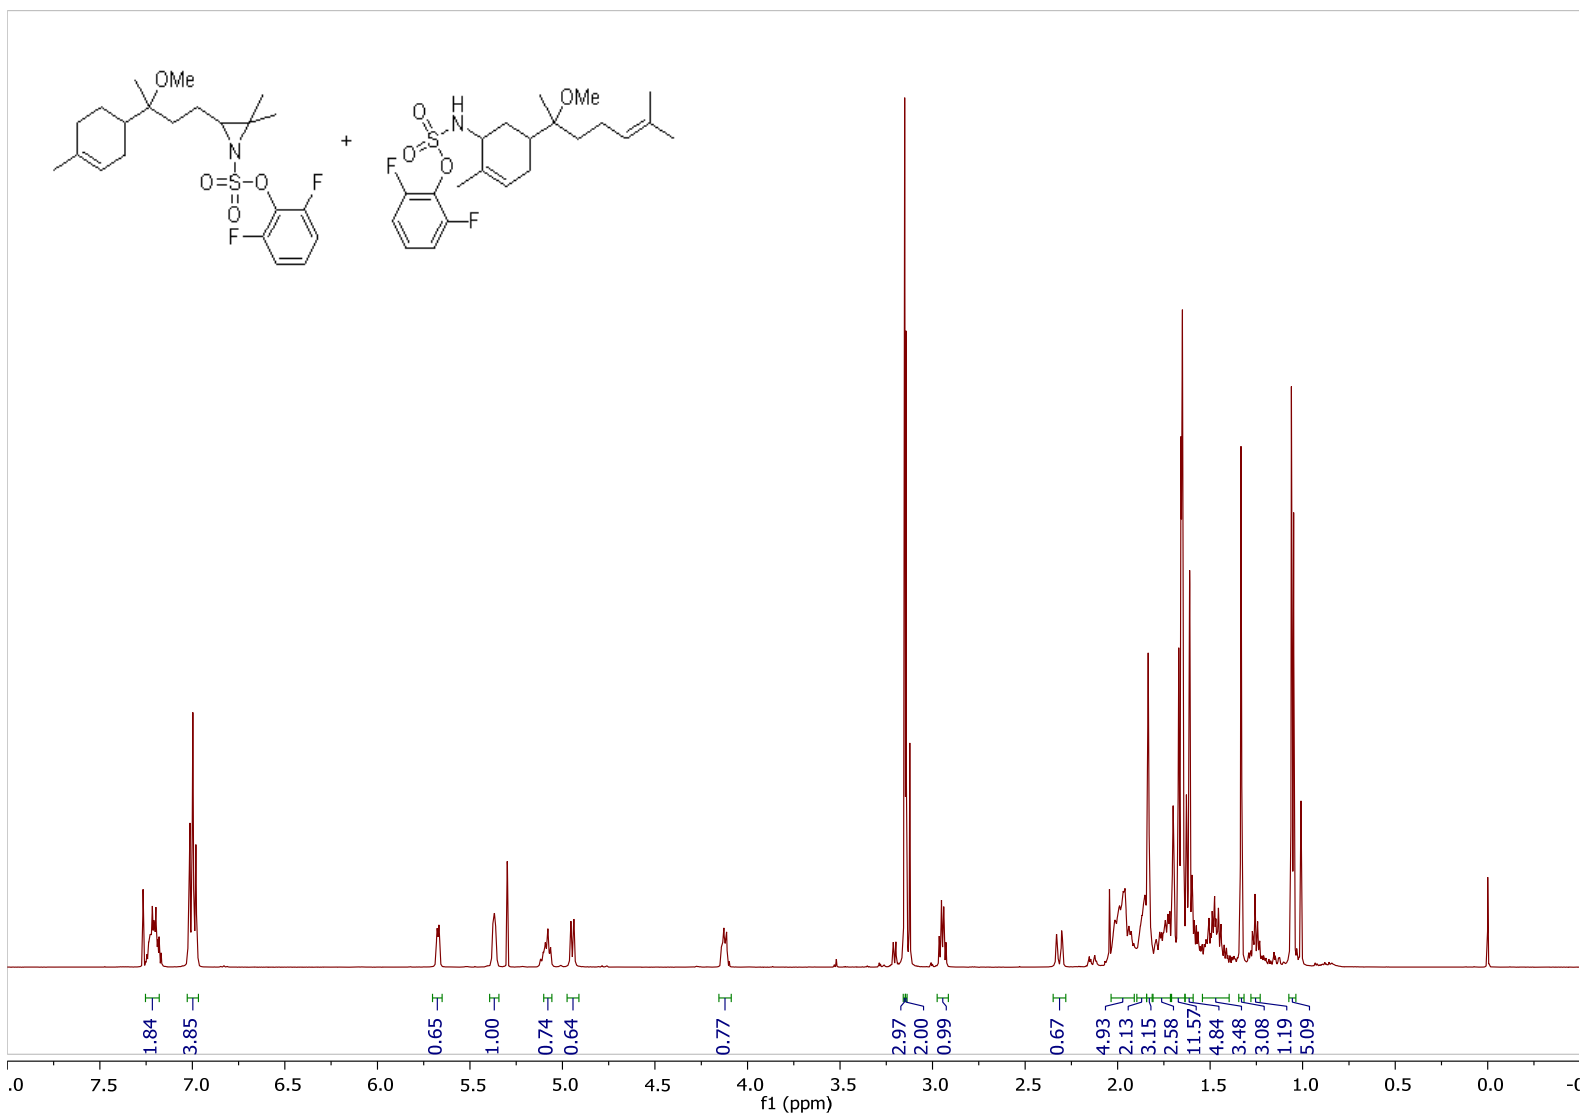

# Compounds 20b and 20d.

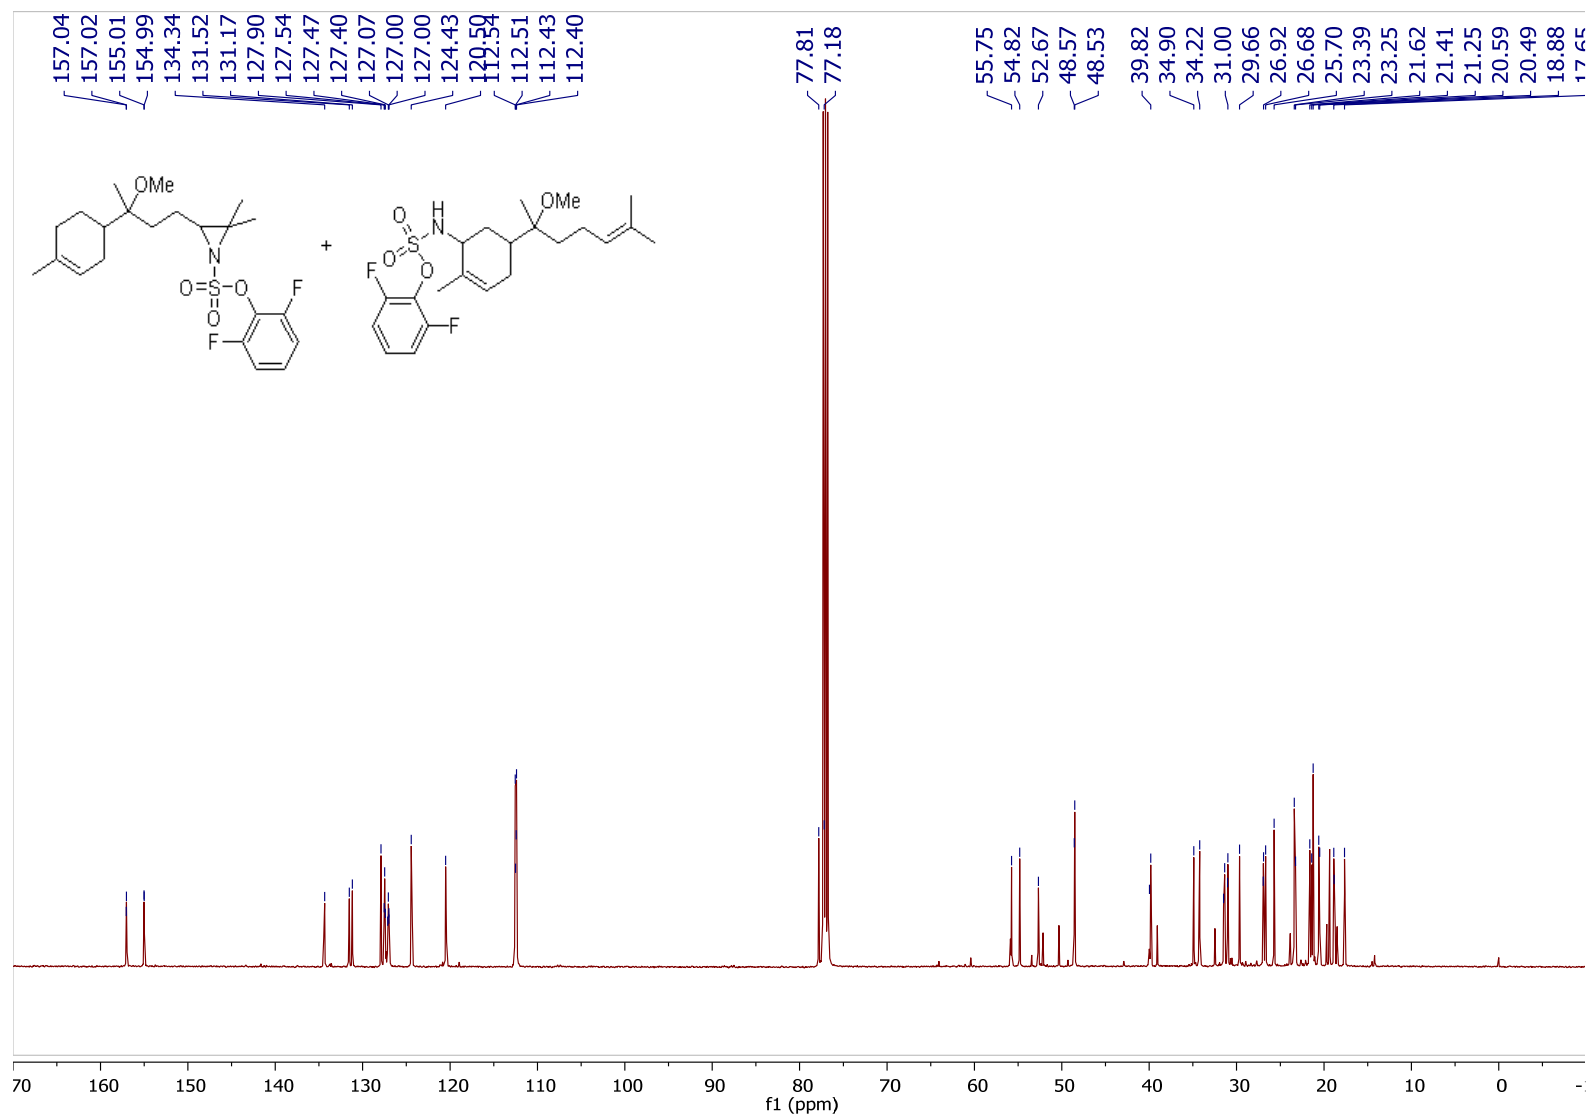

Compound 23a.

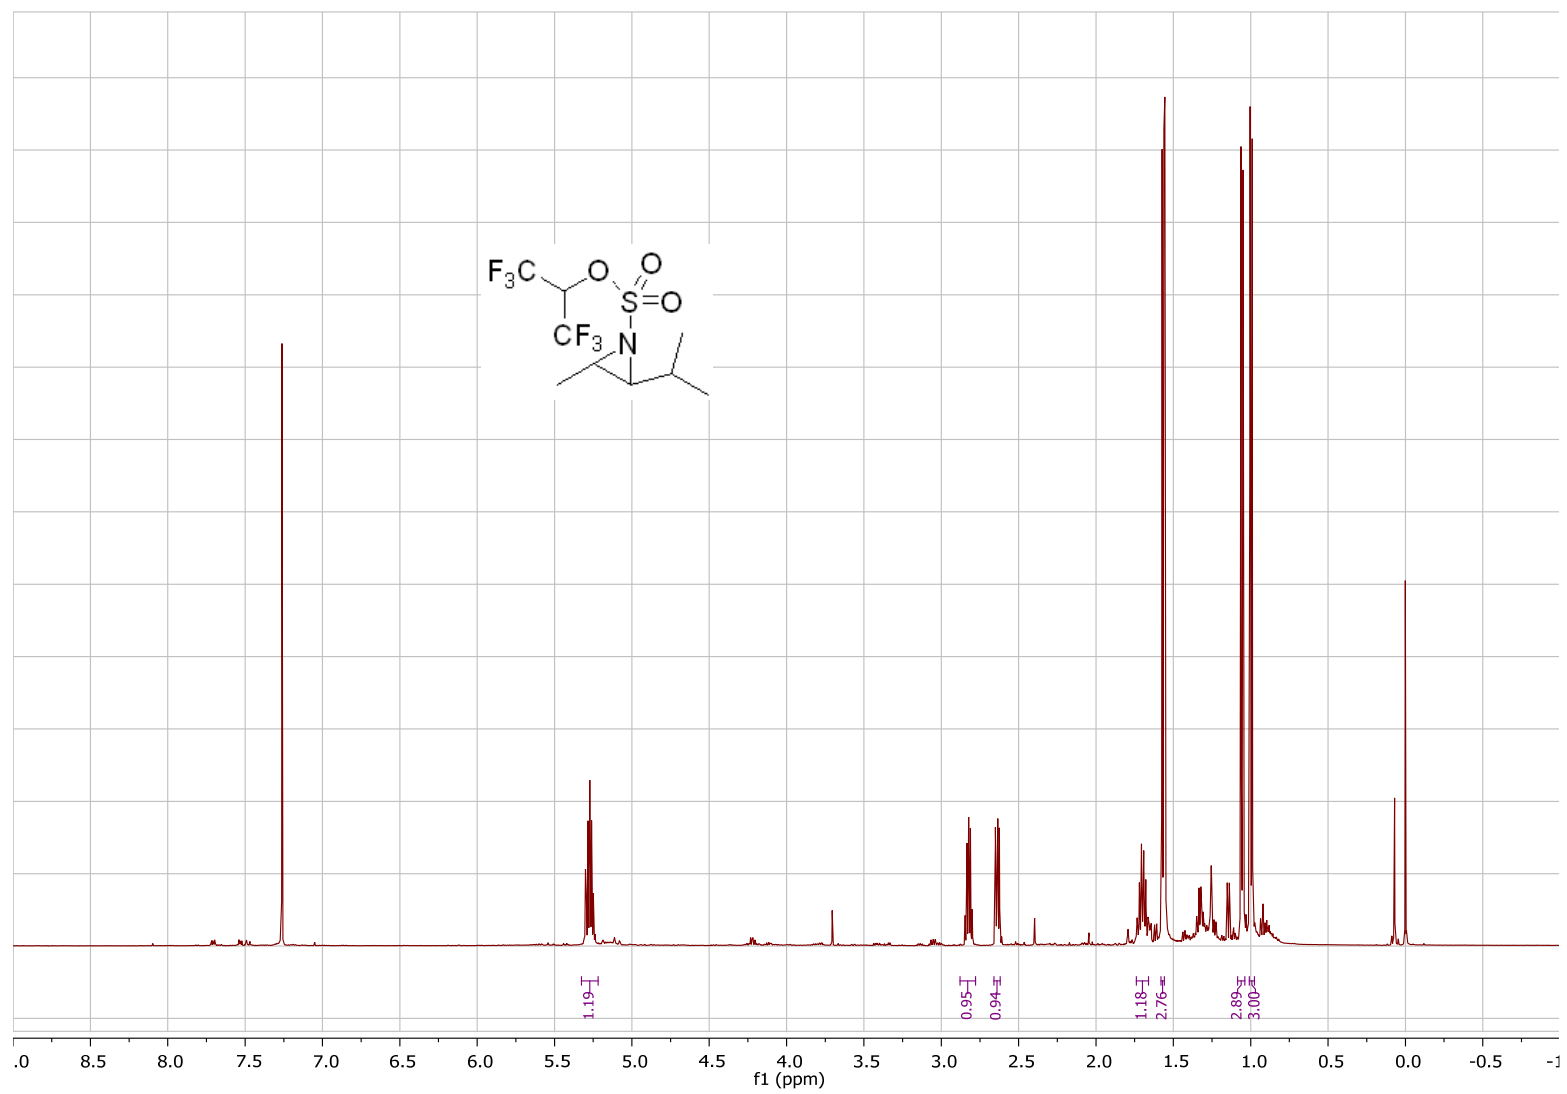

# Compound 23a.

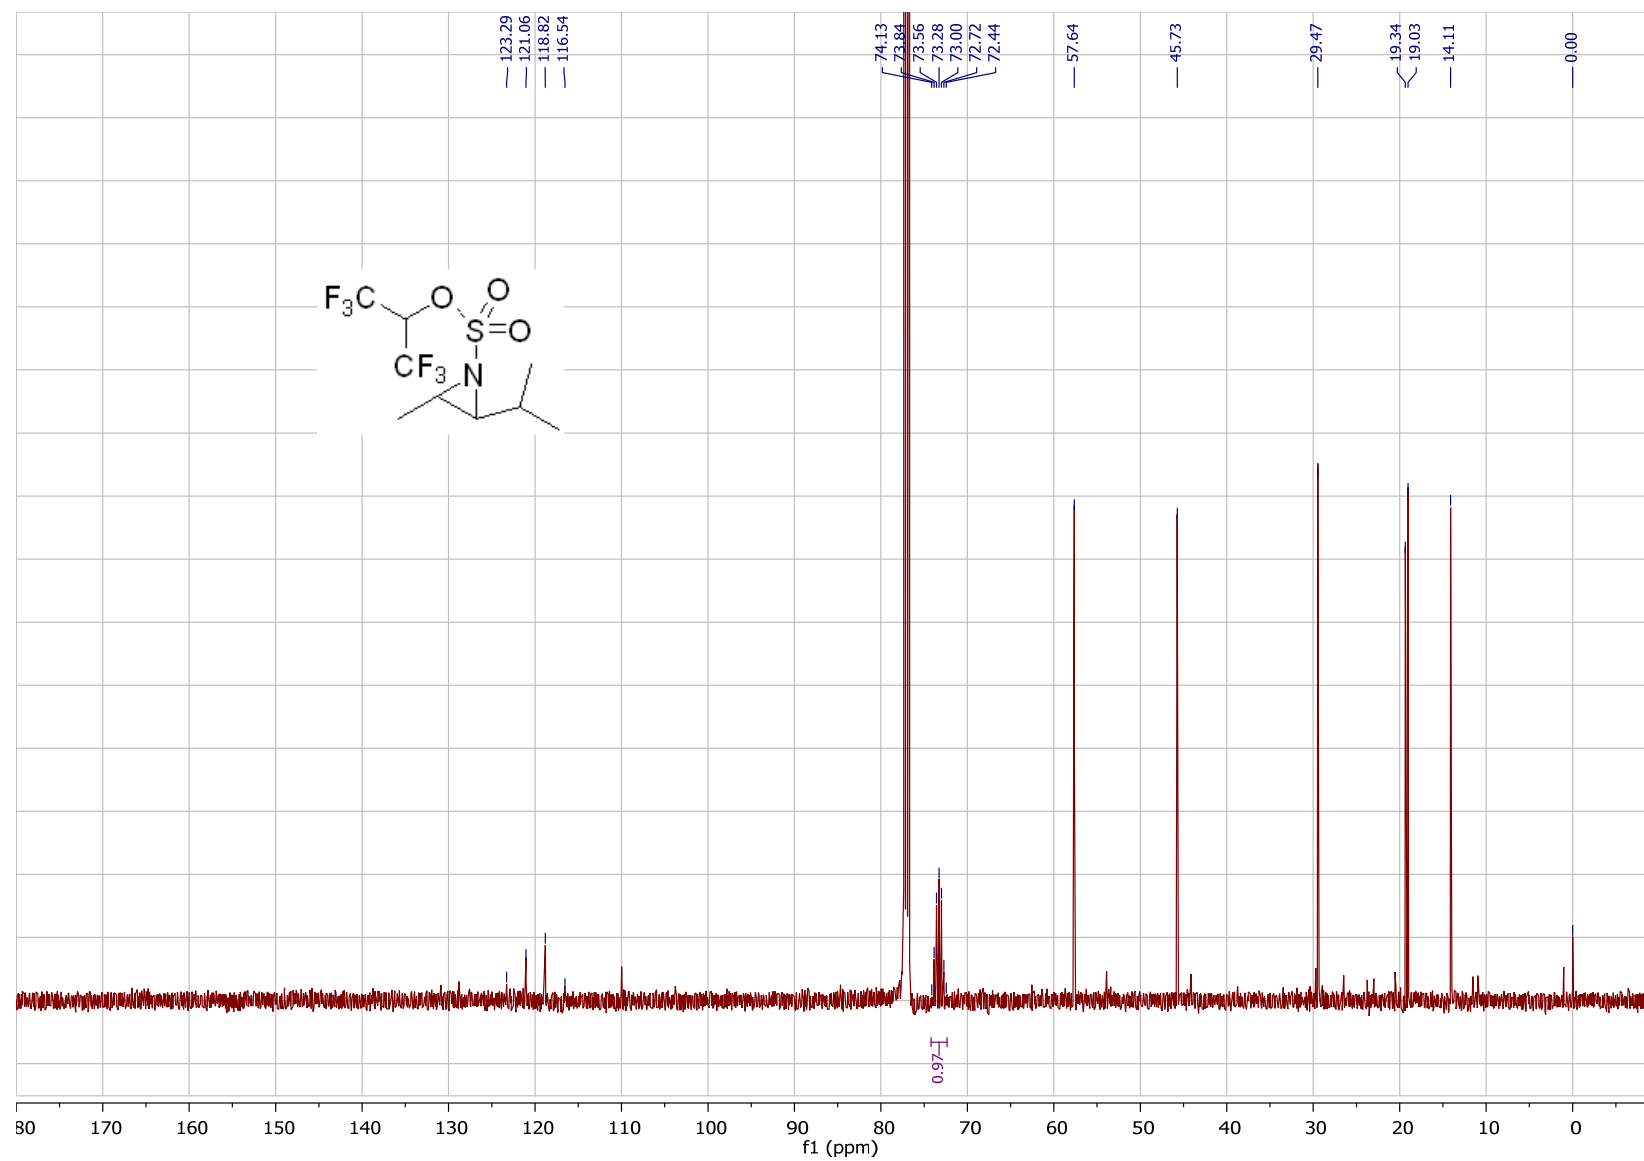



# Compound 23b and 23c.

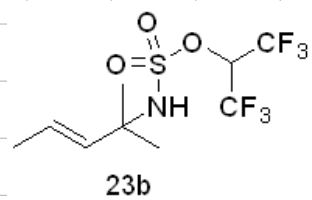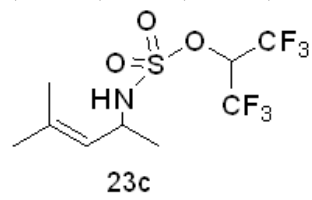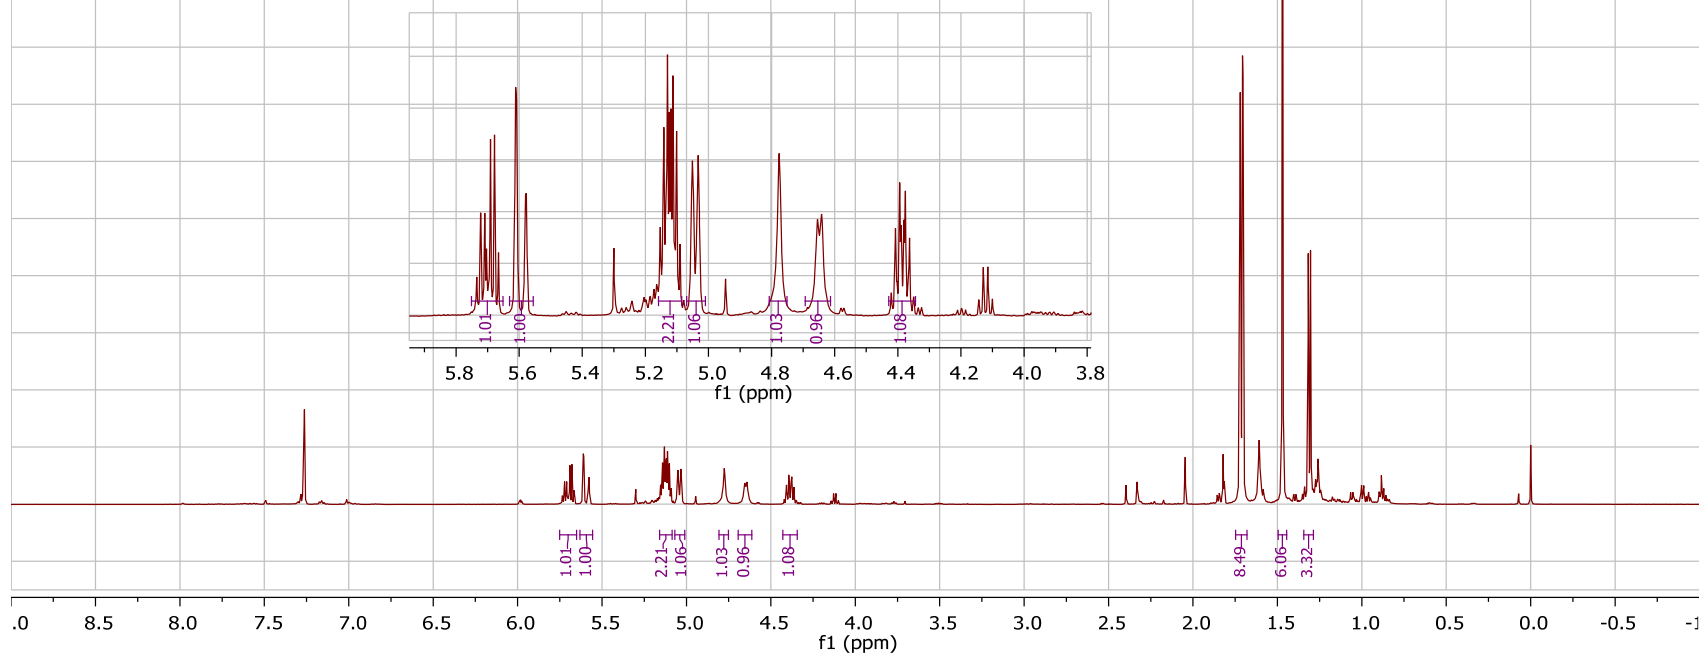

# Compound 23b and 23c.

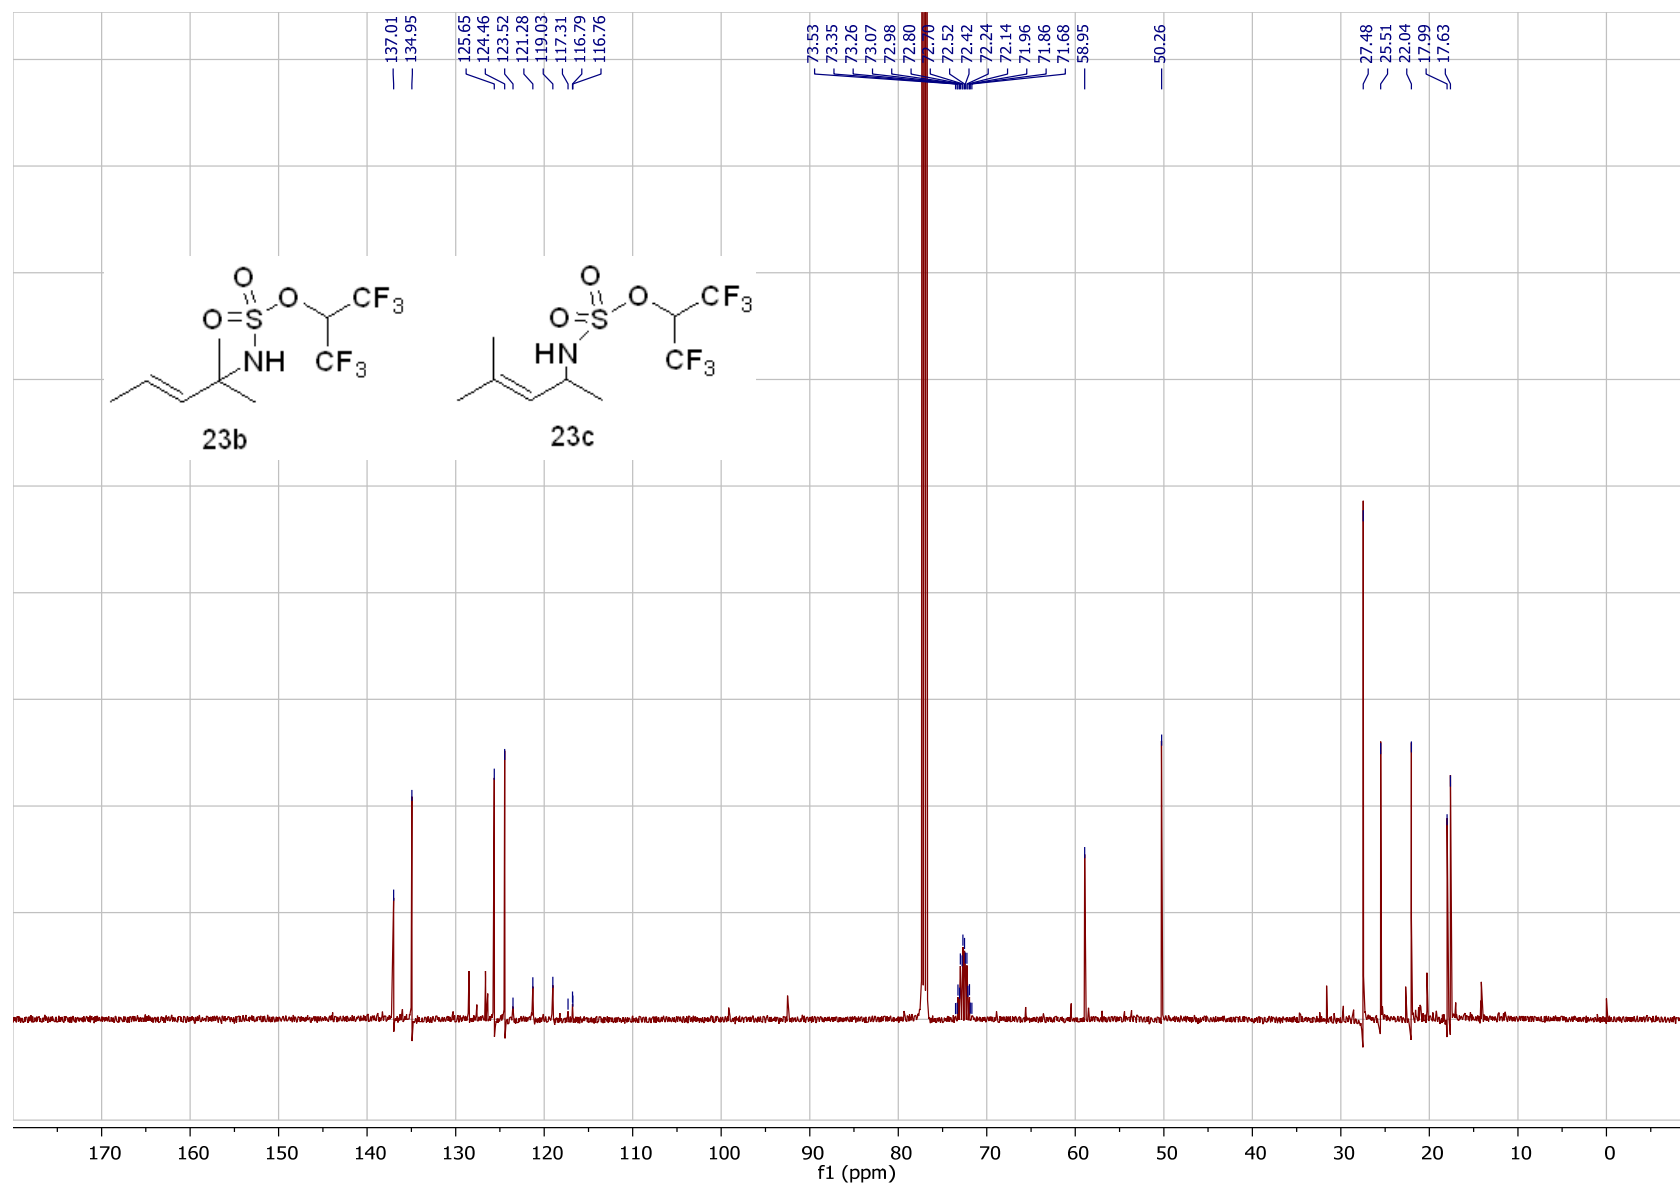

Compound 24a and 24b.

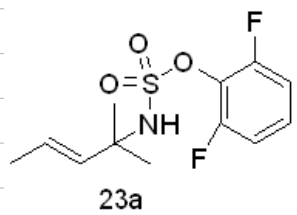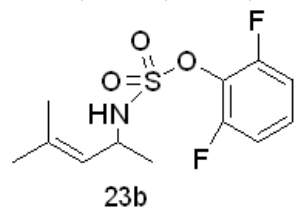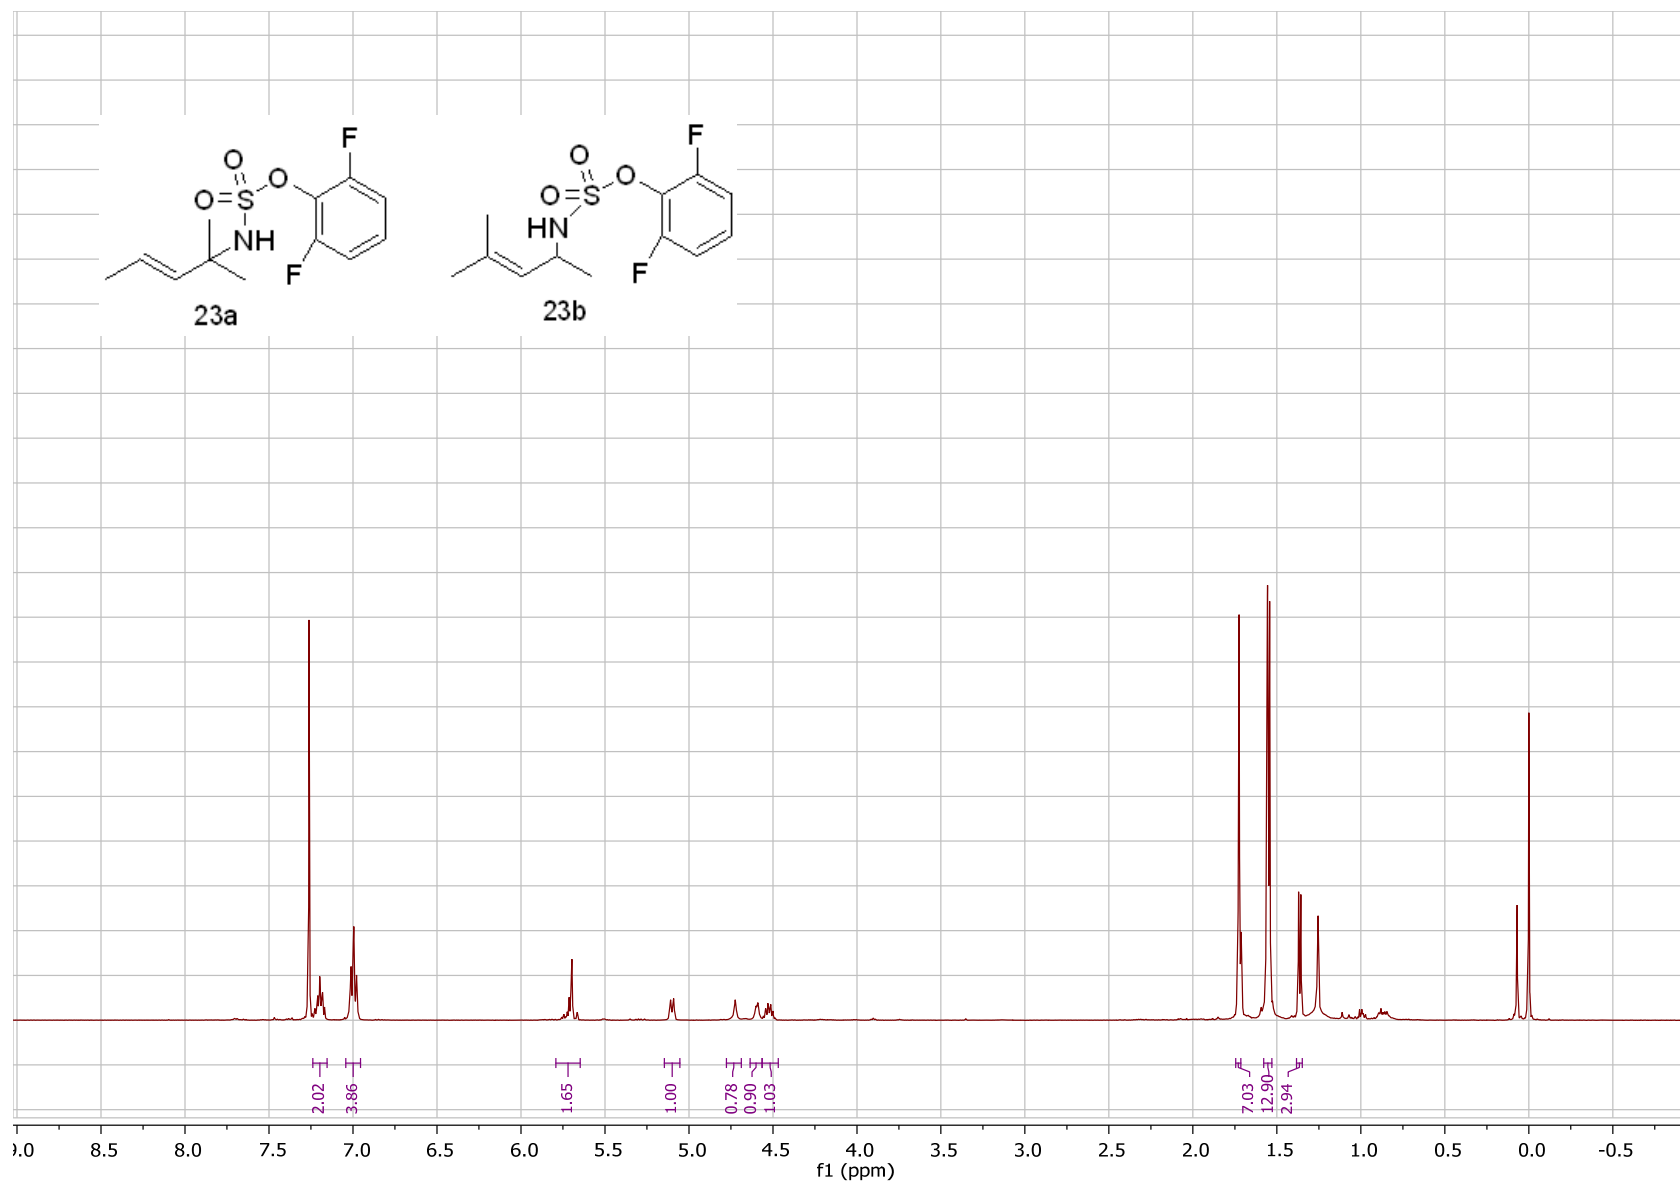

# Compound 24a and 24b.

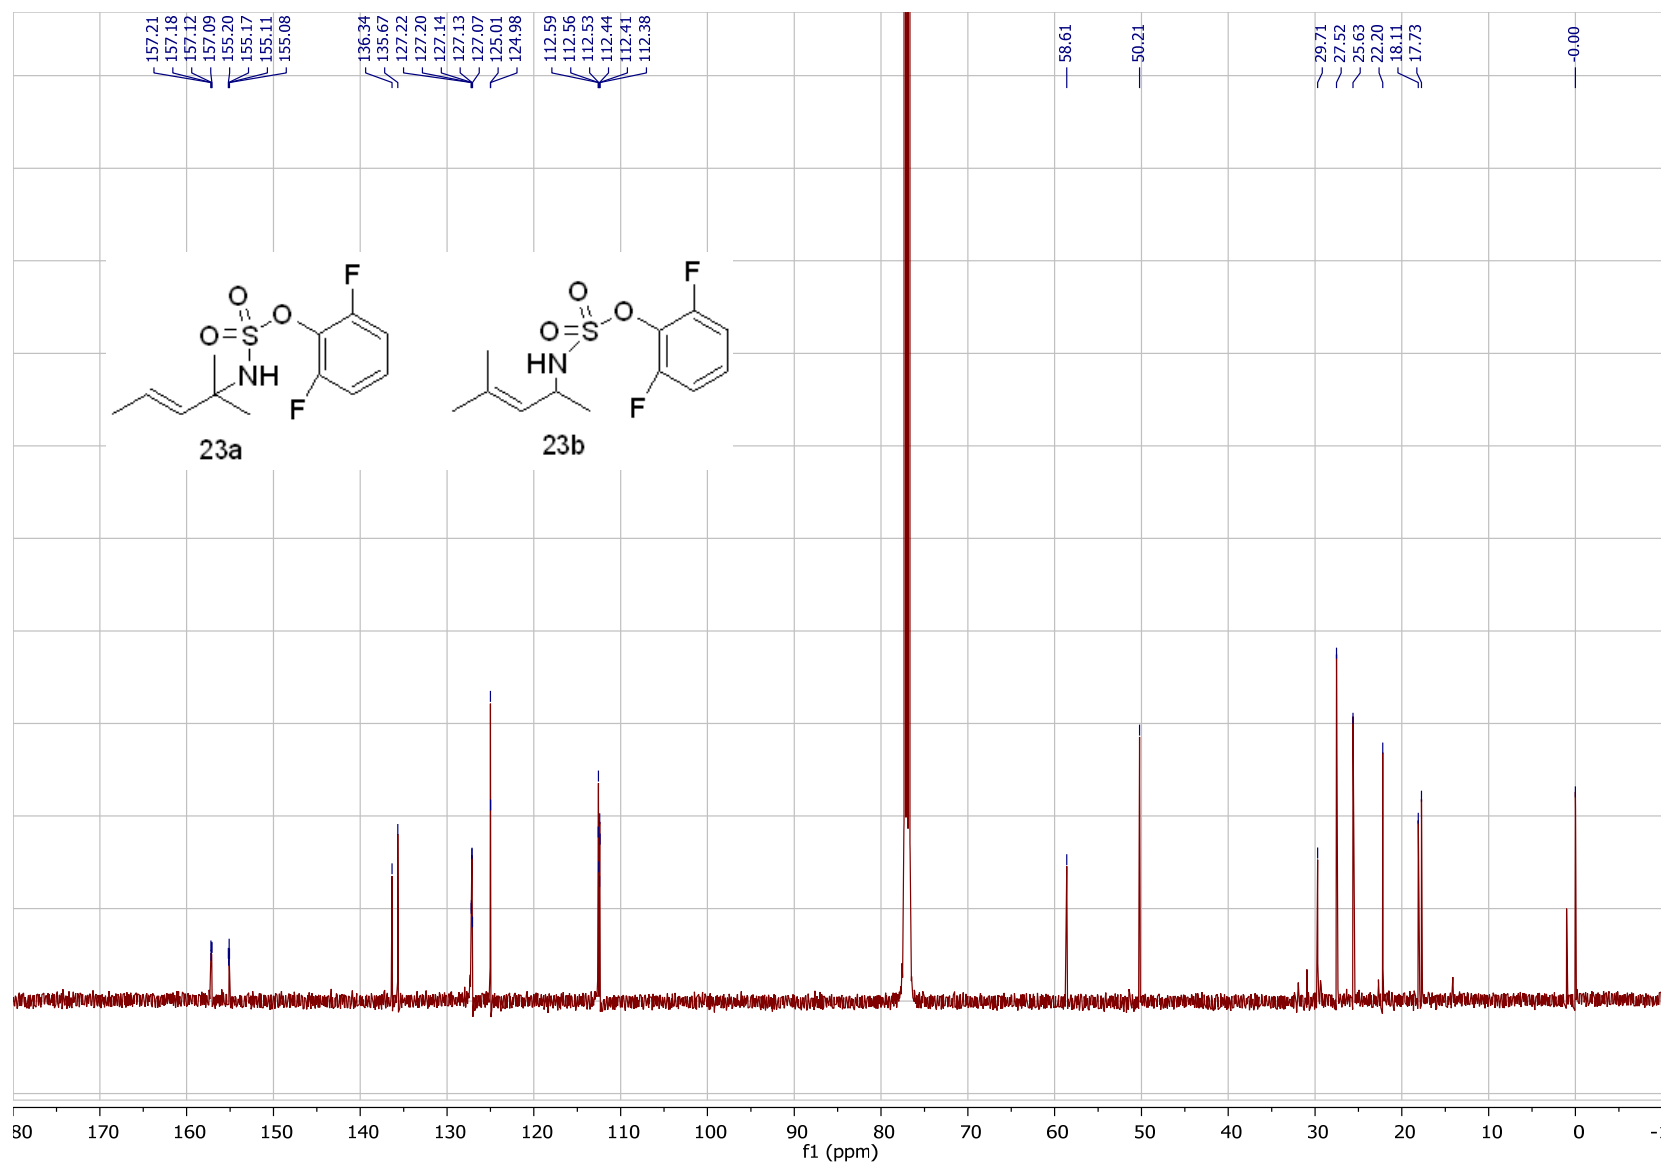

Supplement: NIHMS995962-supplement-supporting_02.pdf [file NIHMS995962-supplement-supporting_02.pdf]
